# Supplementary material
Source: PubMed Central journal article supplement (PMC3472453)

zc1-264

File: Proton

Pulse Sequence: s2pul

Solvent: cdcl3

Ambient temperature

Operator: falck

INOVA-500 "fire2.swmed.edu"

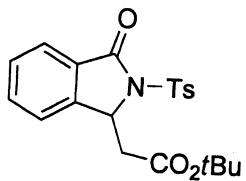

Relax. delay 1.000 sec  
Pulse 45.0 degrees  
Acq. time 2.049 sec  
Width 8000.0 Hz  
16 repetitions  
OBSERVE H1, 499.7778785 MHz  
DATA PROCESSING  
Line broadening 0.2 Hz  
FT size 65536  
Total time 0 min, 55 sec

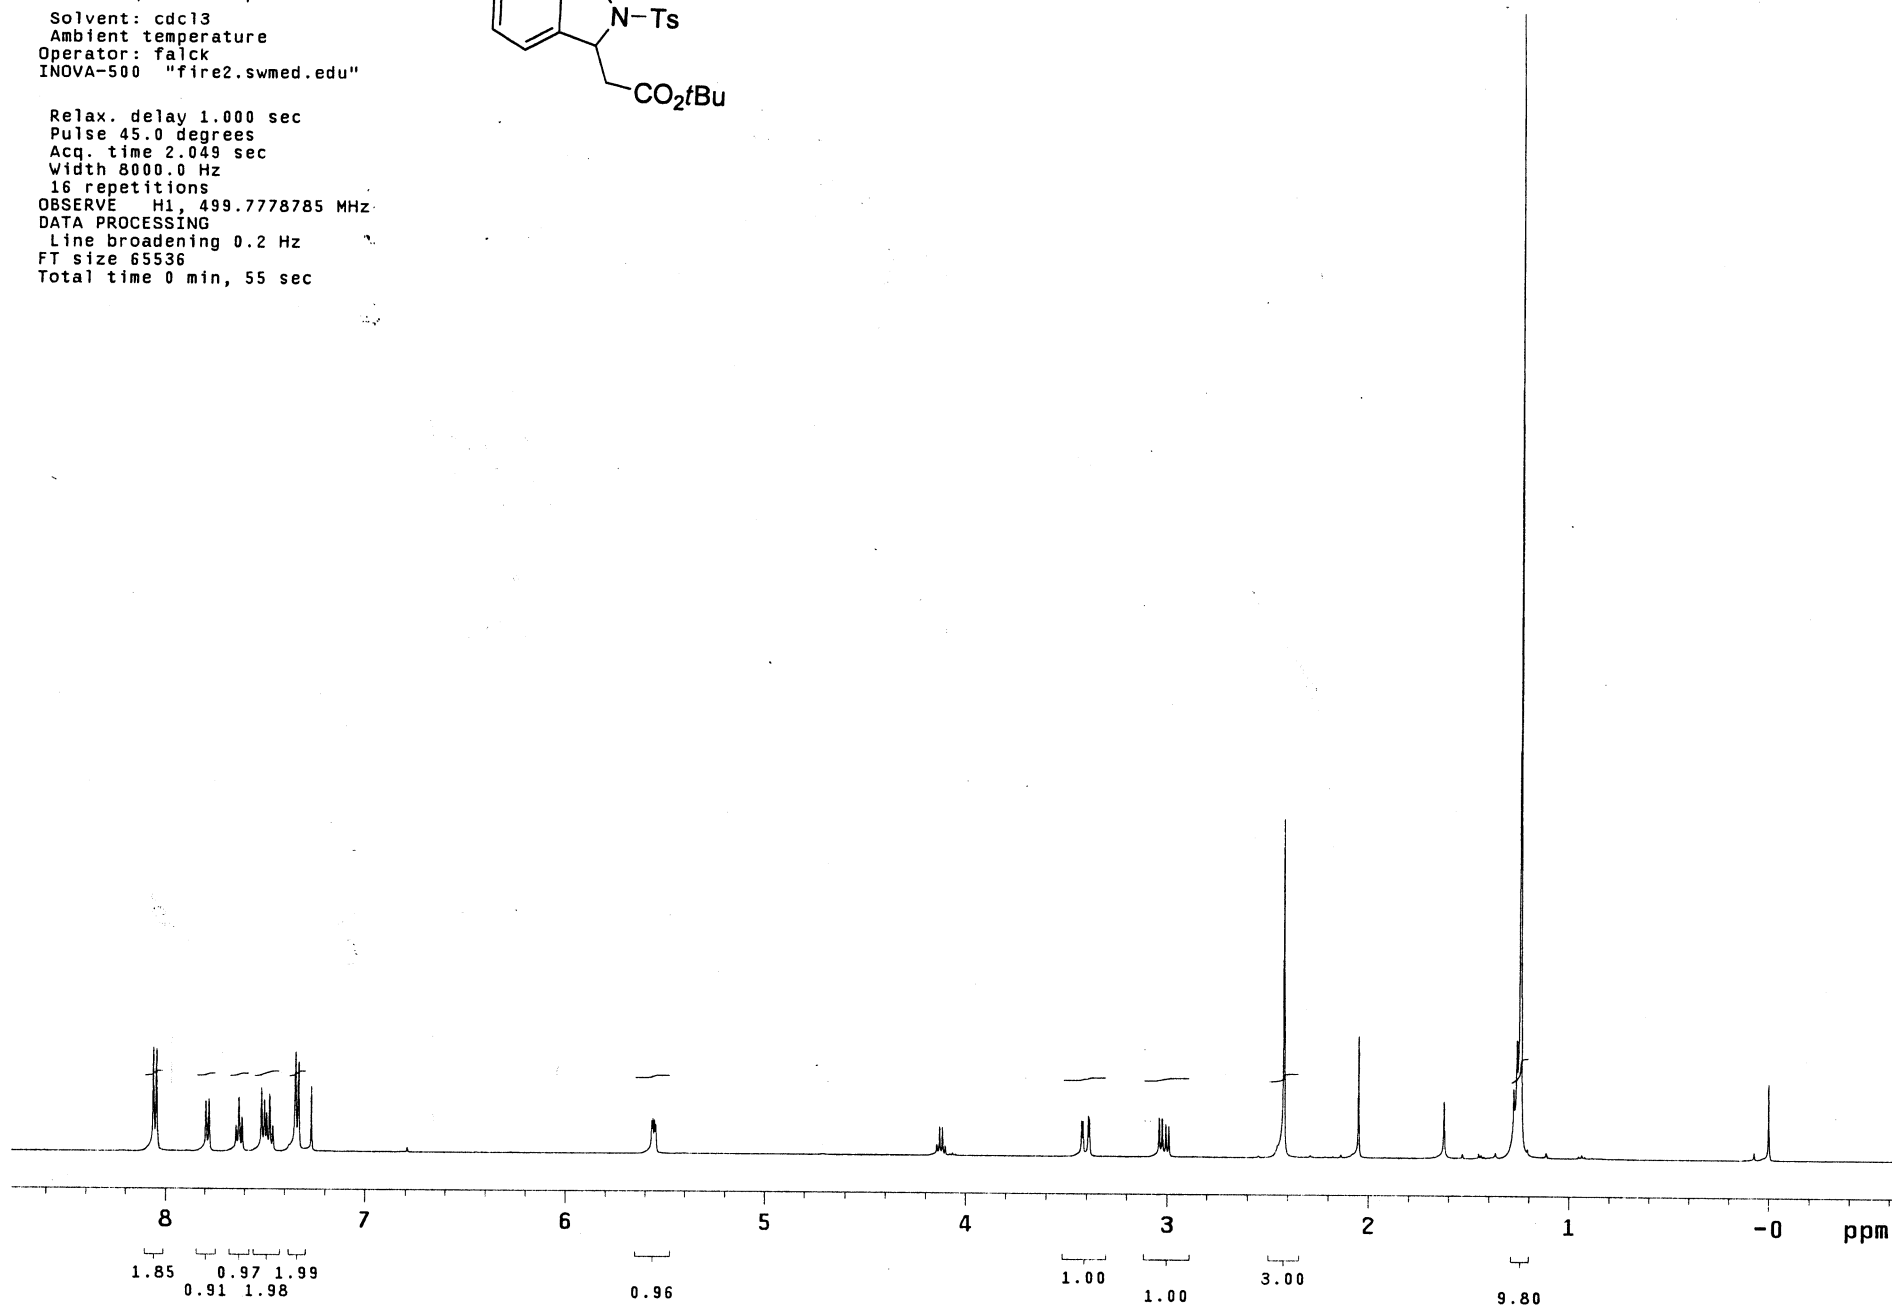

zcl-280carbon

File: Carbon

Pulse Sequence: s2pu1

Solvent: cdc13

Ambient temperature

Operator: falck

INOVA-500 "fire2.swmed.edu"

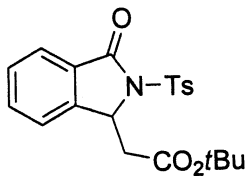

Relax. delay 1.000 sec  
Pulse 45.0 degrees  
Acq. time 1.300 sec  
Width 30165.9 Hz  
232 repetitions  
OBSERVE C13, 125.6692167 MHz  
DECOUPLE H1, 499.7803743 MHz  
Power 44 dB  
continuously on  
WALTZ-16 modulated  
DATA PROCESSING  
Line broadening 0.5 Hz  
FT size 131072  
Total time 38 min, 29 sec

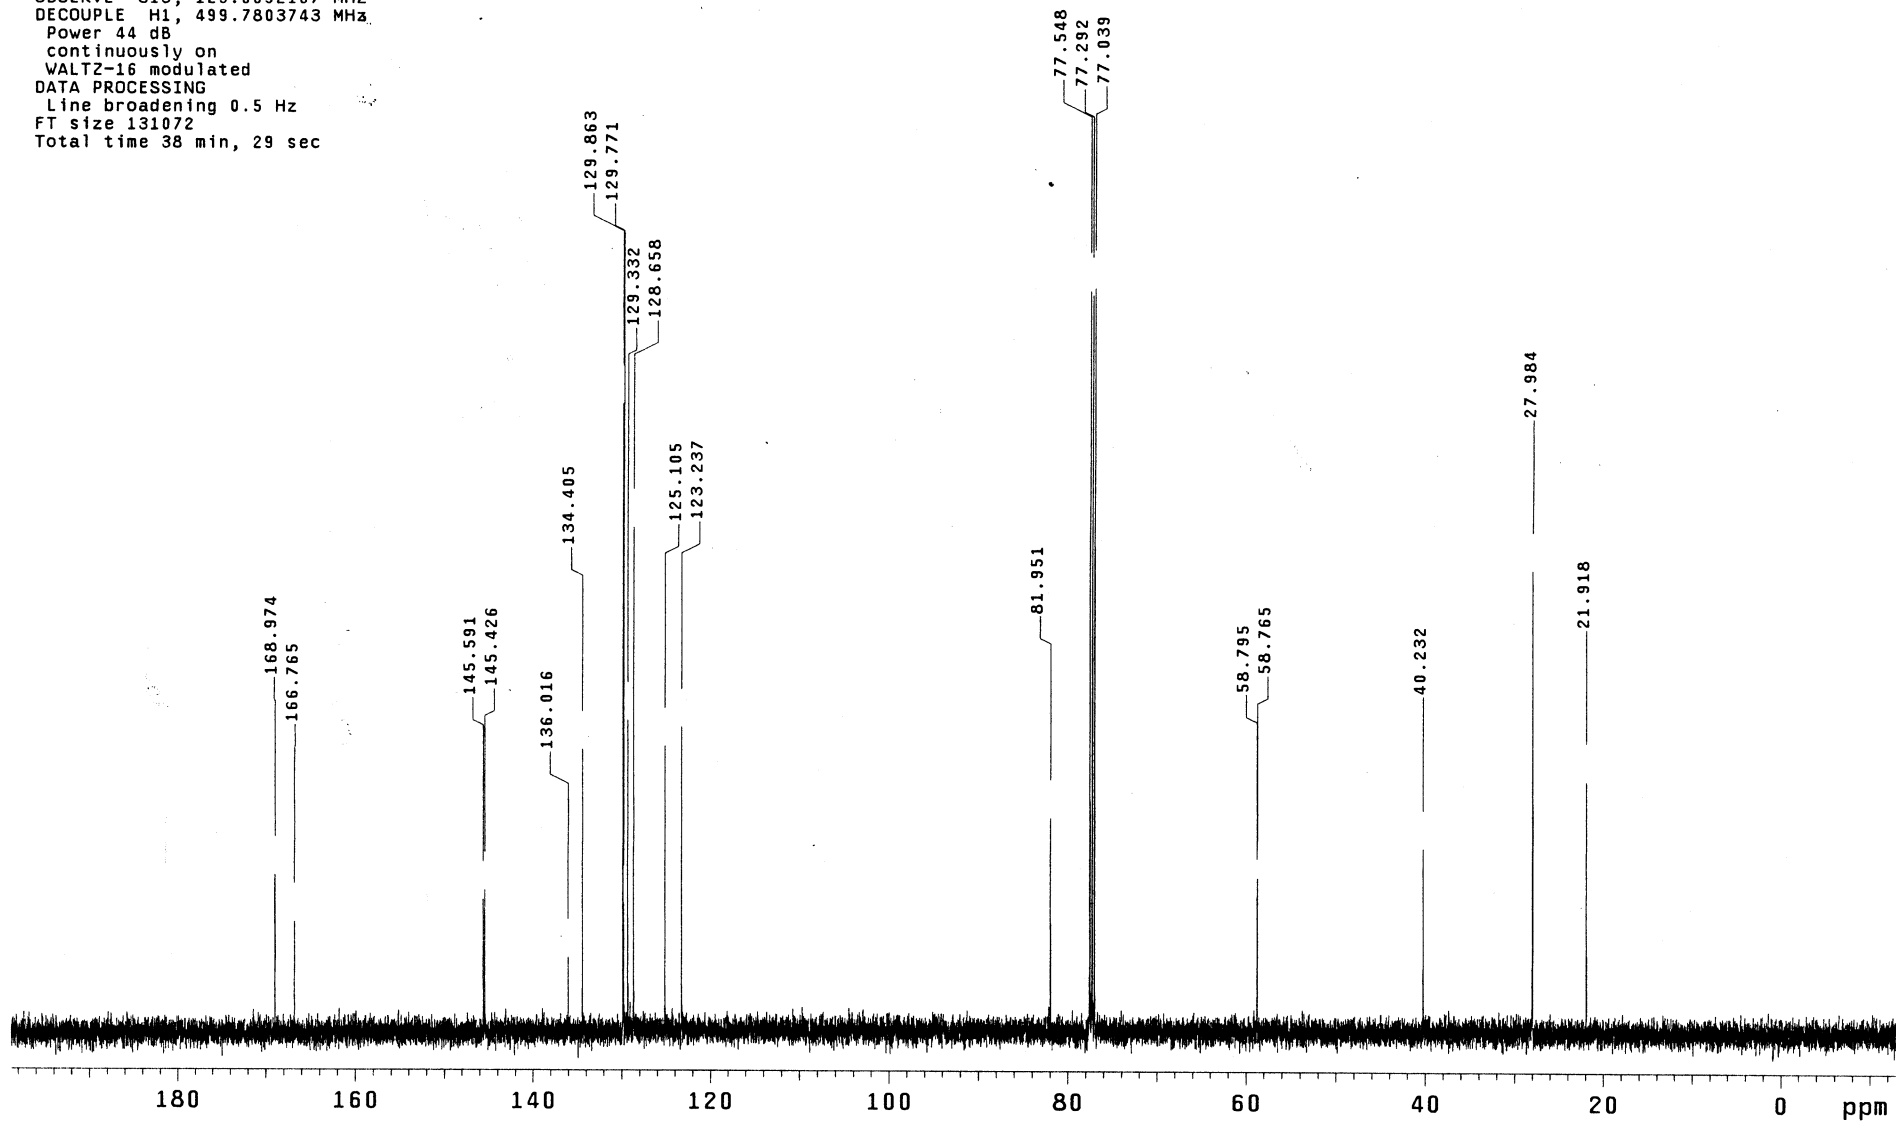

zc2-30

File: Proton  
Pulse Sequence: s2pu1  
Solvent: cdcl3  
Ambient temperature  
Operator: falck  
INOVA-500 "fire2.swmed.edu"

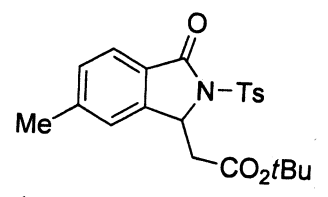

Relax. delay 1.000 sec  
Pulse 45.0 degrees  
Acq. time 2.049 sec  
Width 8000.0 Hz  
8 repetitions  
OBSERVE H1, 499.7778763 MHz  
DATA PROCESSING  
Line broadening 0.2 Hz  
FT size 65536  
Total time 0 min, 30 sec

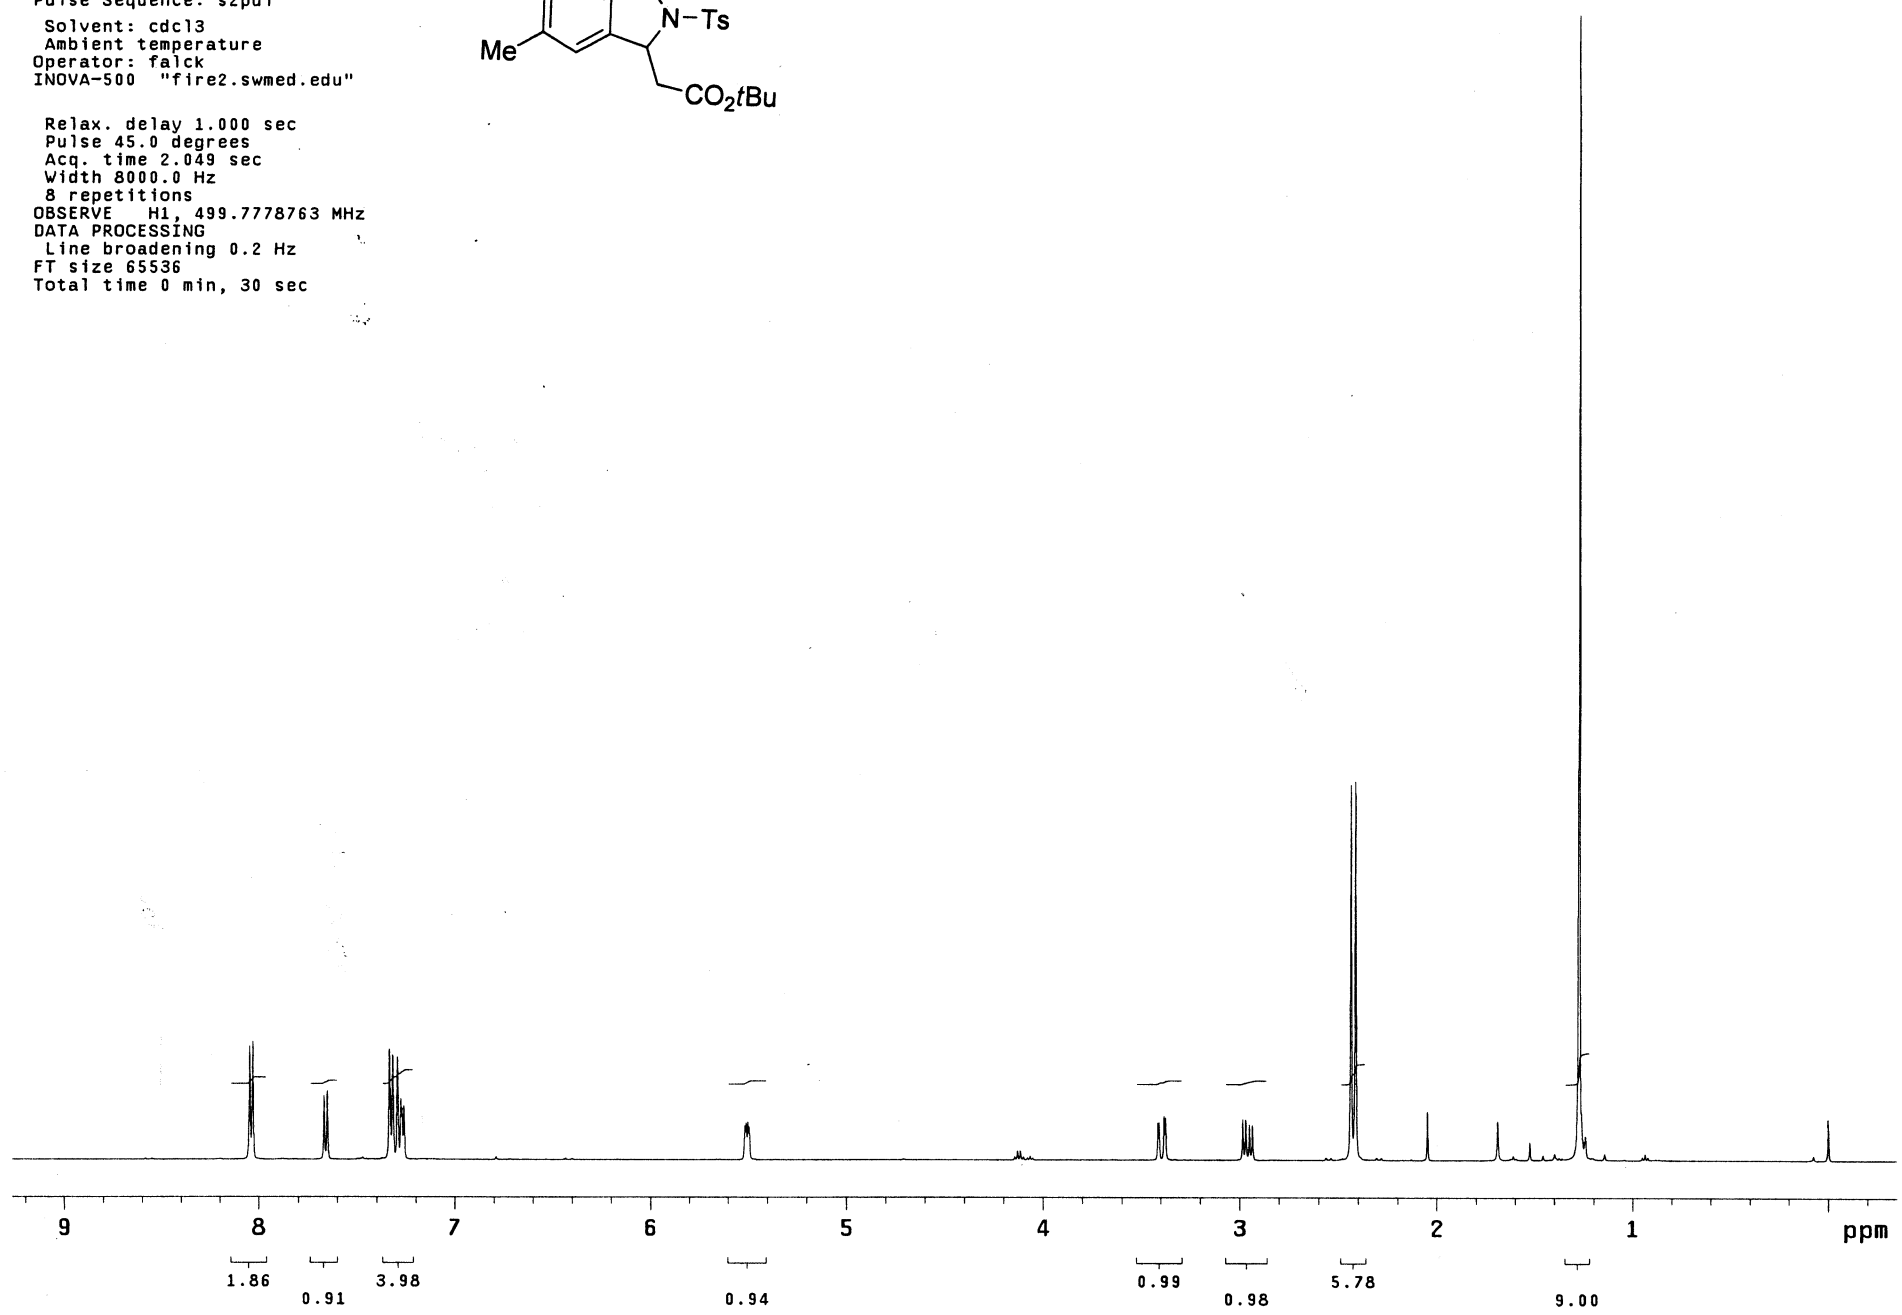

zc2-30

File: Carbon

Pulse Sequence: s2pu1

Solvent: cdcl3

Ambient temperature

Operator: falck

INOVA-500 "fire2.swmed.edu"

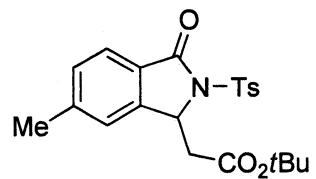

Relax. delay 1.000 sec  
Pulse 45.0 degrees  
Acq. time 1.300 sec  
Width 30165.9 Hz  
288 repetitions  
OBSERVE C13, 125.6692167 MHz  
DECOUPLE H1, 499.7803743 MHz  
Power 36 dB  
continuously on  
WALTZ-16 modulated  
DATA PROCESSING  
Line broadening 0.5 Hz  
FT size 131072  
Total time 38 min, 29 sec

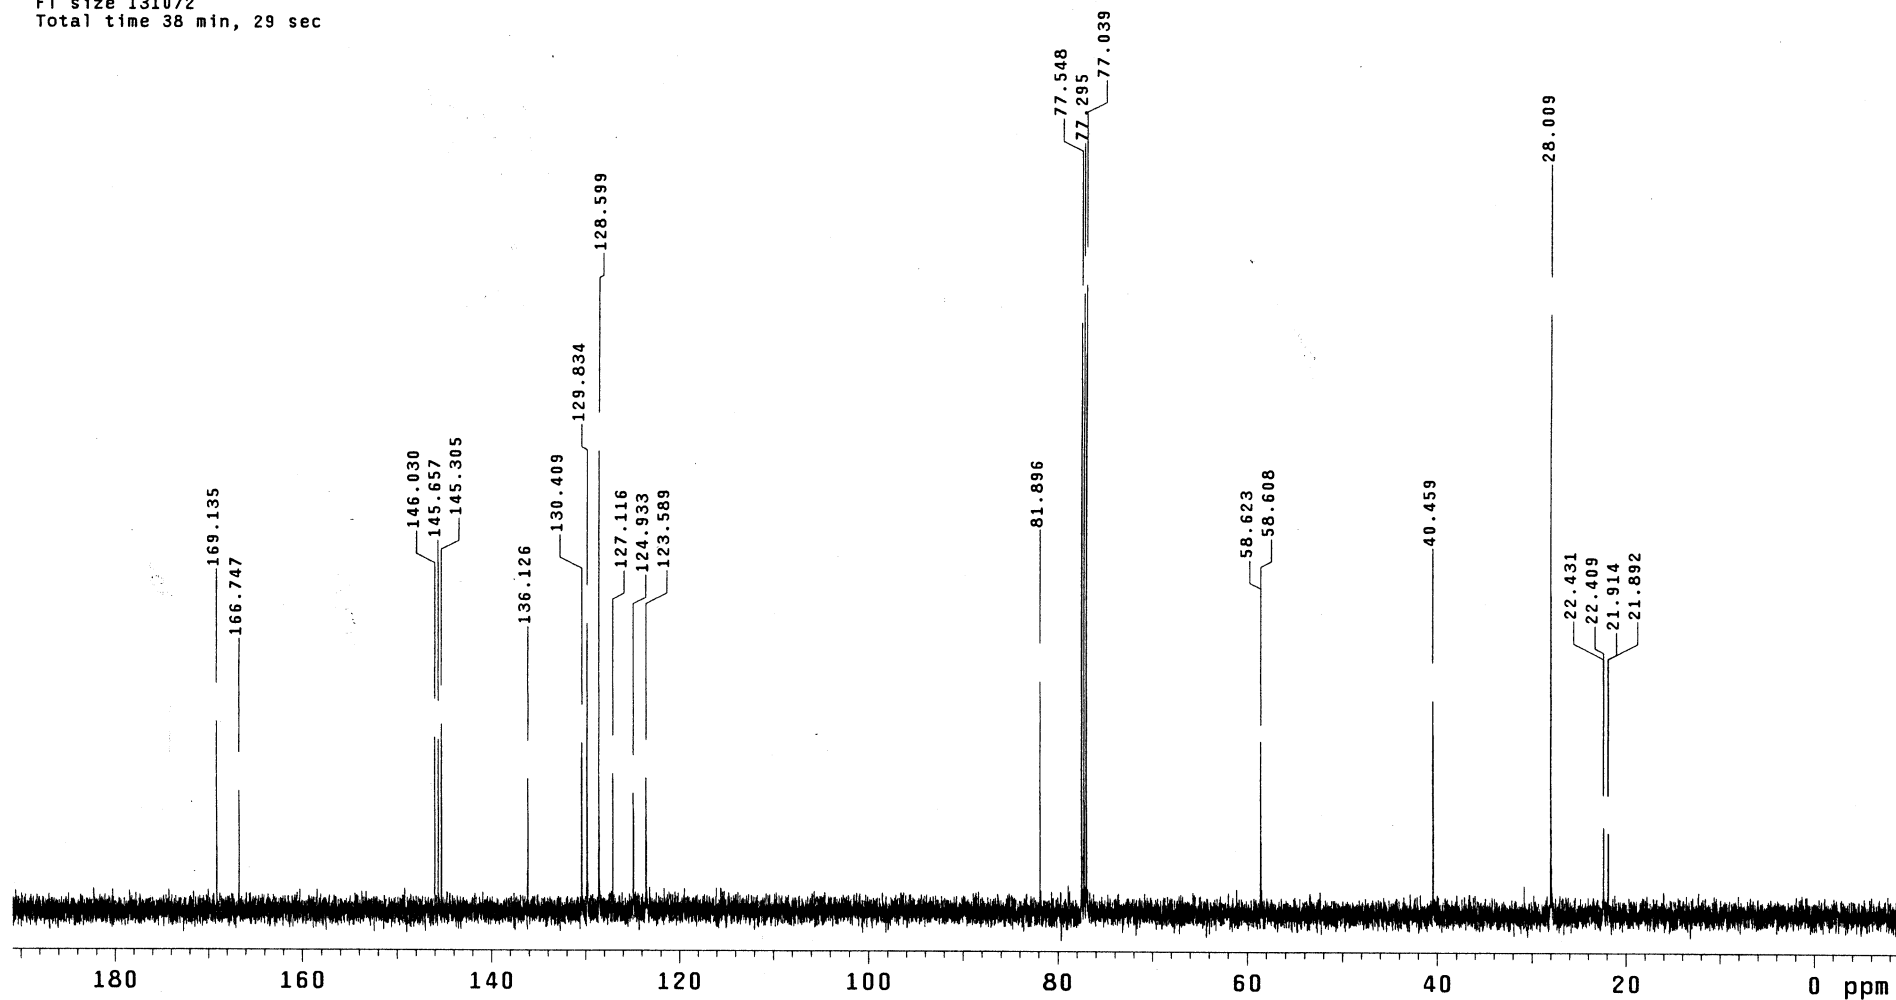

zc2-33

File: Proton

Pulse Sequence: s2pu1

Solvent: cdcl3  
Ambient temperature  
Operator: falck  
INOVA-500 "fire2.swmed.edu"

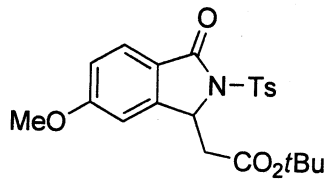

Relax. delay 1.000 sec  
Pulse 45.0 degrees  
Acq. time 2.048 sec  
Width 8000.0 Hz  
8 repetitions  
OBSERVE H1, 499.7778768 MHz  
DATA PROCESSING  
Line broadening 0.2 Hz  
FT size 65536  
Total time 0 min, 30 sec

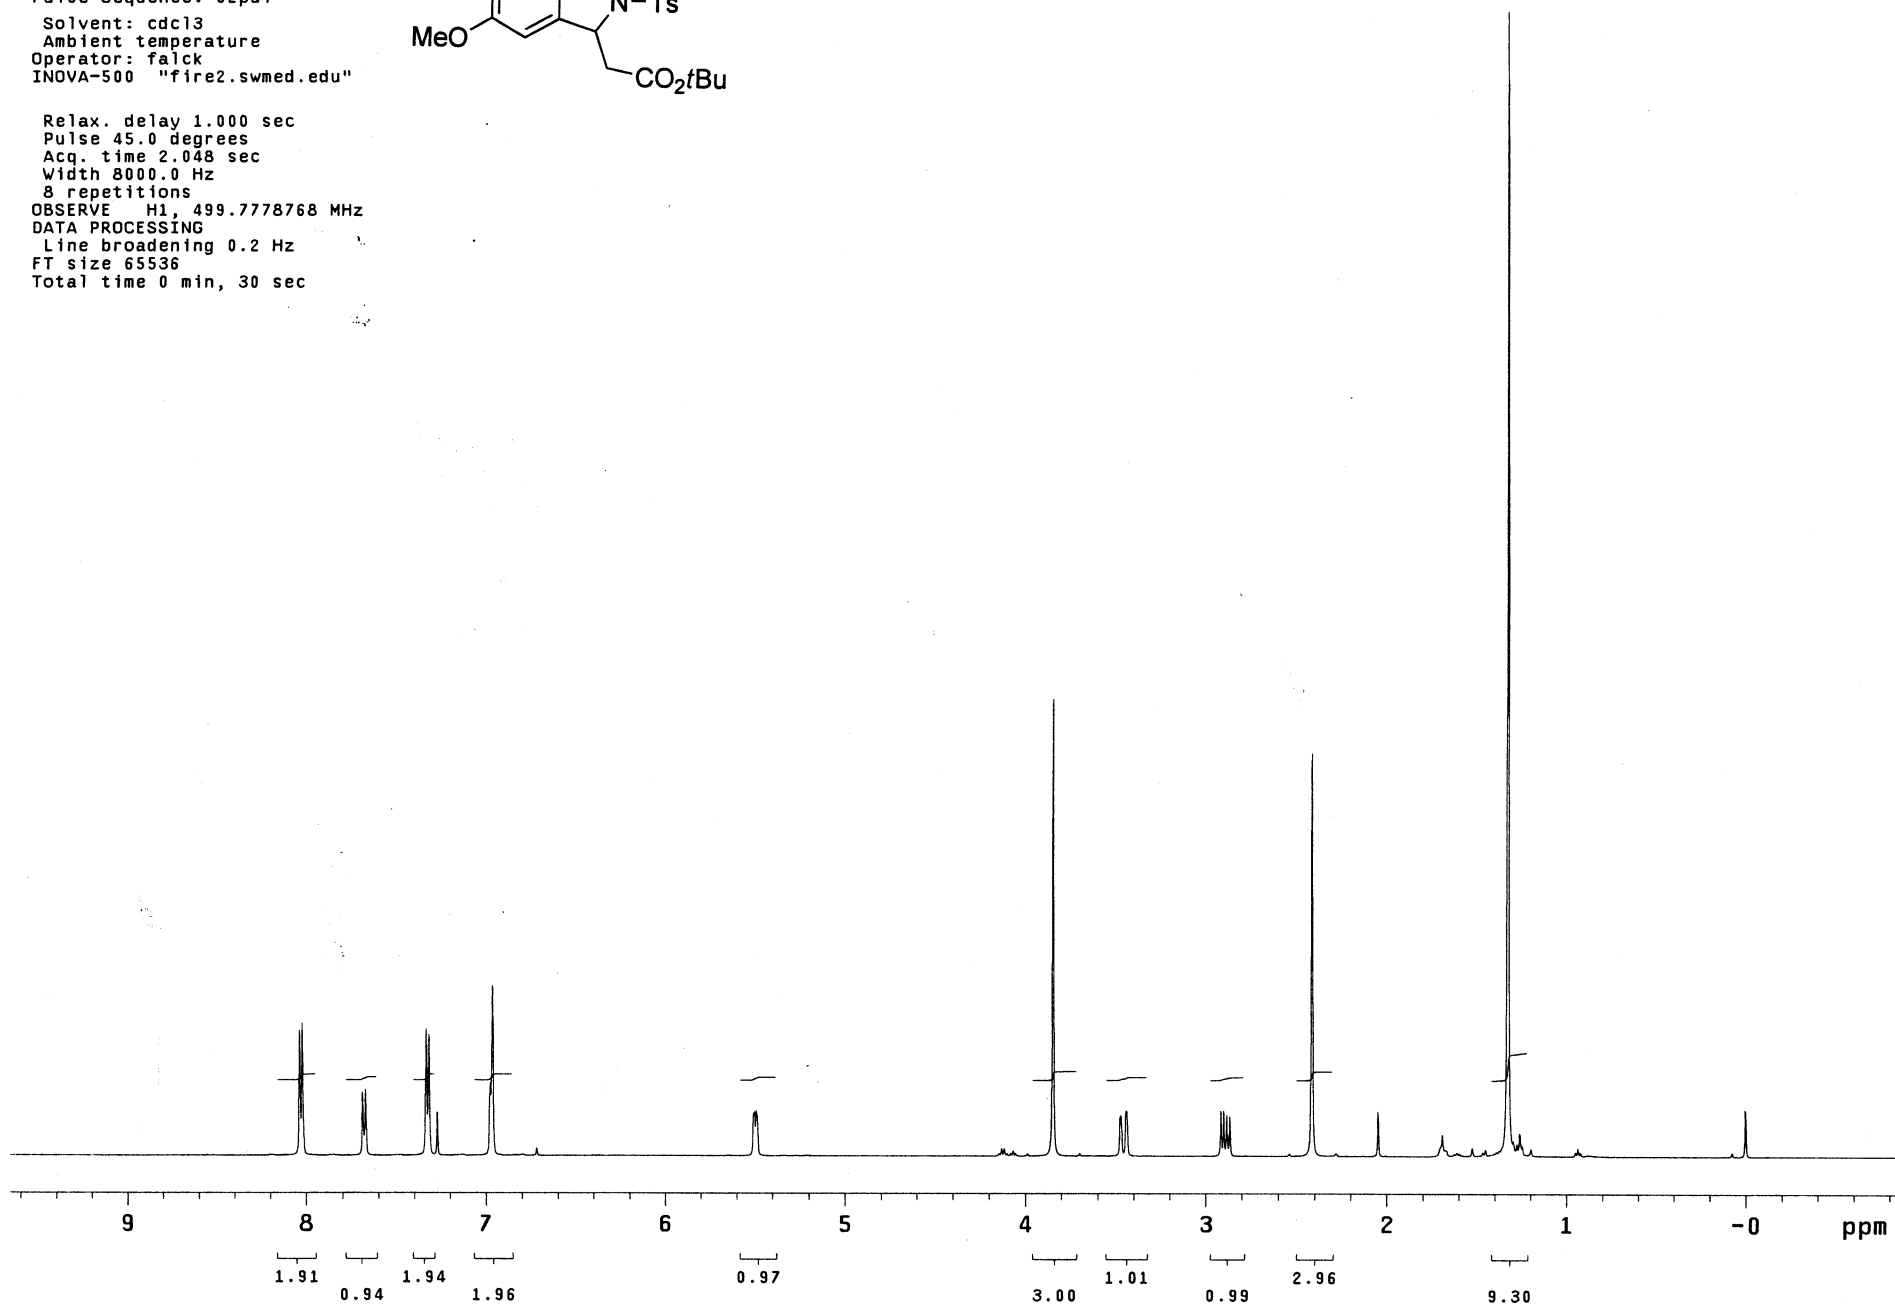

zc2-33

File: Carbon

Pulse Sequence: s2pu1

Solvent: cdc13

Ambient temperature

Operator: falck

INOVA-500 "fire2.swmed.edu"

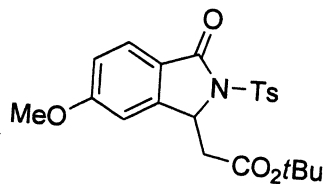

Relax. delay 1.000 sec  
Pulse 45.0 degrees  
Acq. time 1.300 sec  
Width 30165.9 Hz  
408 repetitions  
OBSERVE C13, 125.6692167 MHz  
DECOUPLE H1, 499.7803743 MHz  
Power 36 dB  
continuously on  
WALTZ-16 modulated  
DATA PROCESSING  
Line broadening 0.5 Hz  
FT size 131072  
Total time 38 min, 29 sec

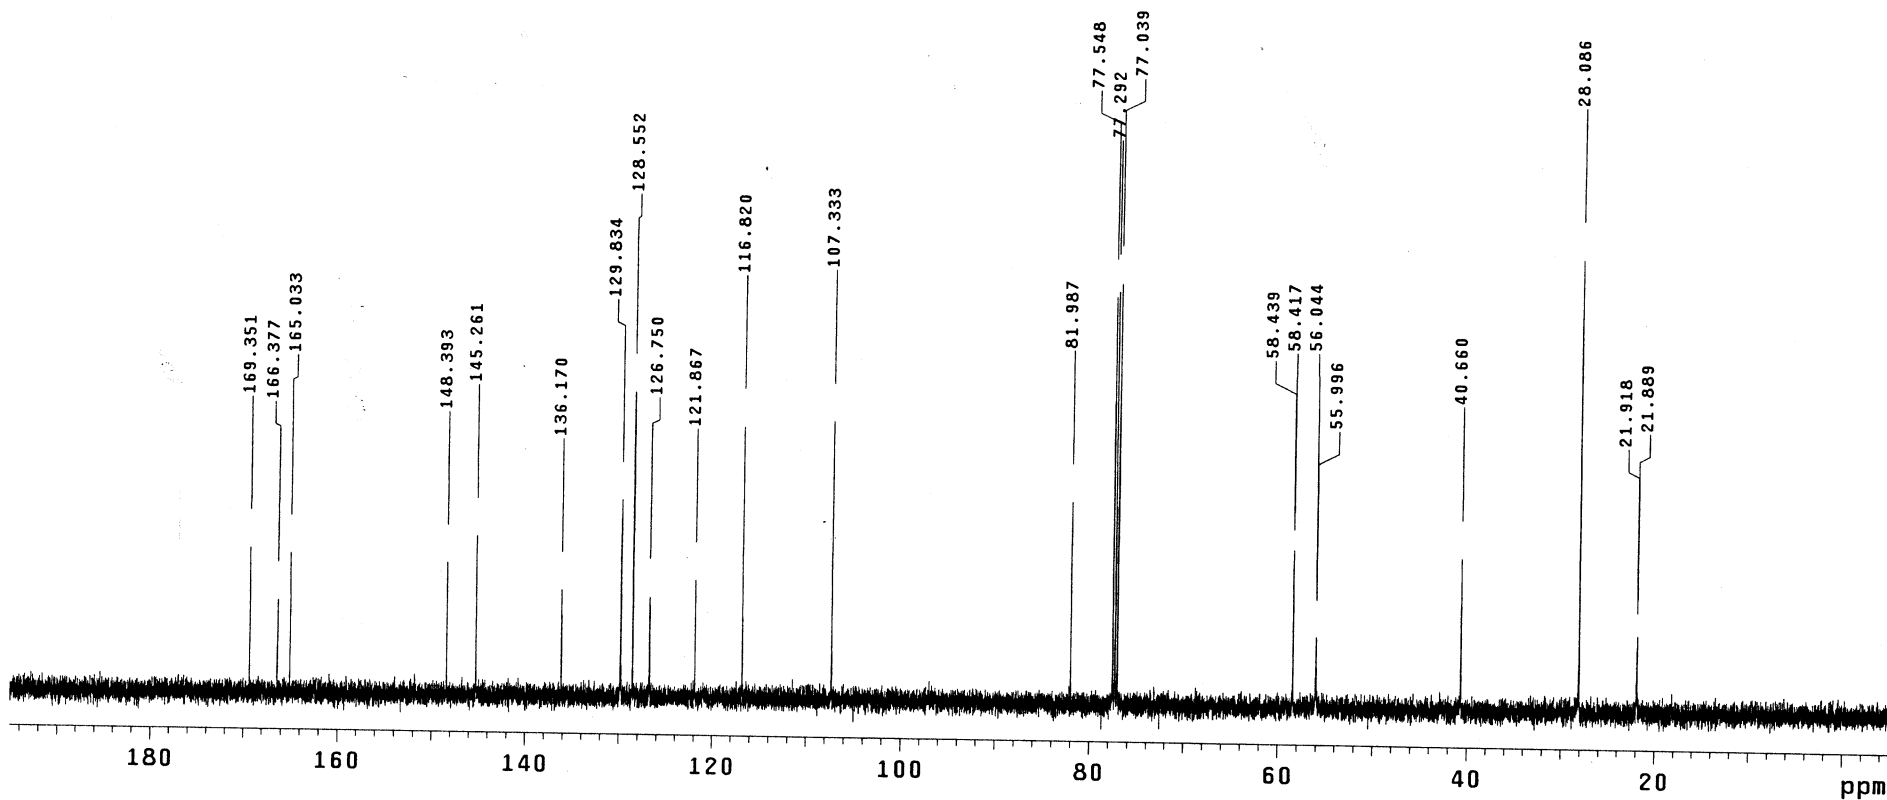

zc2-32

File: Proton

Pulse Sequence: s2pu1

Solvent: cdcl3  
Temp. 20.0 C / 293.1 K  
Operator: falck  
INOVA-500 "fire2.swmed.edu"

Relax. delay 1.000 sec  
Pulse 45.0 degrees  
Acq. time 2.048 sec  
Width 8000.0 Hz  
8 repetitions  
OBSERVE H1, 499.7778771 MHz  
DATA PROCESSING  
Line broadening 0.2 Hz  
FT size 65536  
Total time 0 min, 30 sec

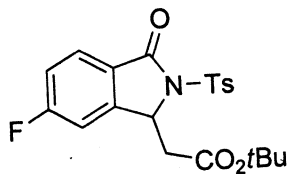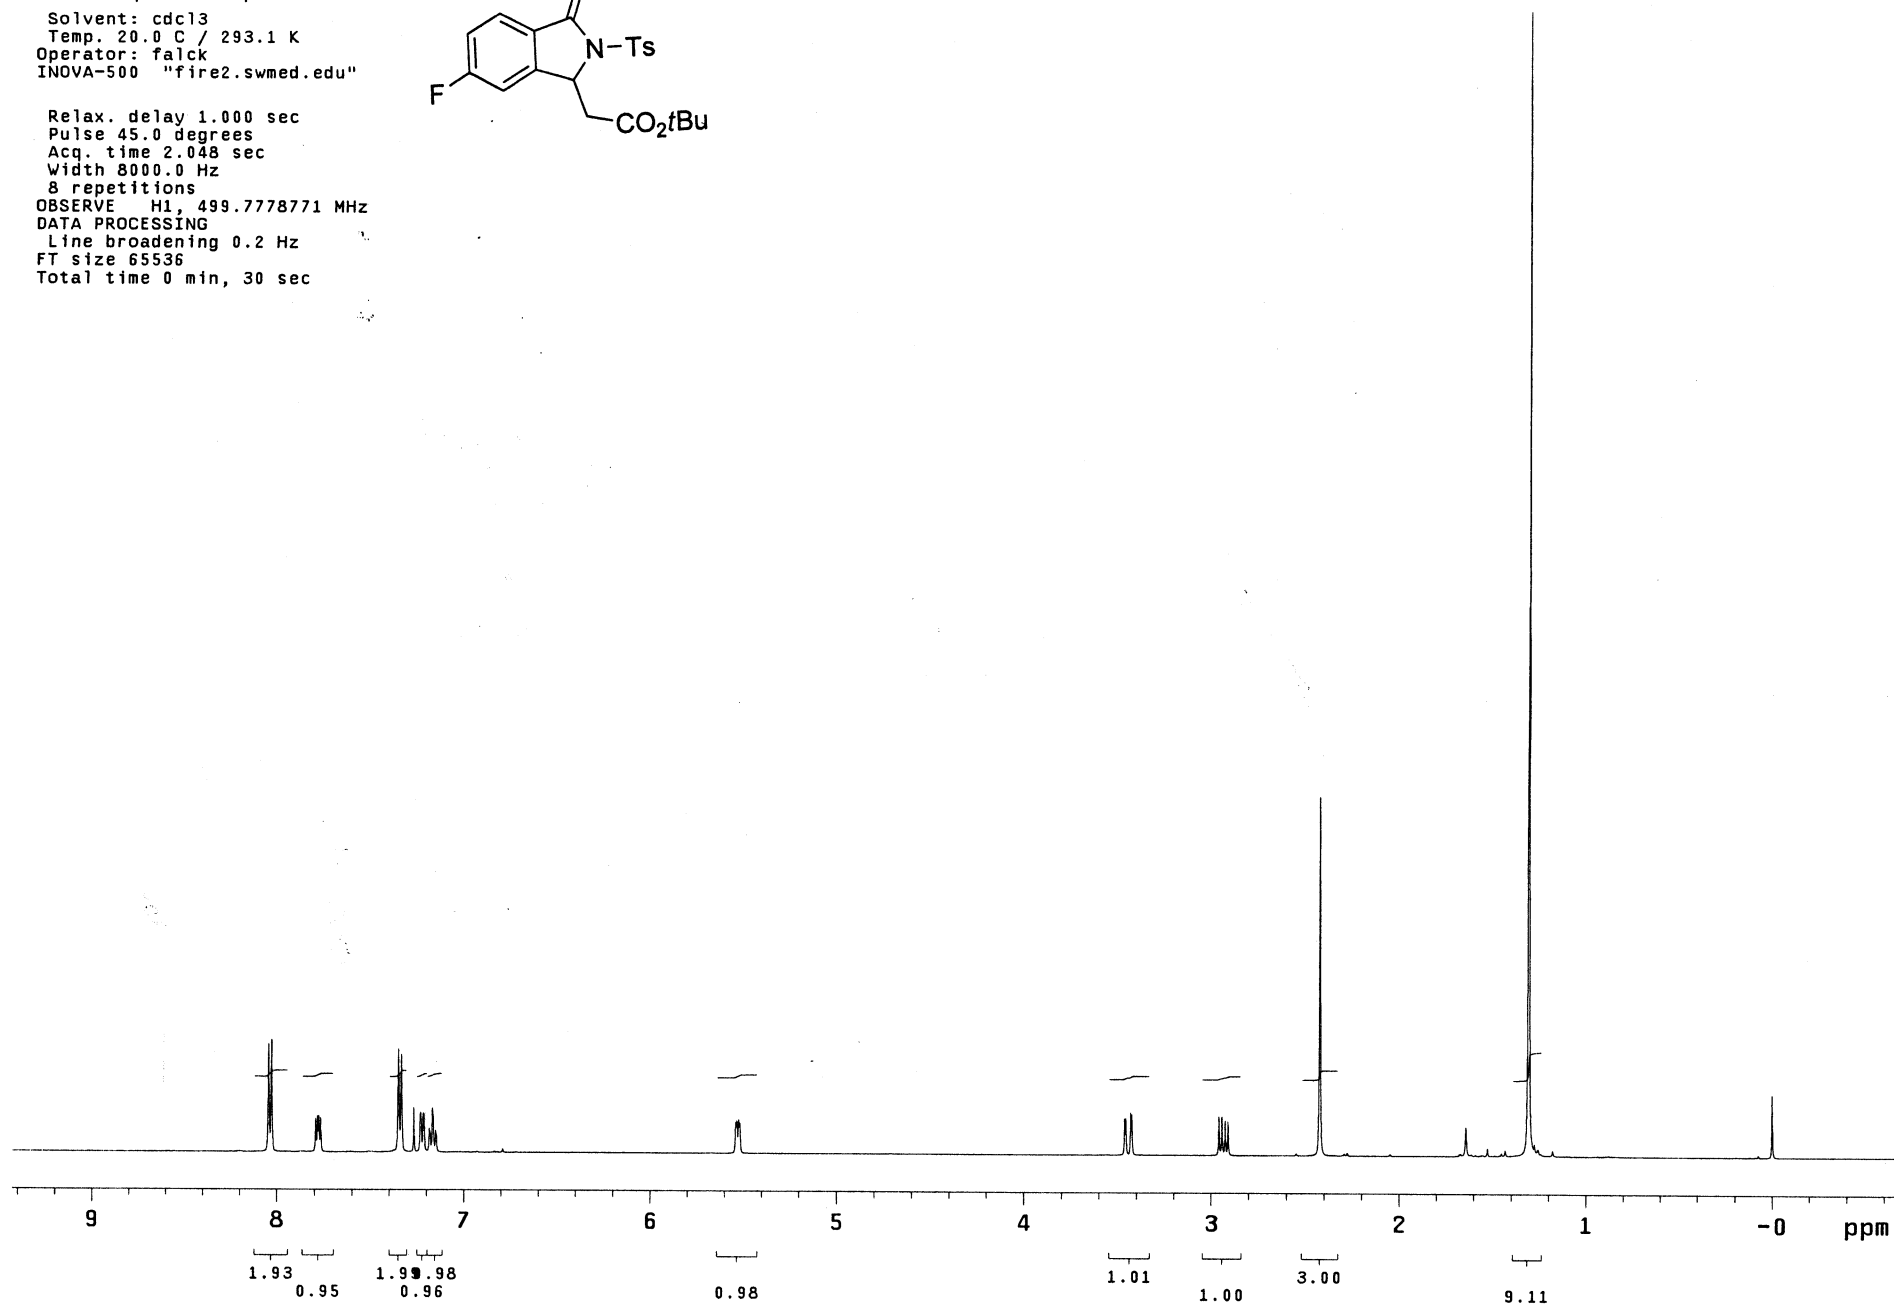

zc2-32

File: Carbon

Pulse Sequence: s2pu1

Solvent: cdcl3

Ambient temperature

Operator: falck

INOVA-500 "fire2.swmed.edu"

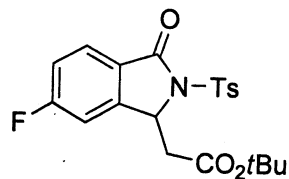

Relax. delay 1.000 sec  
Pulse 45.0 degrees  
Acq. time 1.300 sec  
Width 30165.9 Hz  
648 repetitions  
OBSERVE C13, 125.6692167 MHz  
DECOUPLE H1, 499.7803743 MHz  
Power 36 dB  
continuously on  
WALTZ-16 modulated  
DATA PROCESSING  
Line broadening 0.5 Hz  
FT size 131072  
Total time 38 min, 29 sec

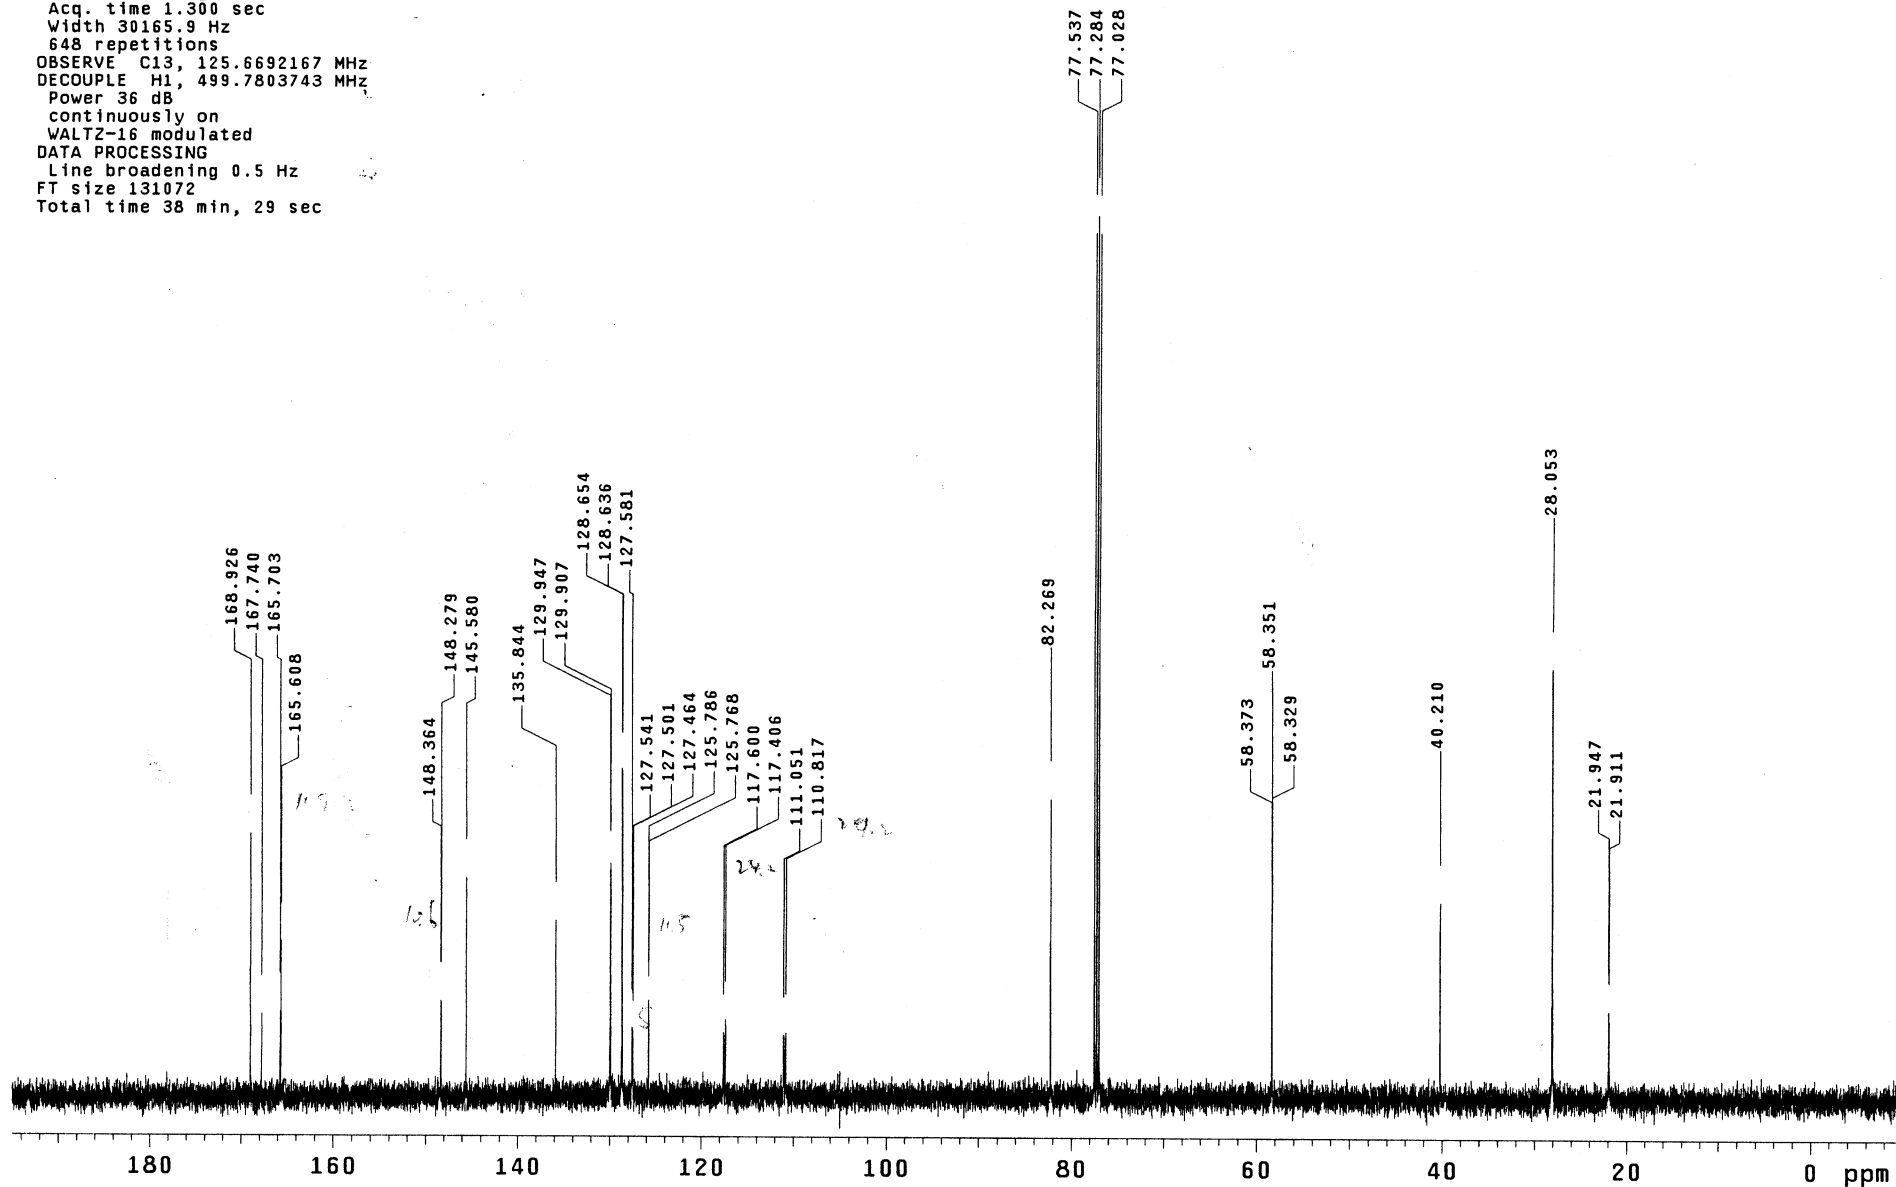



zc2-37

File: Proton

Pulse Sequence: s2pu1

Solvent: cdc13

Temp. 25.0 C / 298.1 K

Operator: falck

INOVA-500 "fire2.swmed.edu

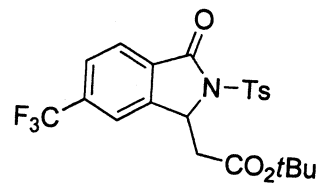

Relax. delay 1.000 sec  
Pulse 45.0 degrees  
Acq. time 2.049 sec  
Width 8000.0 Hz  
8 repetitions  
OBSERVE H1, 499.7778796 MHz  
DATA PROCESSING  
Line broadening 0.2 Hz  
FT size 65536  
Total time 0 min, 30 sec

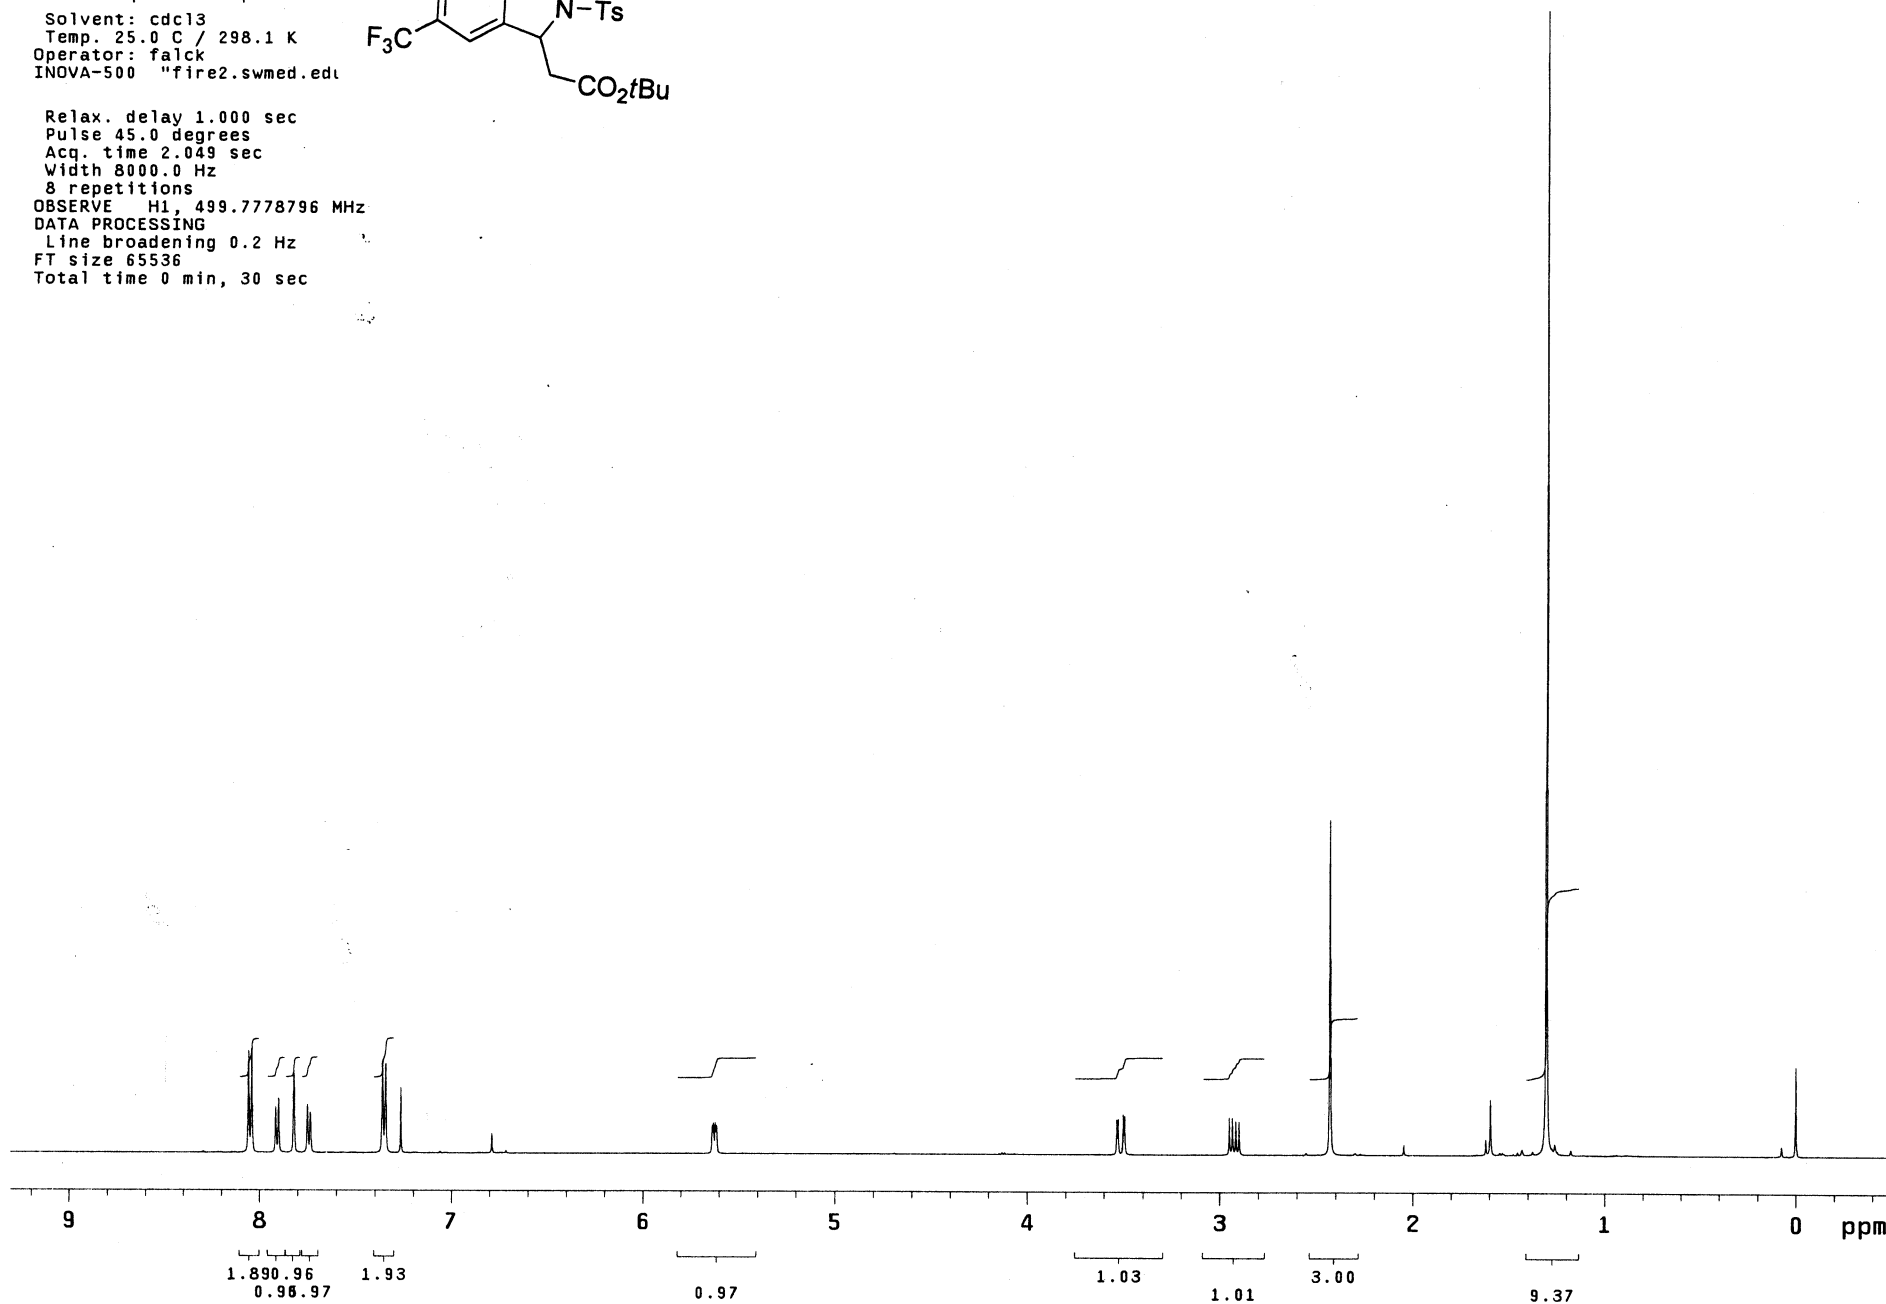

zc2-37

File: Carbon

Pulse Sequence: s2pu1

Solvent: cdcl3

Ambient temperature

Operator: falck

INOVA-400 "pele400"

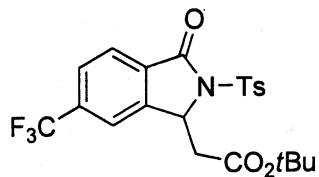

Relax. delay 1.000 sec  
Pulse 45.0 degrees  
Acq. time 1.300 sec  
Width 24125.5 Hz  
600 repetitions  
OBSERVE C13, 100.5245623 MHz  
DECOUPLE H1, 399.7813047 MHz  
Power 40 dB  
continuously on  
WALTZ-16 modulated  
DATA PROCESSING  
Line broadening 0.5 Hz  
FT size 65536  
Total time 38 min, 29 sec

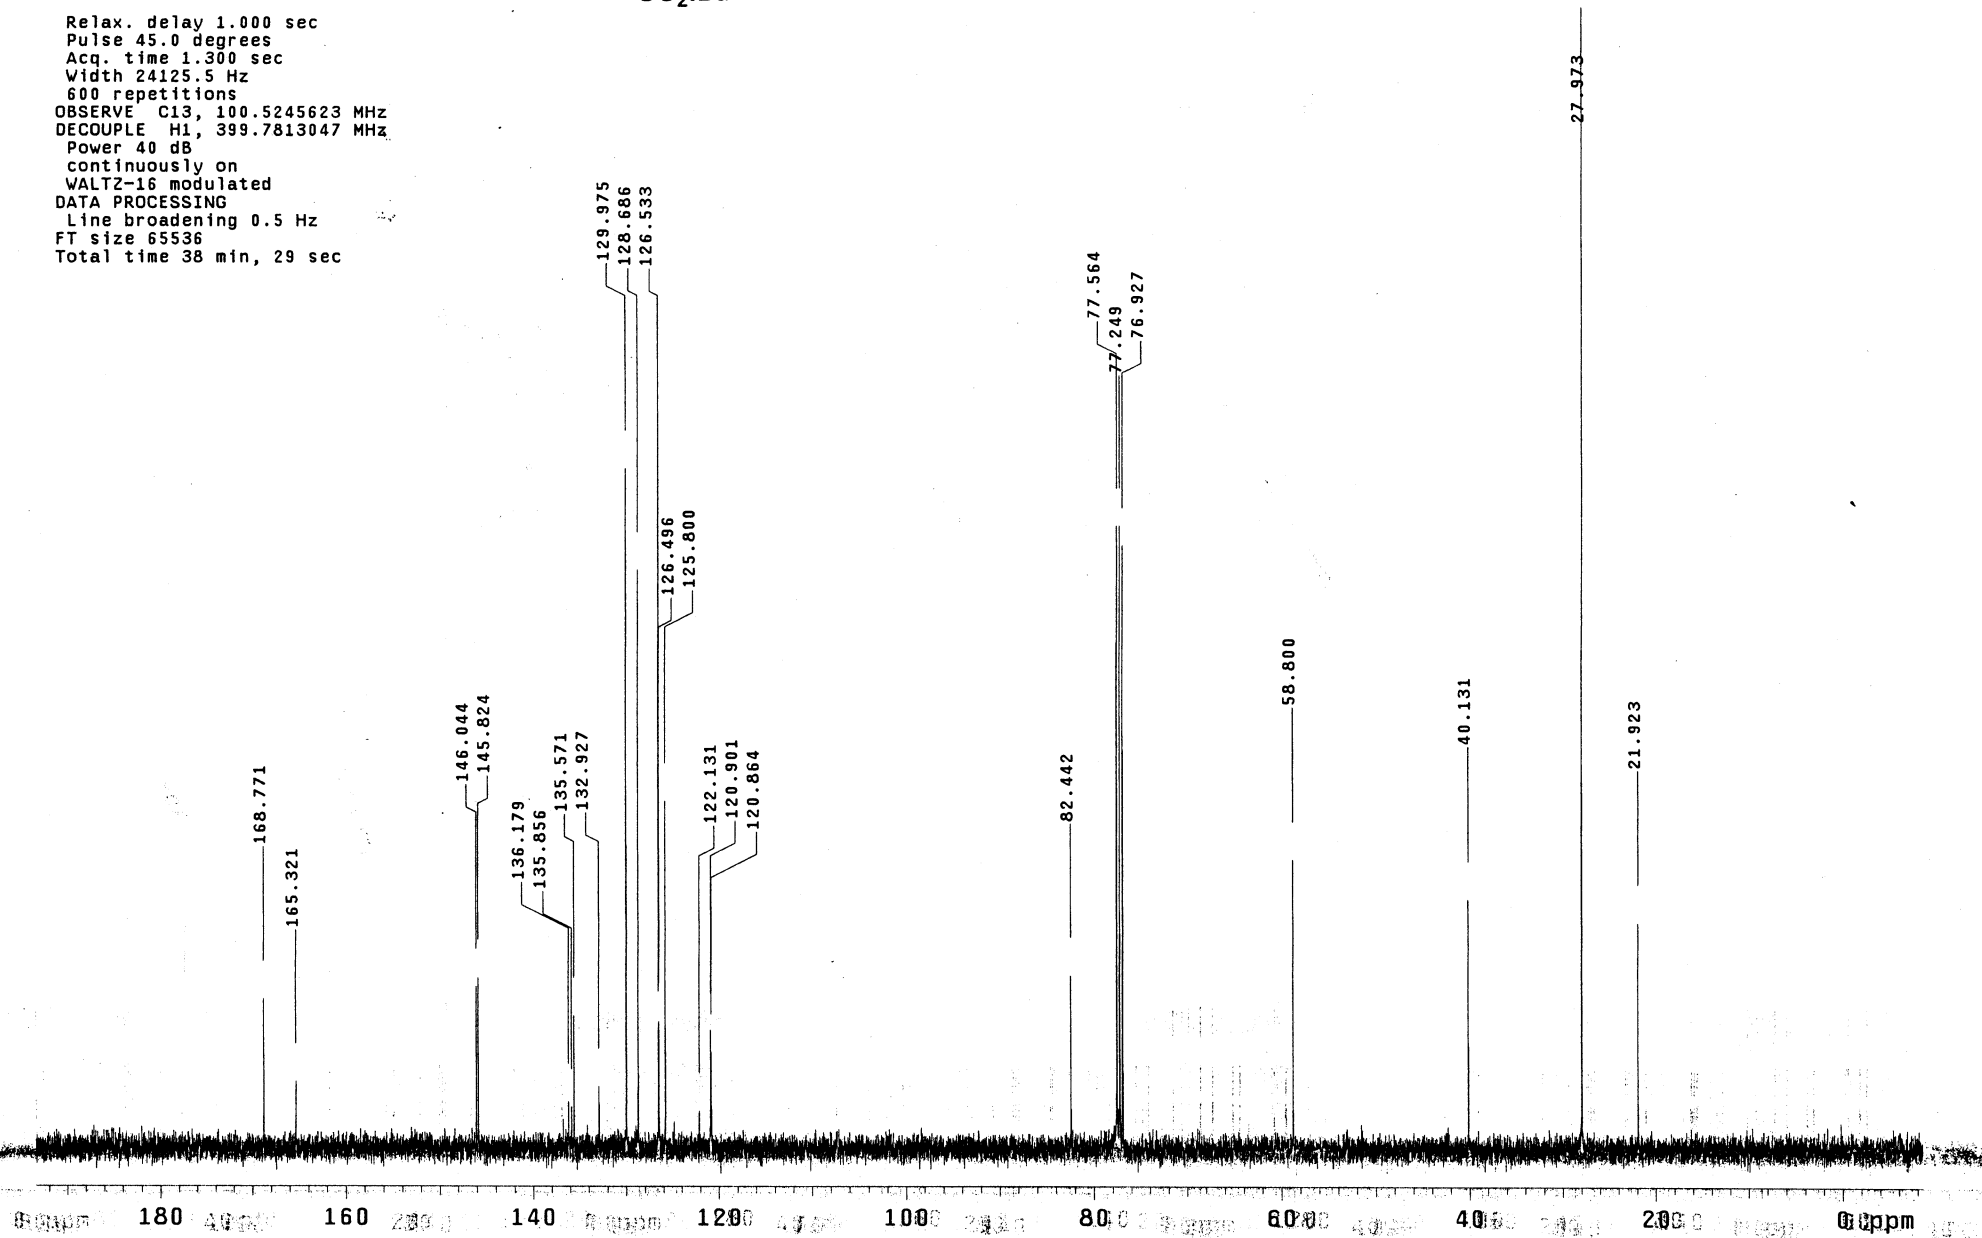

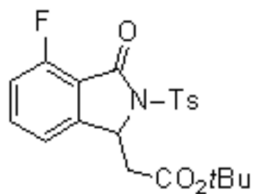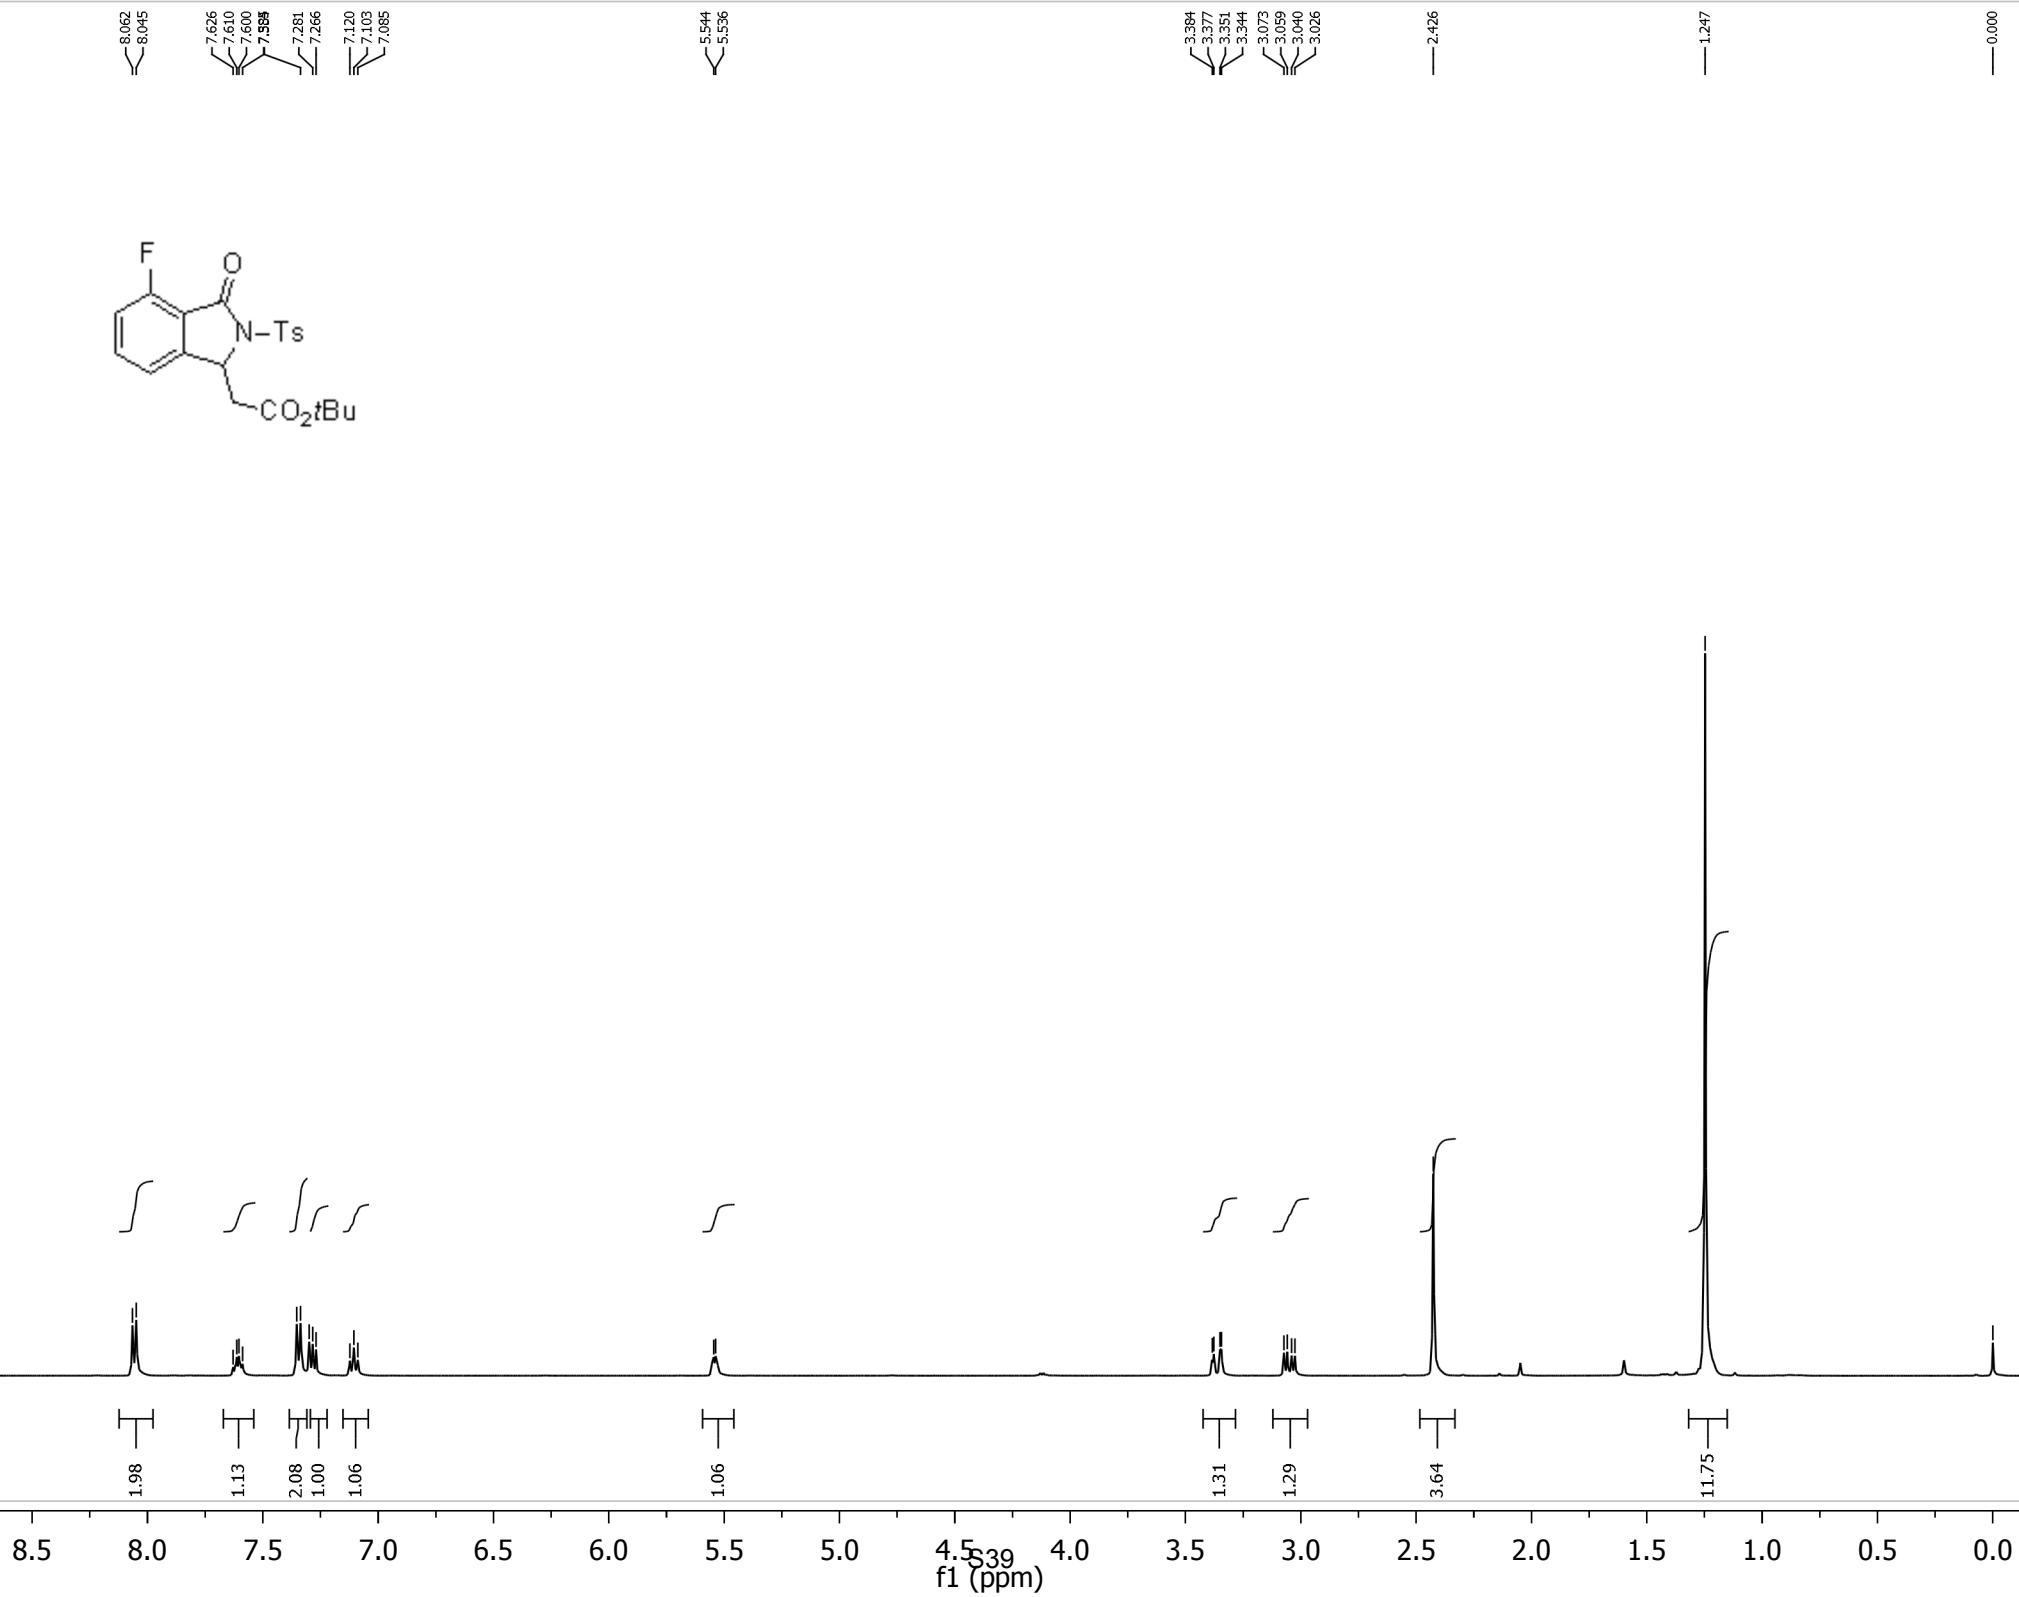

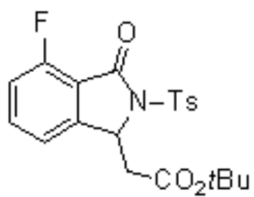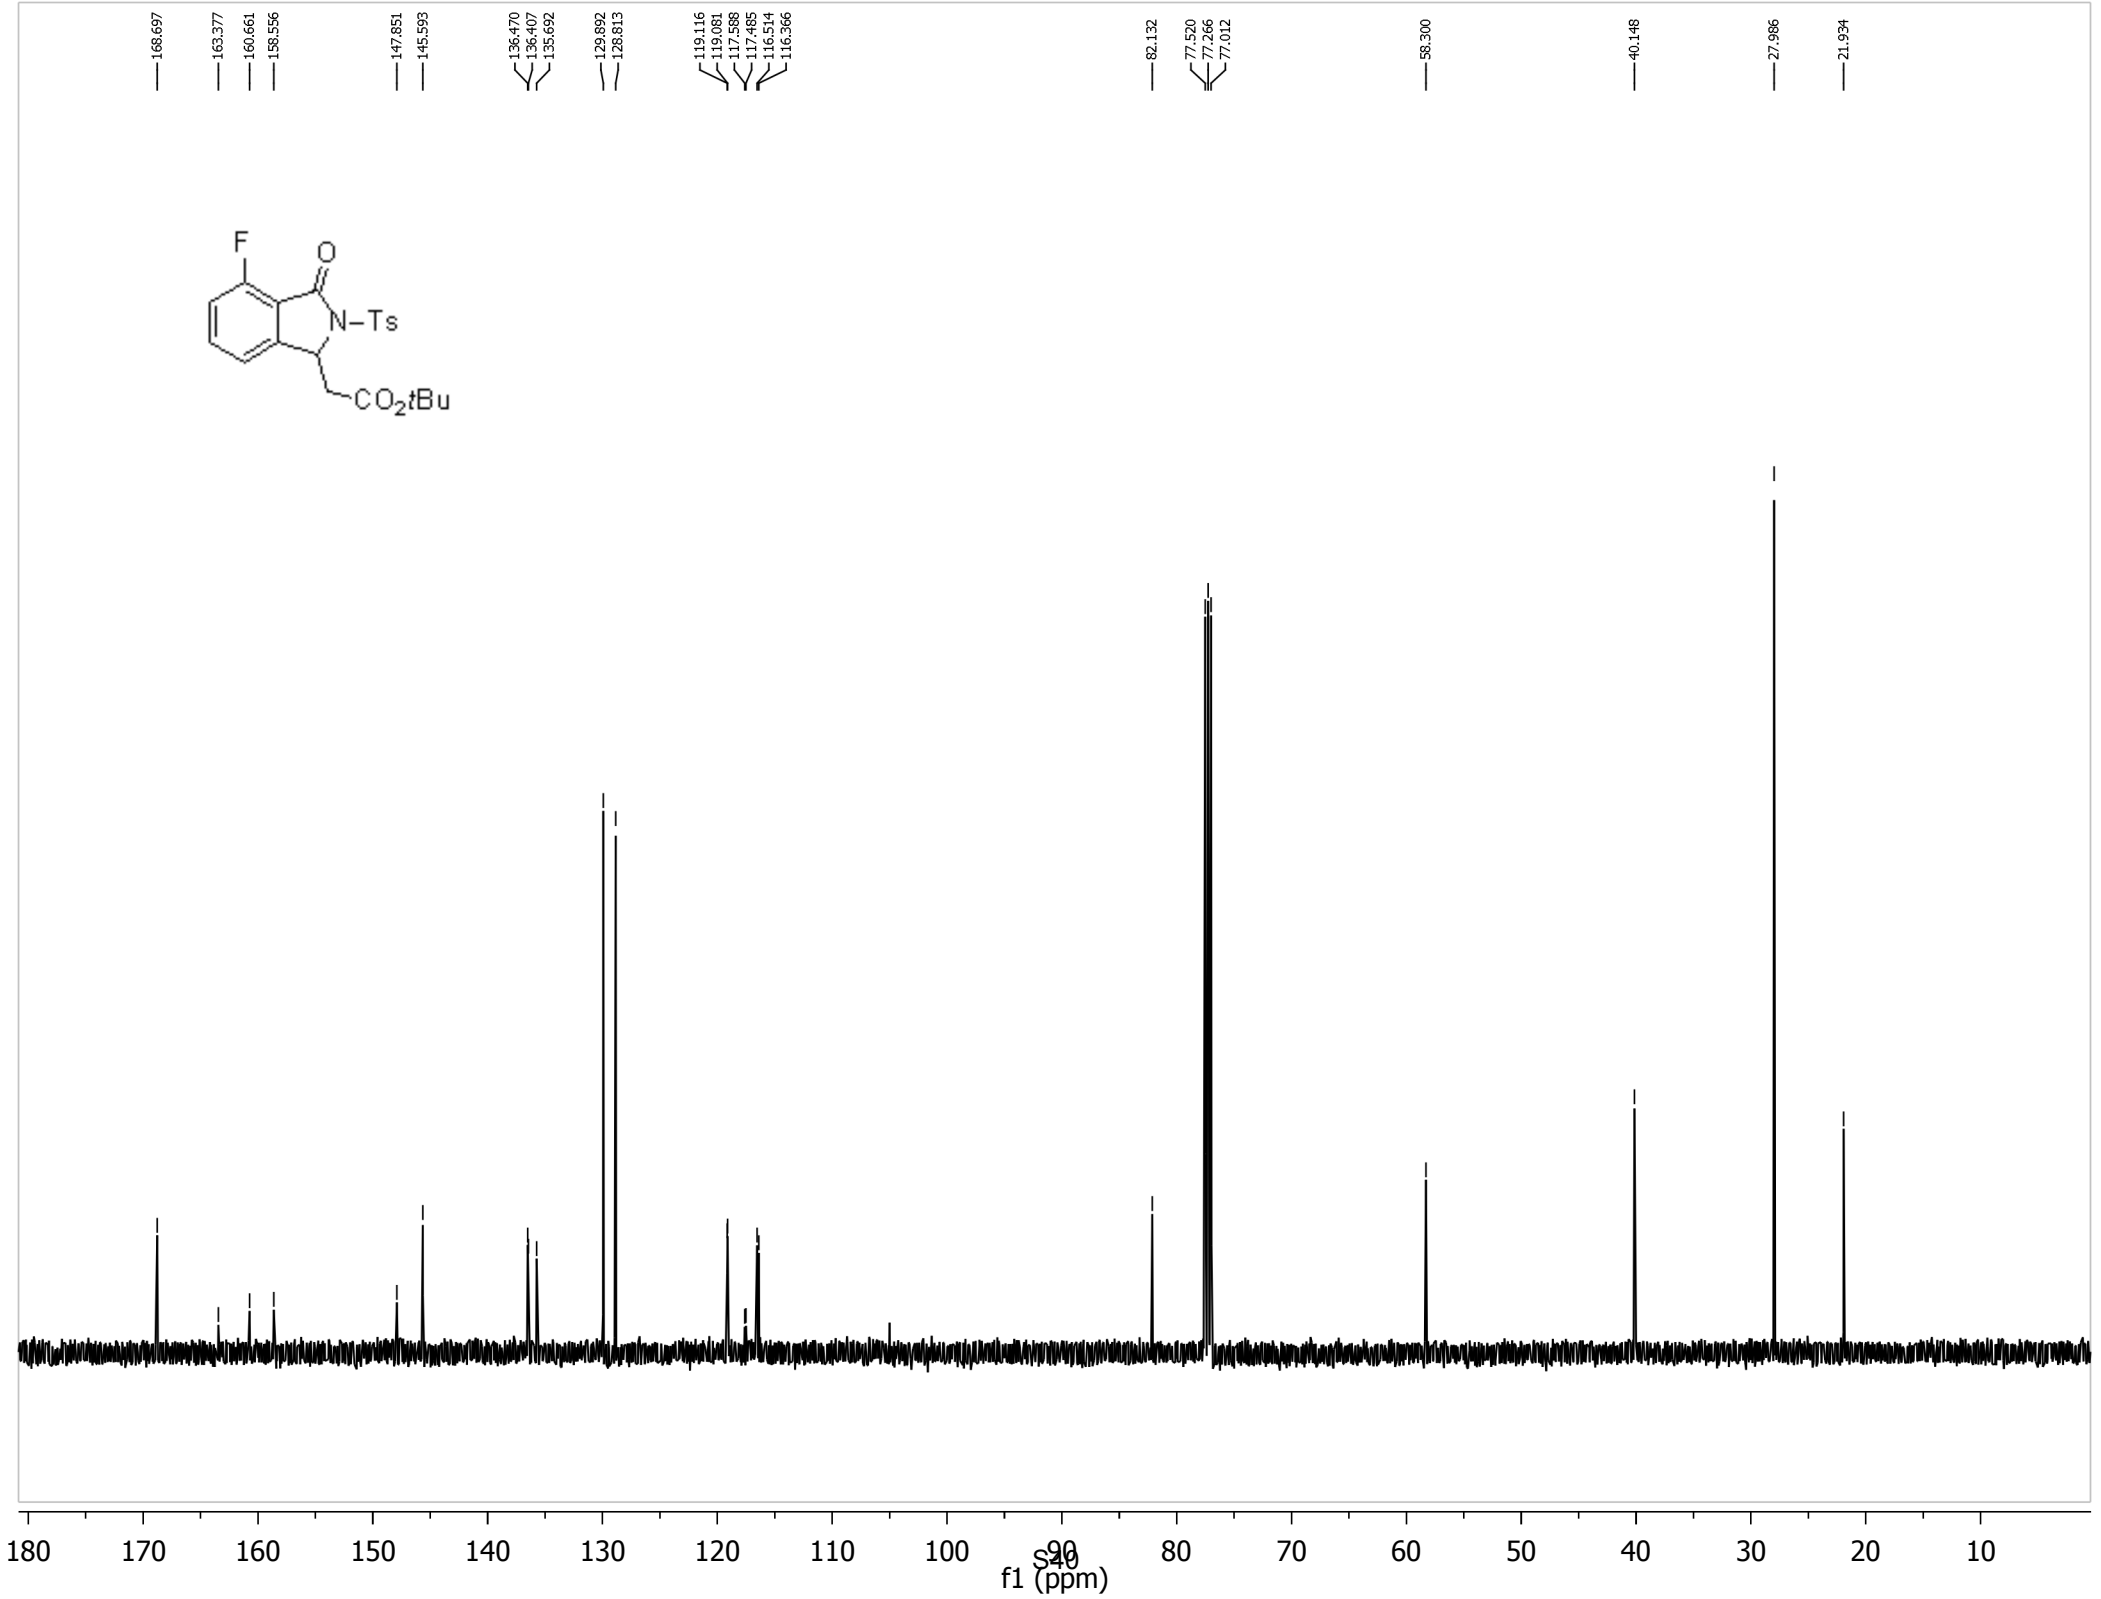

zc1-281

File: Proton

Pulse Sequence: s2pu1

Solvent: cdcl3

Ambient temperature

Operator: falck

INOVA-500 "fire2.swmed.edu"

Relax. delay 1.000 sec

Pulse 45.0 degrees

Acq. time 2.049 sec

Width 8000.0 Hz

8 repetitions

OBSERVE H1, 499.7778768 MHz

DATA PROCESSING

Line broadening 0.2 Hz

FT size 65536

Total time 0 min, 30 sec

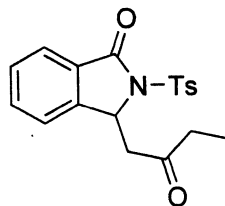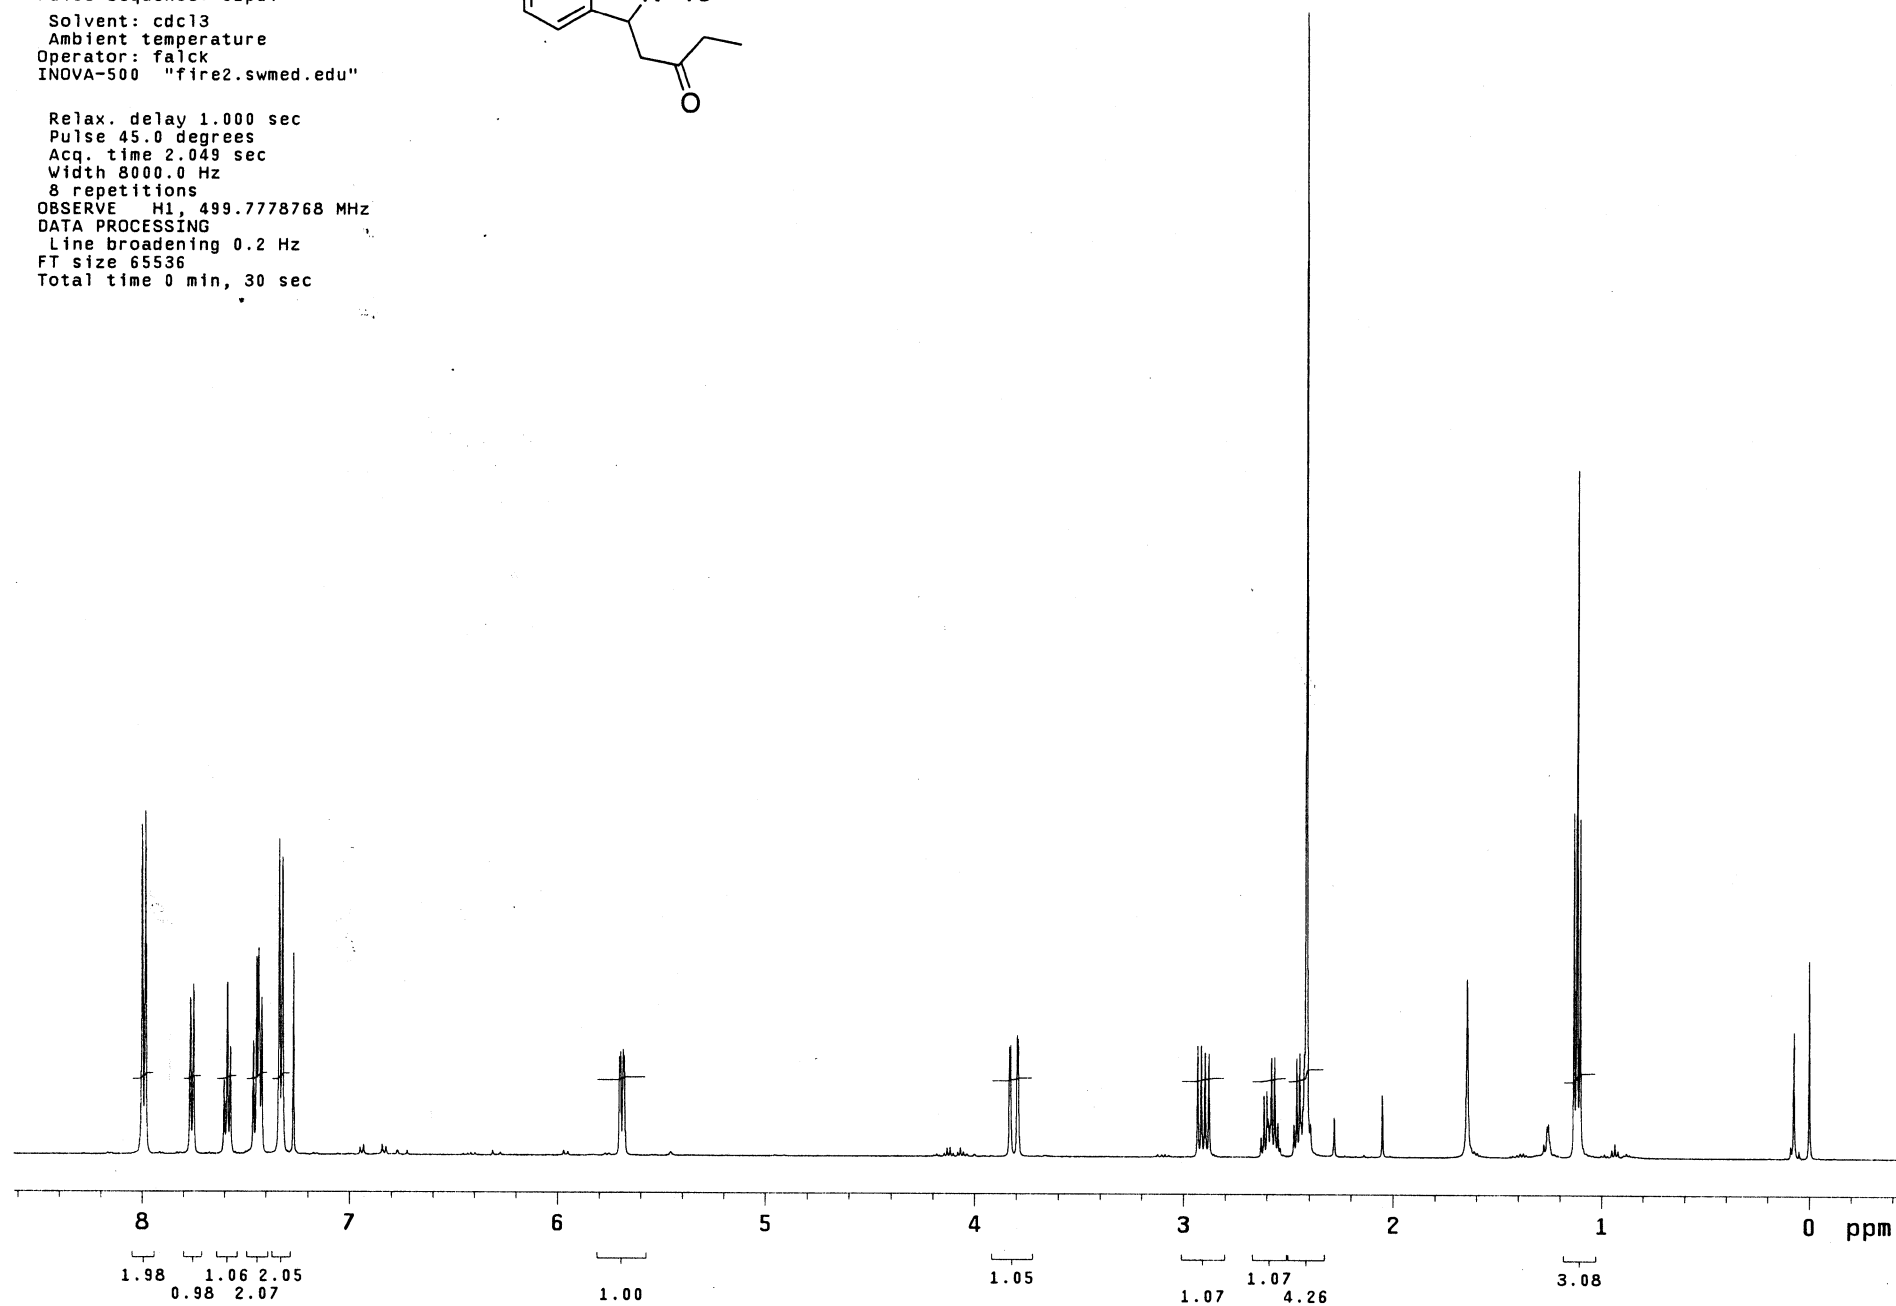

zcl-281

File: Carbon

Pulse Sequence: s2pu1

Solvent: cdcl3

Ambient temperature

Operator: falck

INOVA-500 "fire2.swmed.edu"

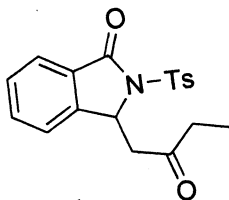

Relax. delay 1.000 sec  
Pulse 45.0 degrees  
Acq. time 1.300 sec  
Width 30165.9 Hz  
488 repetitions  
OBSERVE C13, 125.6692167 MHz  
DECOUPLE H1, 499.7803743 MHz  
Power 44 dB  
continuously on  
WALTZ-16 modulated  
DATA PROCESSING  
Line broadening 0.5 Hz  
FT size 131072  
Total time 6 hr, 24 min, 53 sec

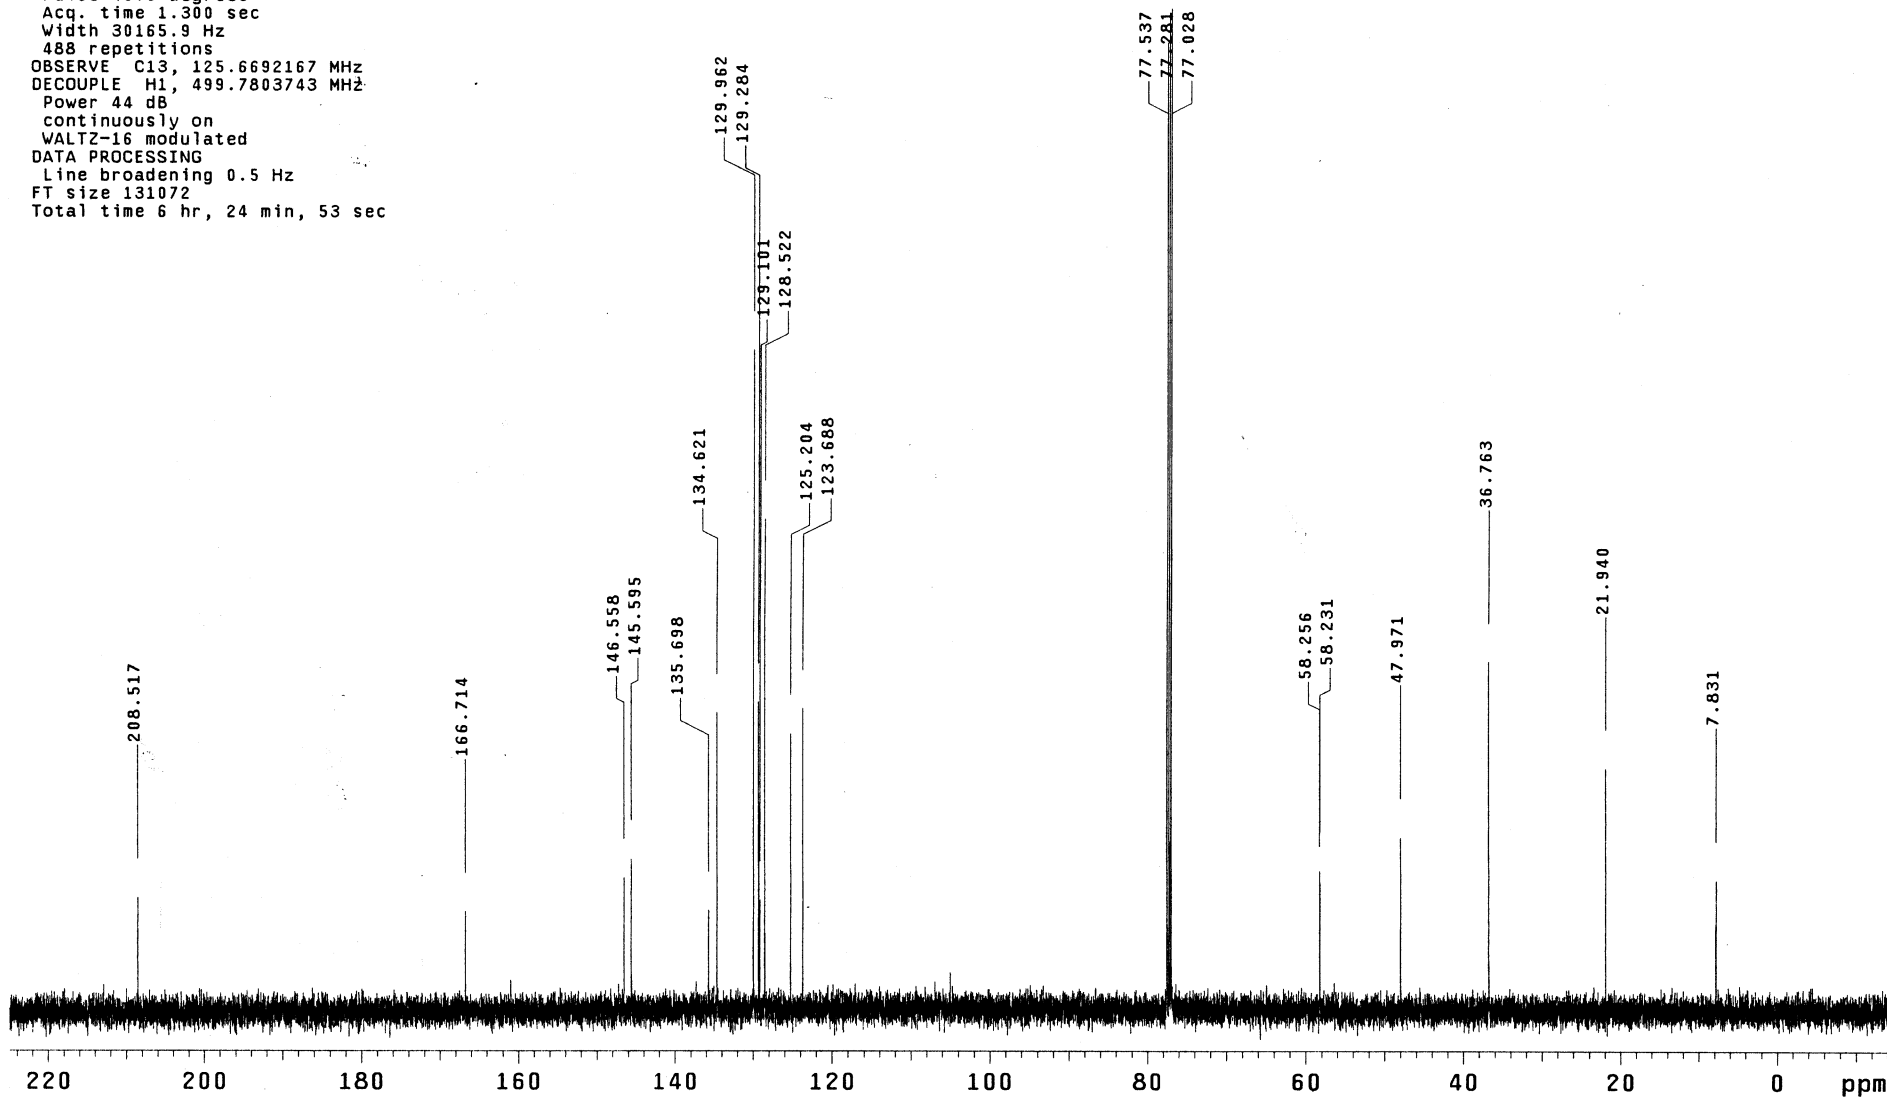

zc2-53

File: Proton

Pulse Sequence: s2pu1

Solvent: cdc13  
Temp. 20.0 C / 293.1 K

Operator: falck  
INOVA-500 "fire2.swmed.edu"

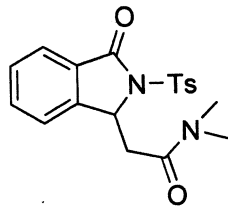

Relax. delay 1.000 sec  
Pulse 45.0 degrees  
Acq. time 2.048 sec  
Width 8000.0 Hz  
8 repetitions  
OBSERVE H1, 499.7778768 MHz  
DATA PROCESSING  
Line broadening 0.2 Hz  
FT size 65536  
Total time 0 min, 30 sec

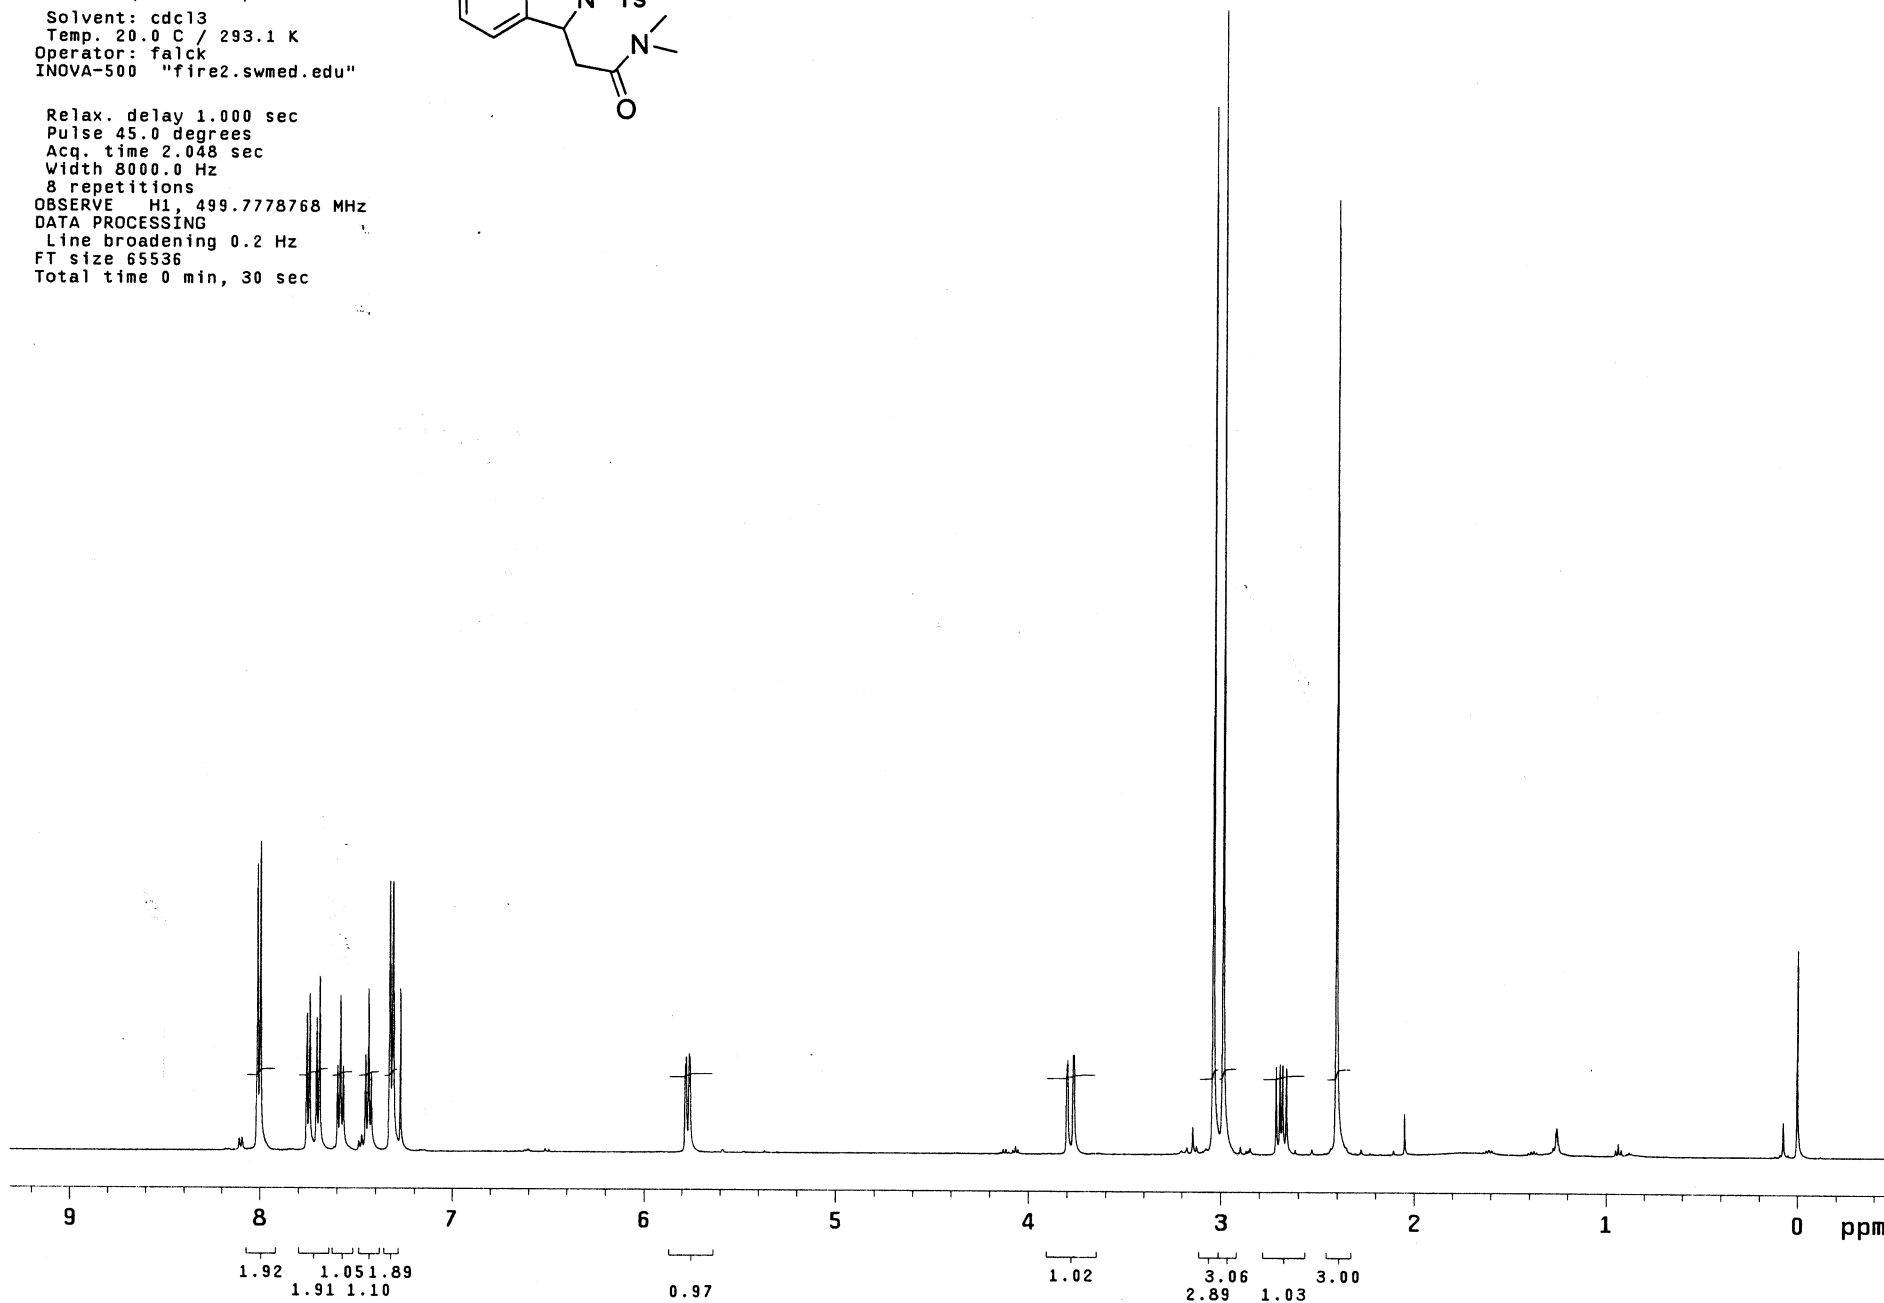

169.506  
166.898

146.925  
145.503

135.726  
134.570

129.901  
129.194  
128.962  
128.531  
124.987  
124.678

77.528  
77.274  
77.019

59.807

39.897  
37.404  
35.731

21.902

| Parameter                 | Value               |
|---------------------------|---------------------|
| 1 Title                   | zc2-53              |
| 2 Origin                  | inova               |
| 3 Owner                   |                     |
| 4 Solvent                 | cdcl3               |
| 5 Pulse Sequence          | s2pul               |
| 6 Acquisition Date        | 2010-06-17T11:47:13 |
| 7 Modification Date       |                     |
| 8 Temperature             | 20.0                |
| 9 Number of Scans         | 1000                |
| 10 Spectrometer Frequency | 125.68              |
| 11 Spectral Width         | 30165.9             |
| 12 Lowest Frequency       | -1887.7             |
| 13 Nucleus                | 13C                 |
| 14 Acquired Size          | 39230               |
| 15 Spectral Size          | 131072              |

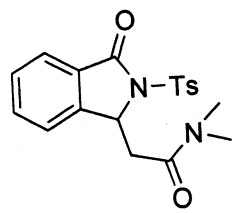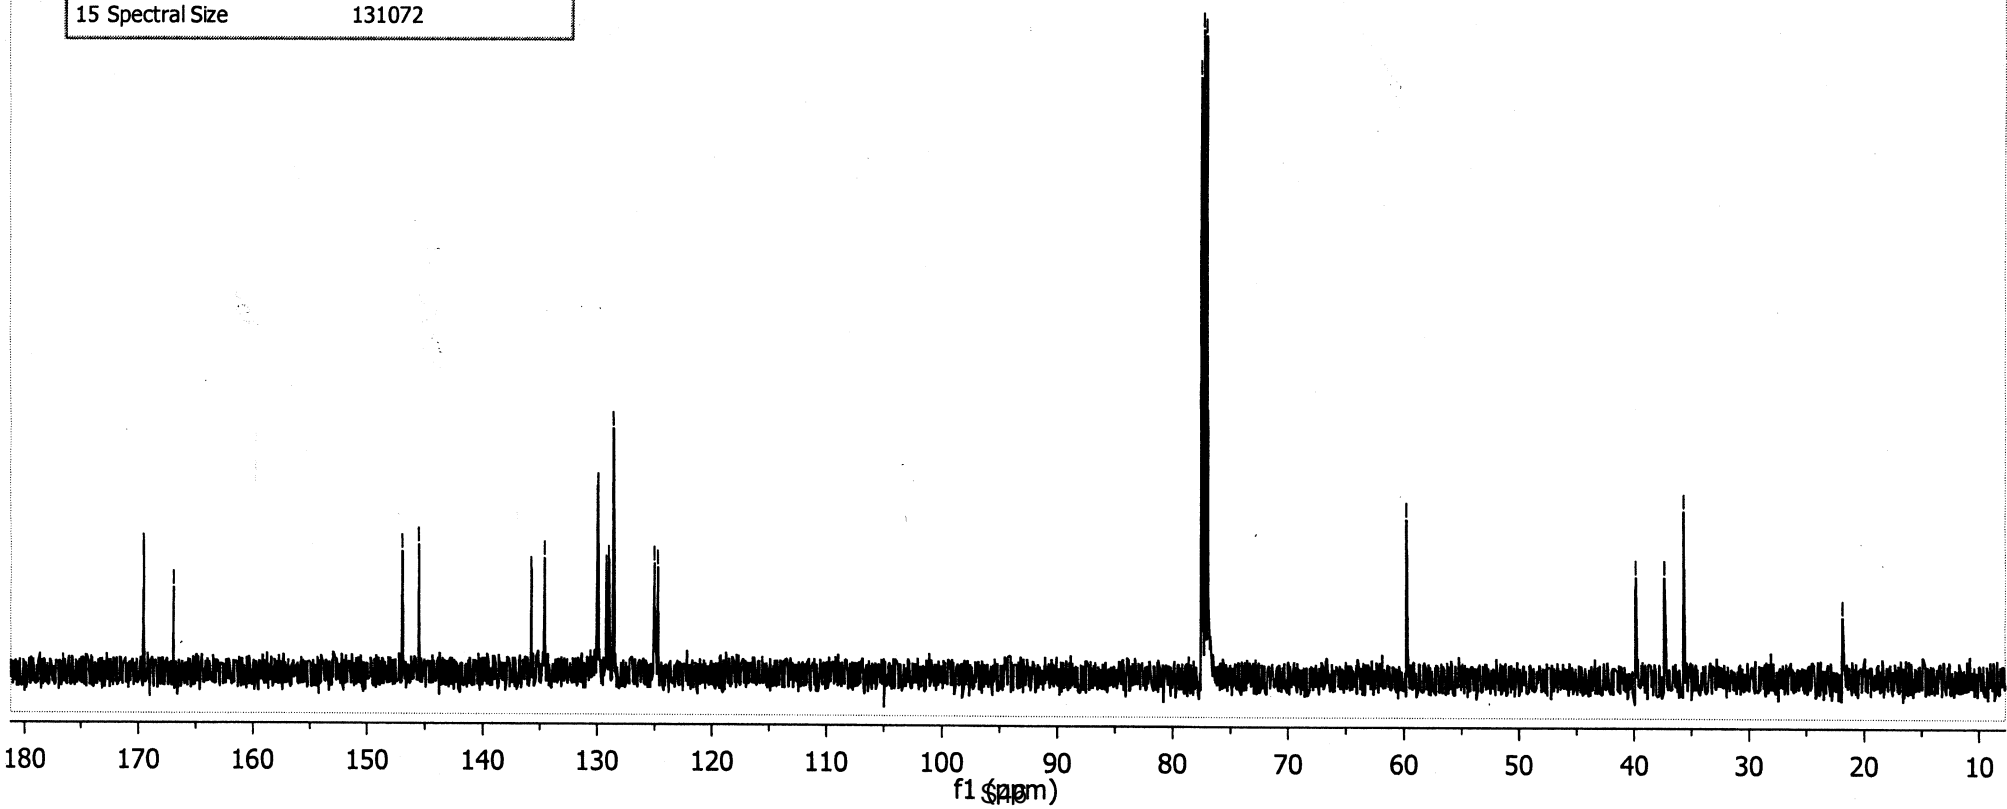



| Parameter                | Value          |
|--------------------------|----------------|
| 1 Title                  | Std proton     |
| 2 Origin                 | inova          |
| 3 Solvent                | cdcl3          |
| 4 Pulse Sequence         | s2pul          |
| 5 Temperature            | 50.0           |
| 6 Number of Scans        | 16             |
| 7 Spectrometer Frequency | 499.78         |
| 8 Spectral Width         | 8000.0         |
| 9 Lowest Frequency       | -1001.4        |
| 10 Nucleus               | <sup>1</sup> H |
| 11 Acquired Size         | 16389          |
| 12 Spectral Size         | 65536          |

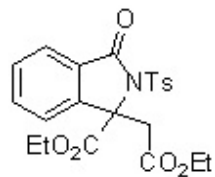

**3i**

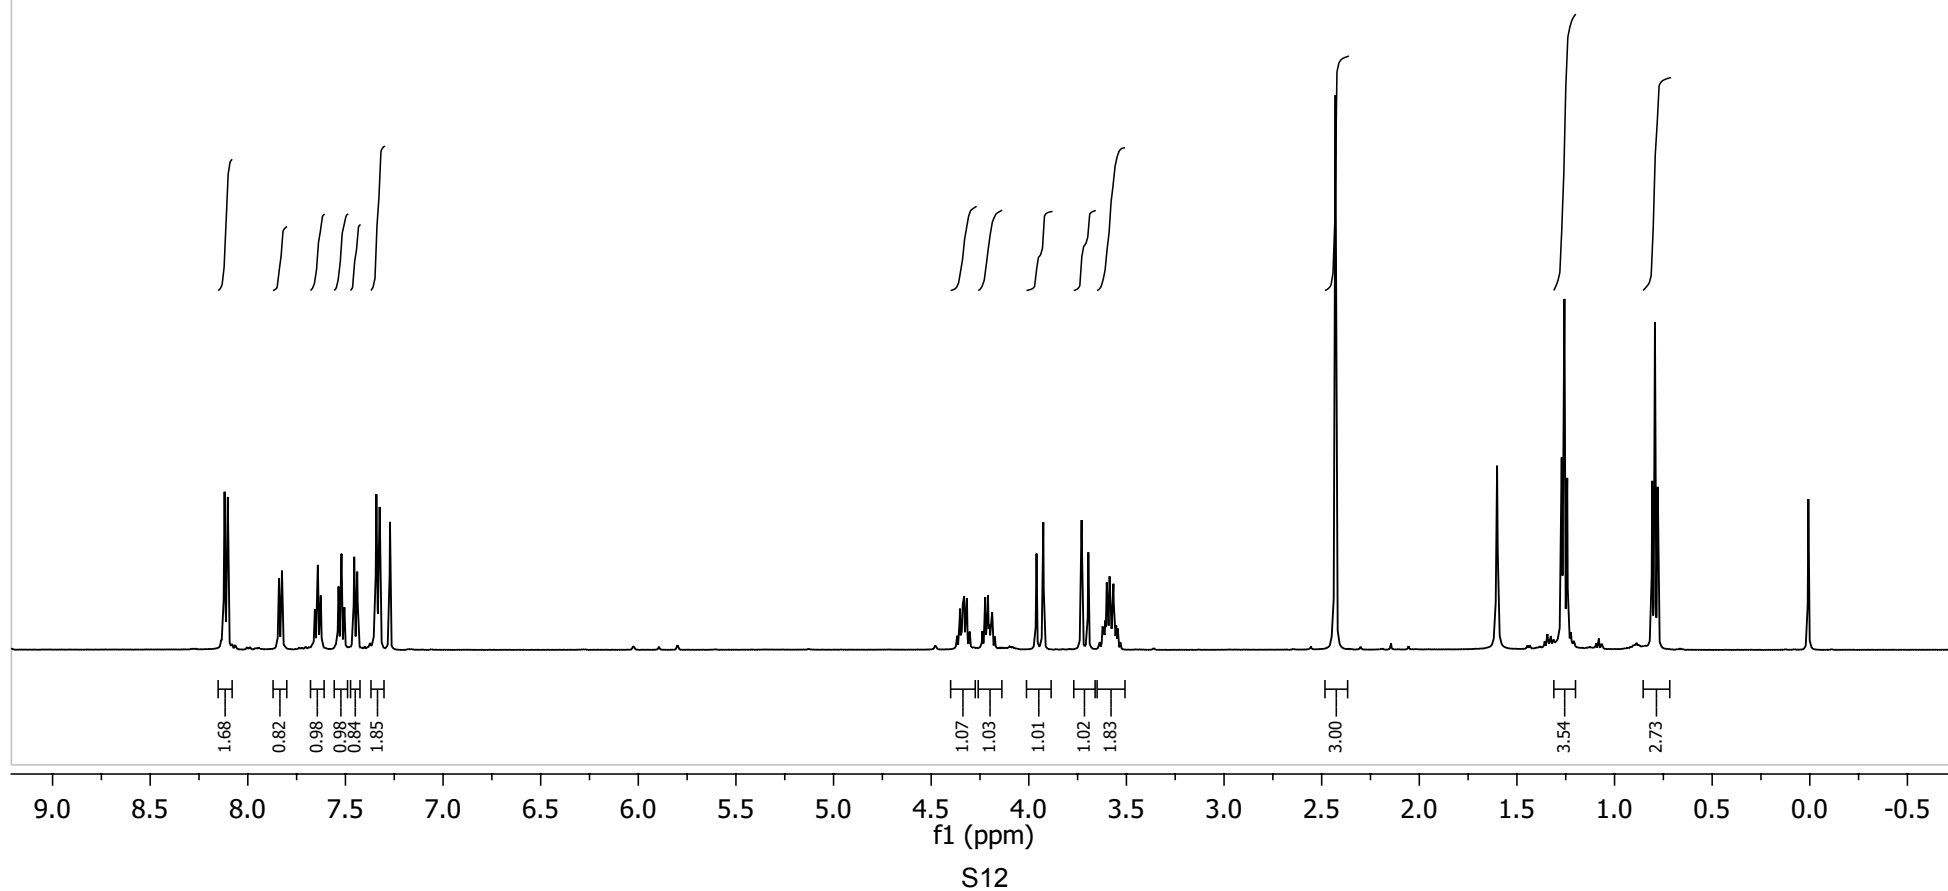

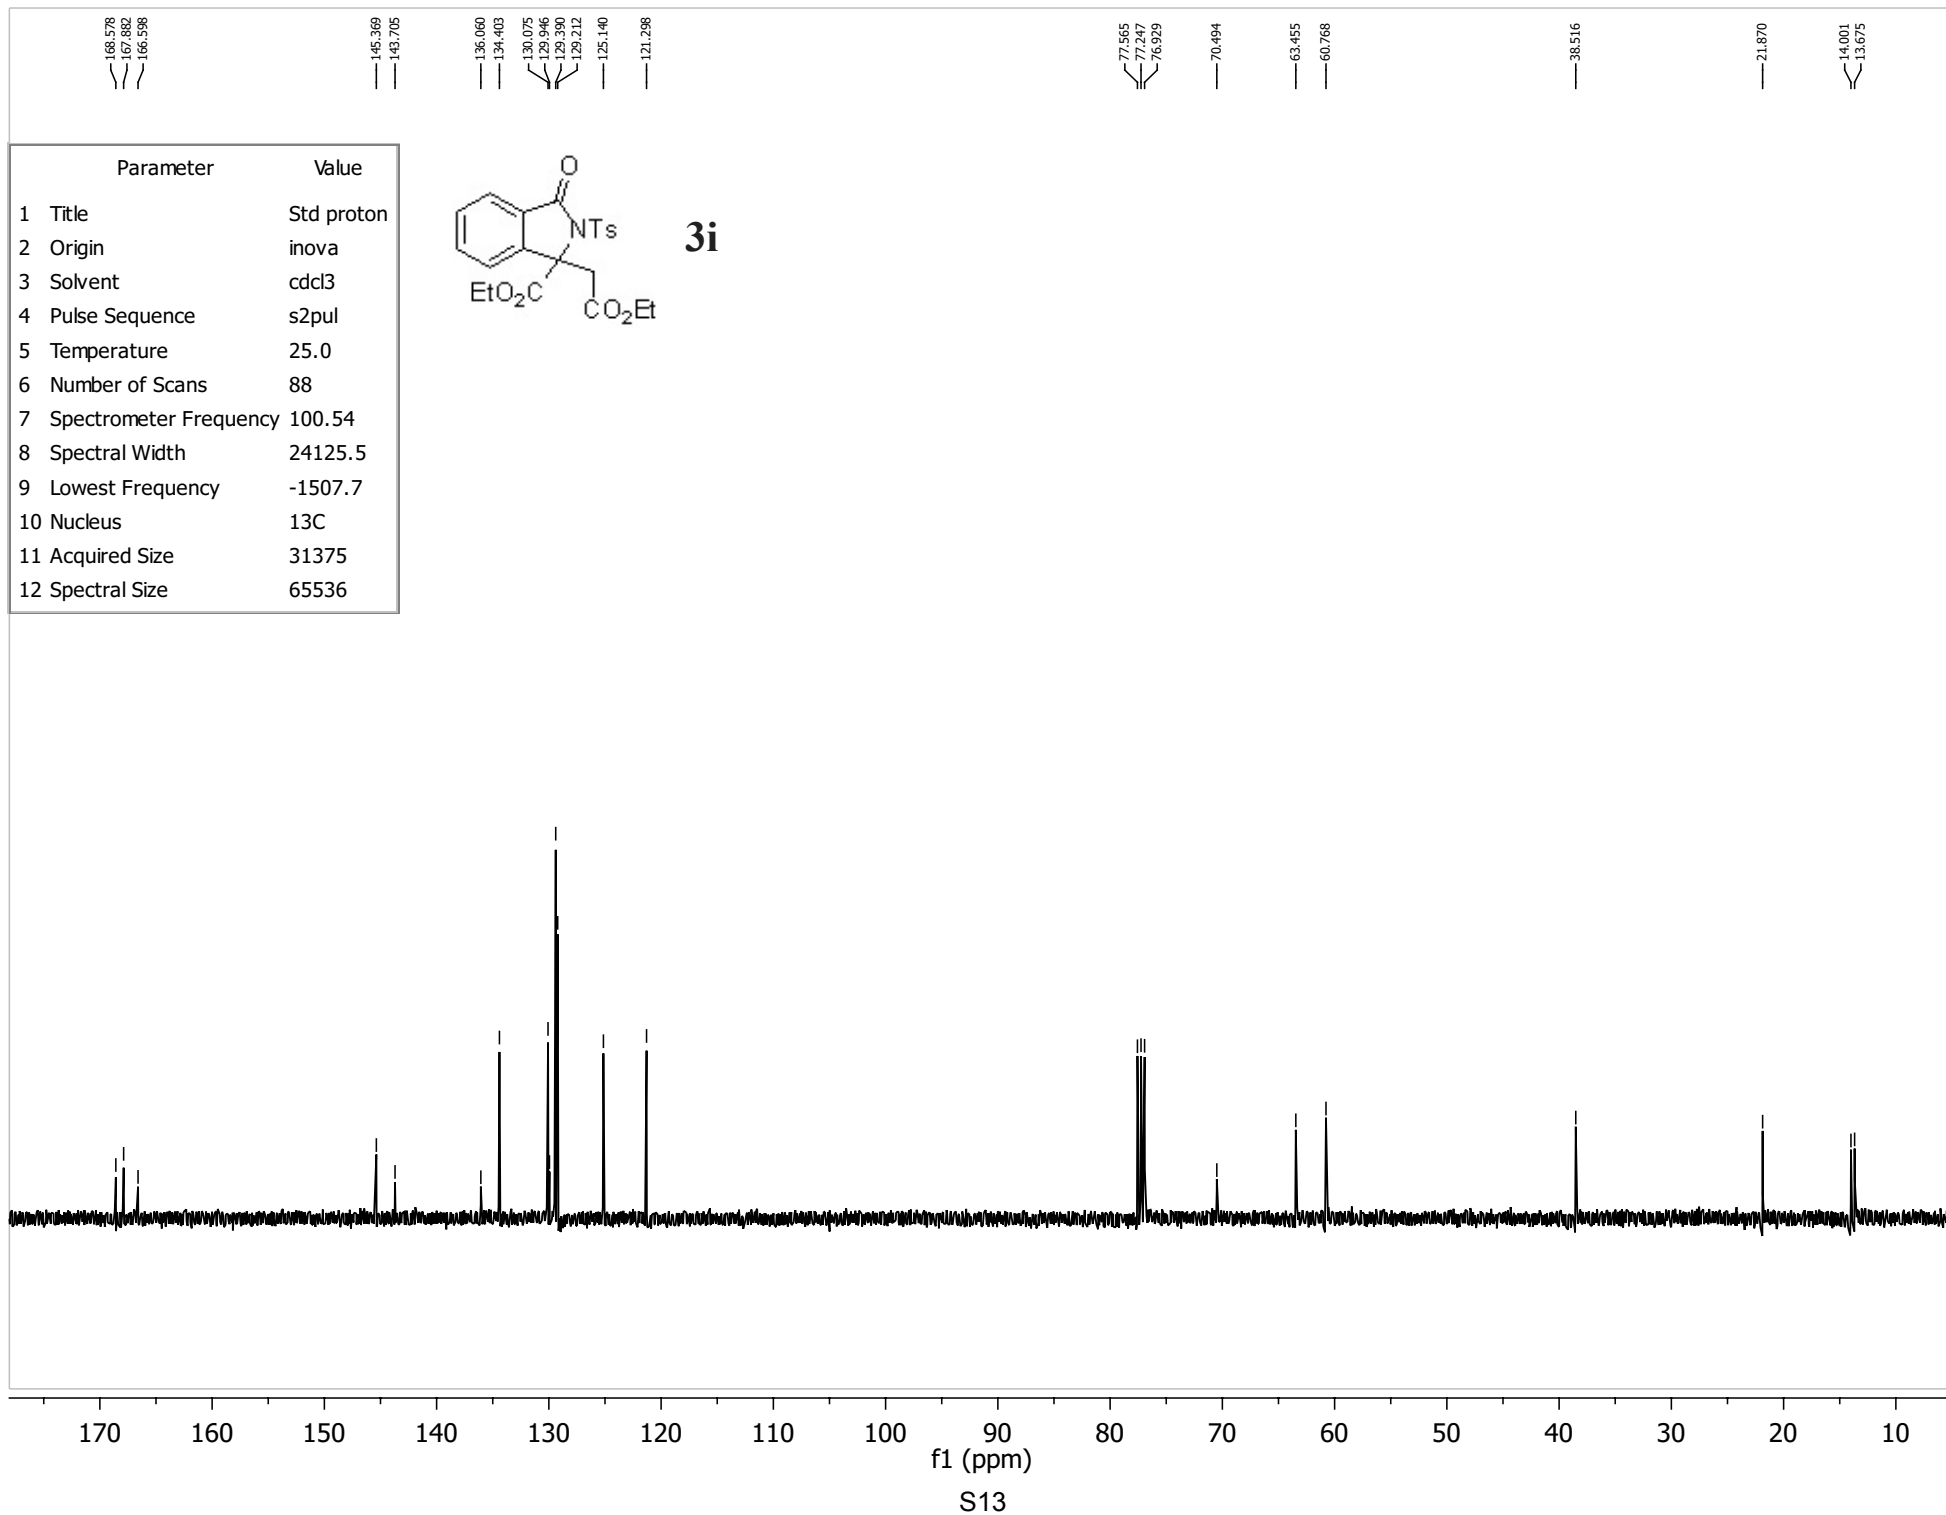

| Parameter                | Value      |
|--------------------------|------------|
| 1 Title                  | Std proton |
| 2 Origin                 | inova      |
| 3 Solvent                | cdcl3      |
| 4 Pulse Sequence         | s2pul      |
| 5 Temperature            | 50.0       |
| 6 Number of Scans        | 16         |
| 7 Spectrometer Frequency | 399.78     |
| 8 Spectral Width         | 6396.4     |
| 9 Lowest Frequency       | -799.5     |
| 10 Nucleus               | 1H         |
| 11 Acquired Size         | 13104      |
| 12 Spectral Size         | 32768      |

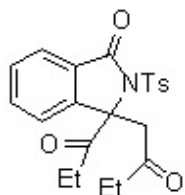

**3j**

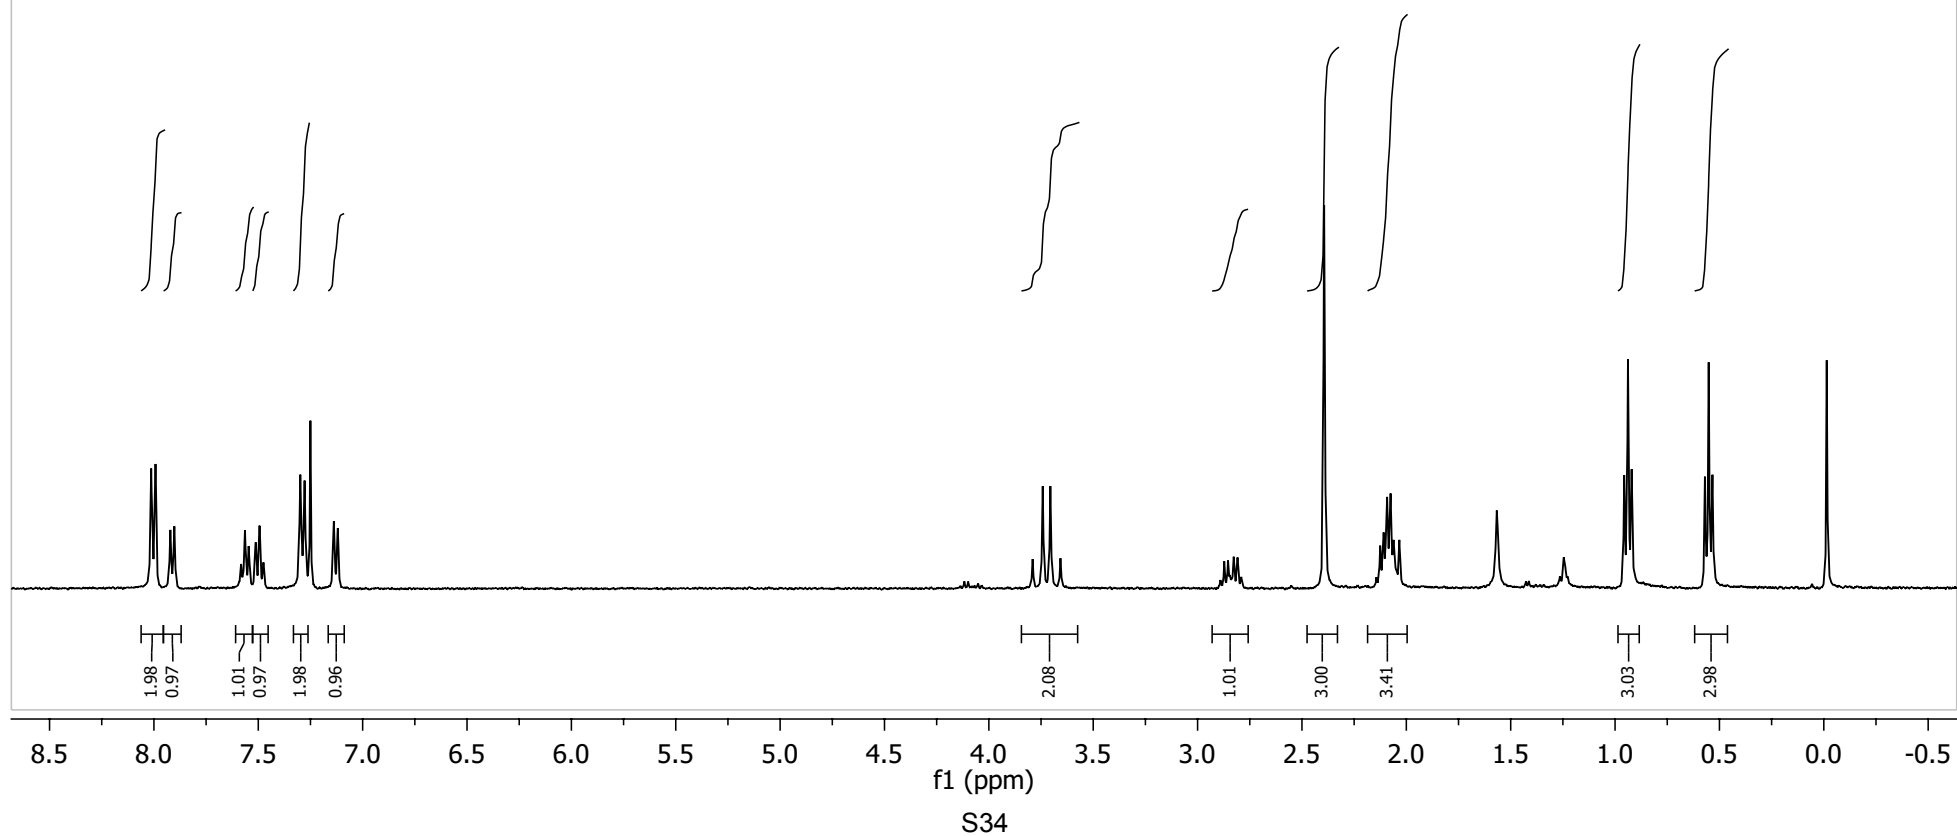

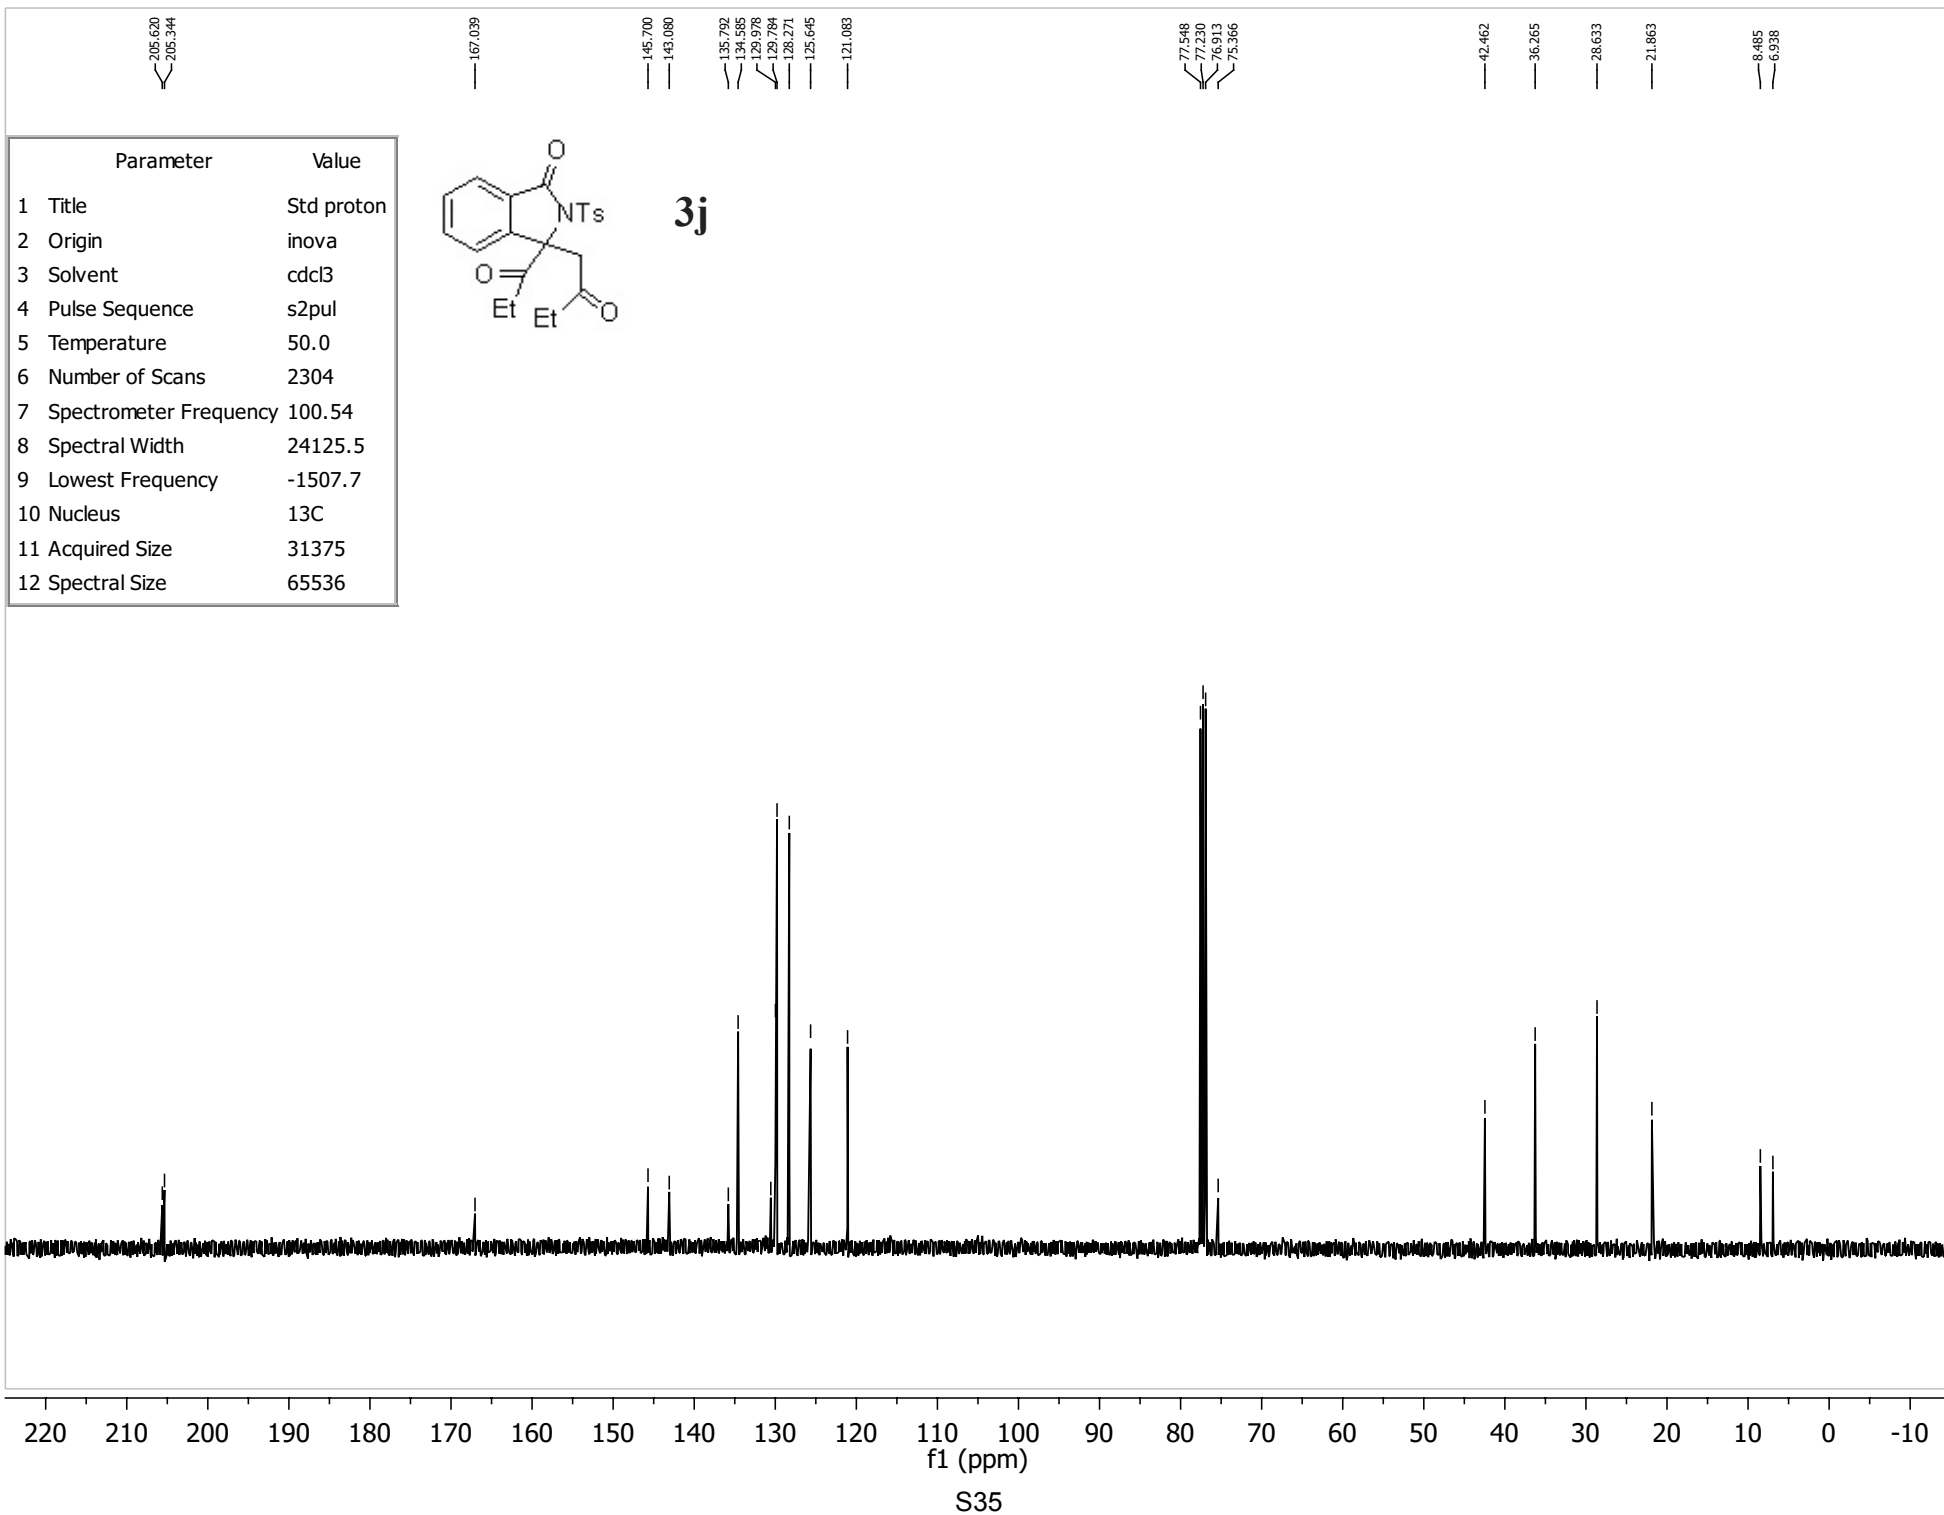

| Parameter                | Value      |
|--------------------------|------------|
| 1 Title                  | Std proton |
| 2 Origin                 | inova      |
| 3 Solvent                | cdcl3      |
| 4 Pulse Sequence         | s2pul      |
| 5 Temperature            | 50.0       |
| 6 Number of Scans        | 8          |
| 7 Spectrometer Frequency | 399.78     |
| 8 Spectral Width         | 6396.4     |
| 9 Lowest Frequency       | -799.5     |
| 10 Nucleus               | 1H         |
| 11 Acquired Size         | 13104      |
| 12 Spectral Size         | 32768      |

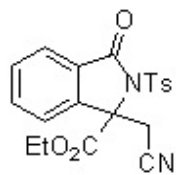

**3k**

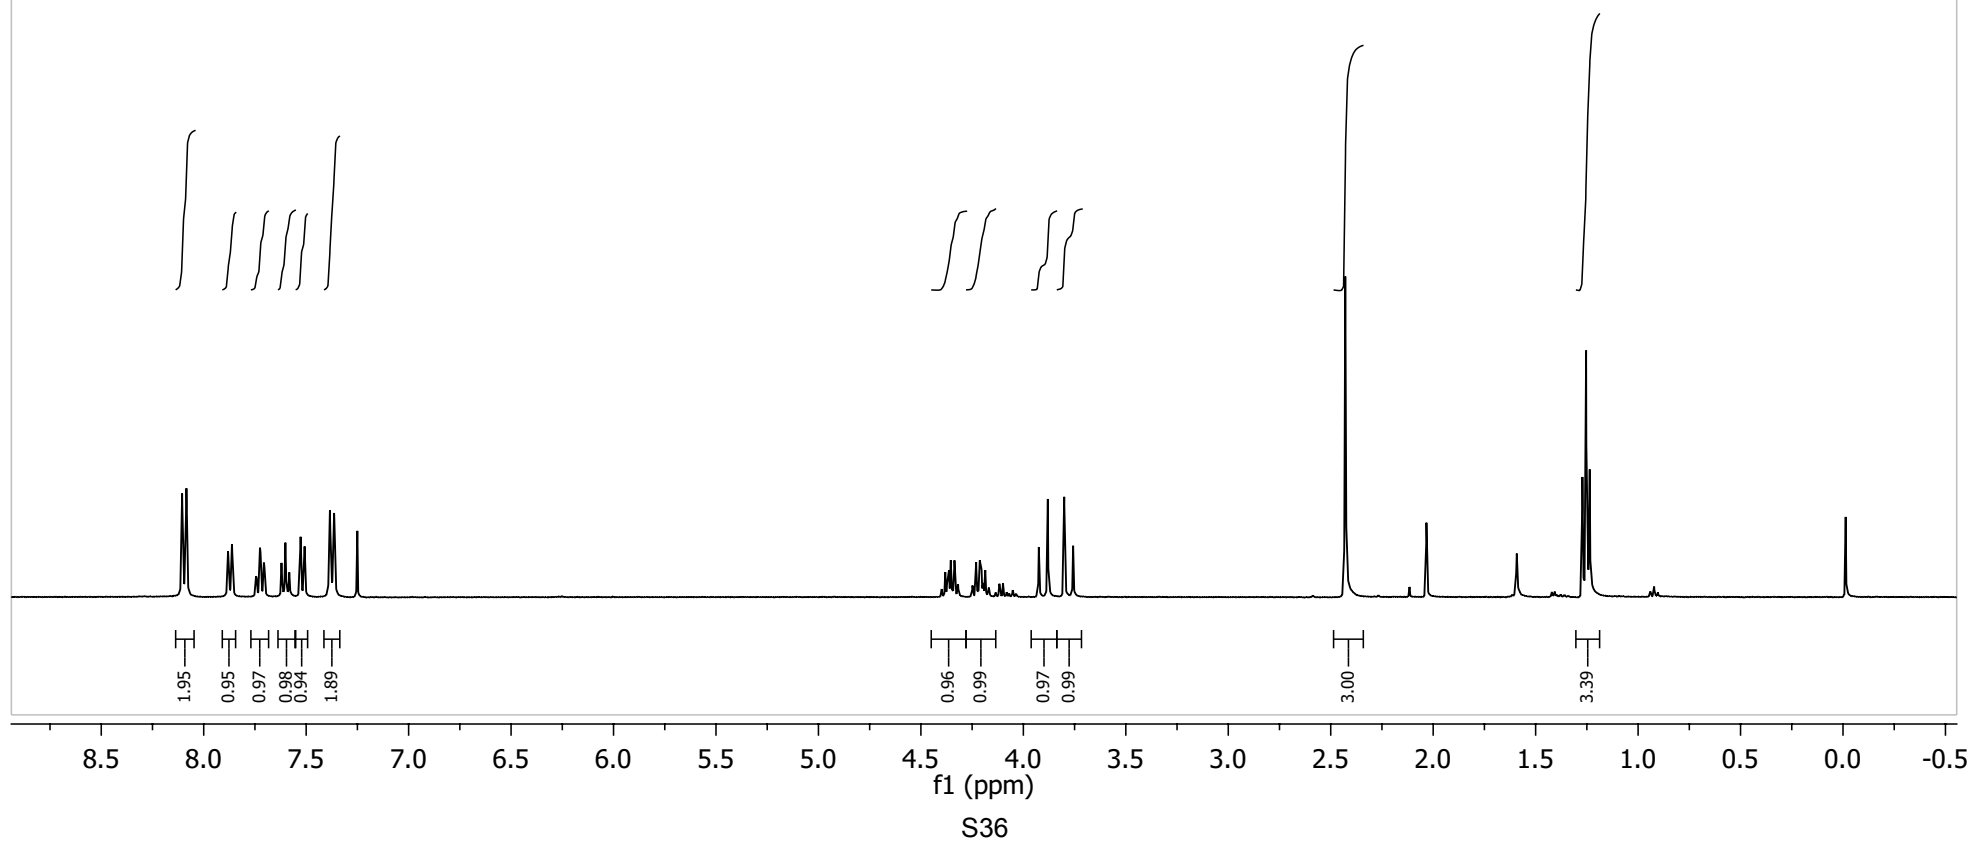

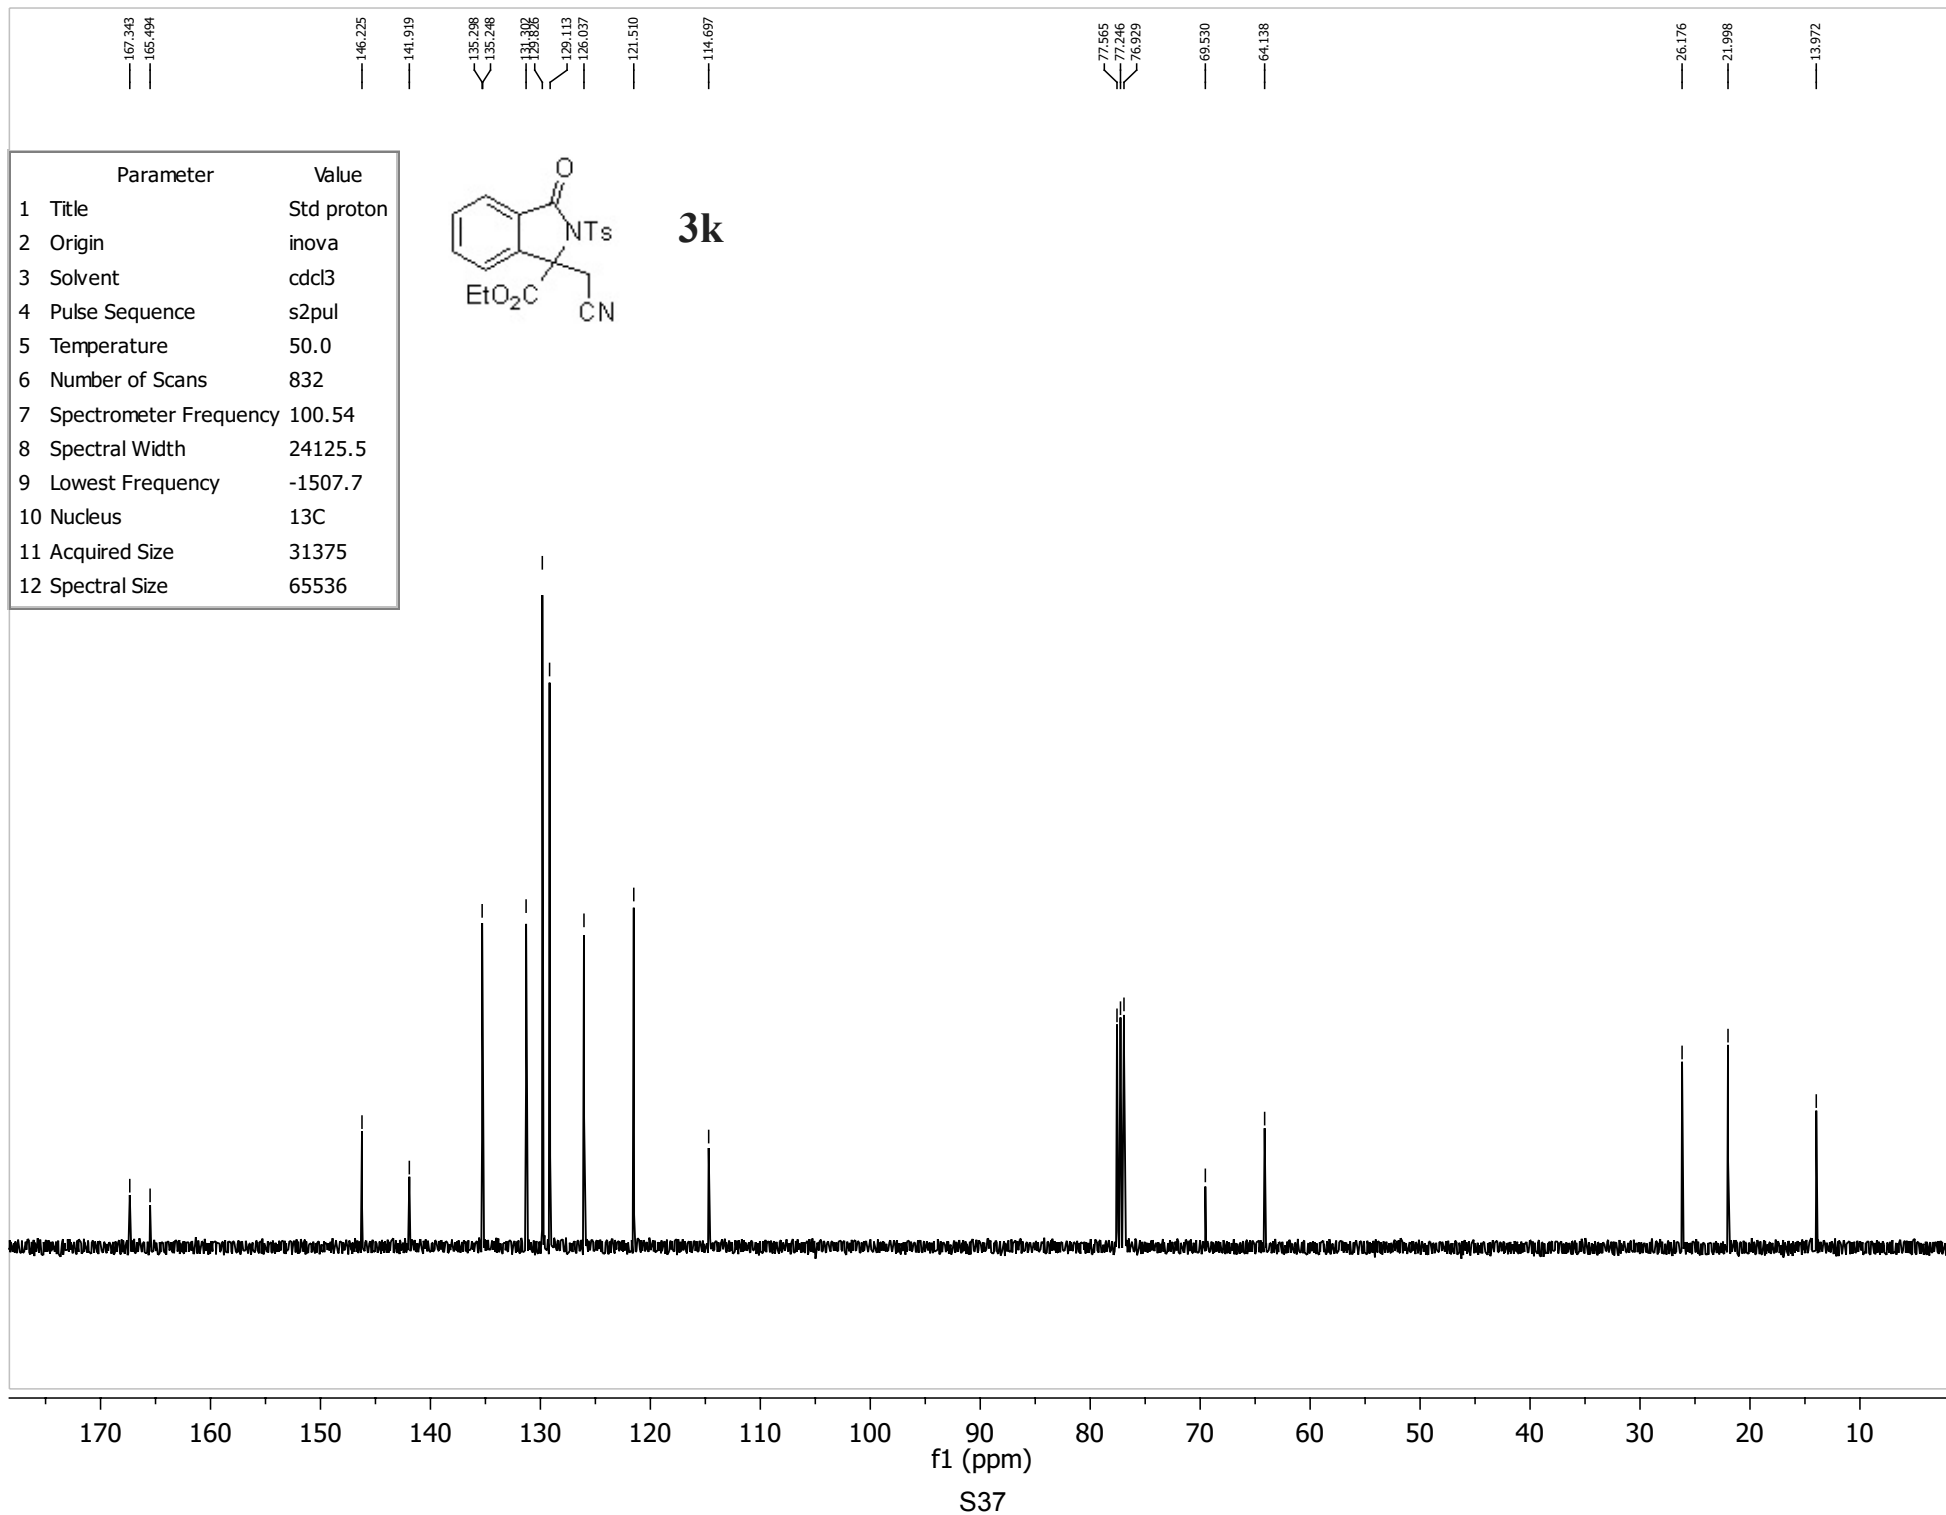

| Parameter                | Value      |
|--------------------------|------------|
| 1 Title                  | Std proton |
| 2 Origin                 | inova      |
| 3 Solvent                | cdcl3      |
| 4 Pulse Sequence         | s2pul      |
| 5 Temperature            | 50.0       |
| 6 Number of Scans        | 8          |
| 7 Spectrometer Frequency | 399.78     |
| 8 Spectral Width         | 6396.4     |
| 9 Lowest Frequency       | -793.1     |
| 10 Nucleus               | 1H         |
| 11 Acquired Size         | 13104      |
| 12 Spectral Size         | 32768      |

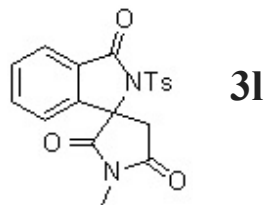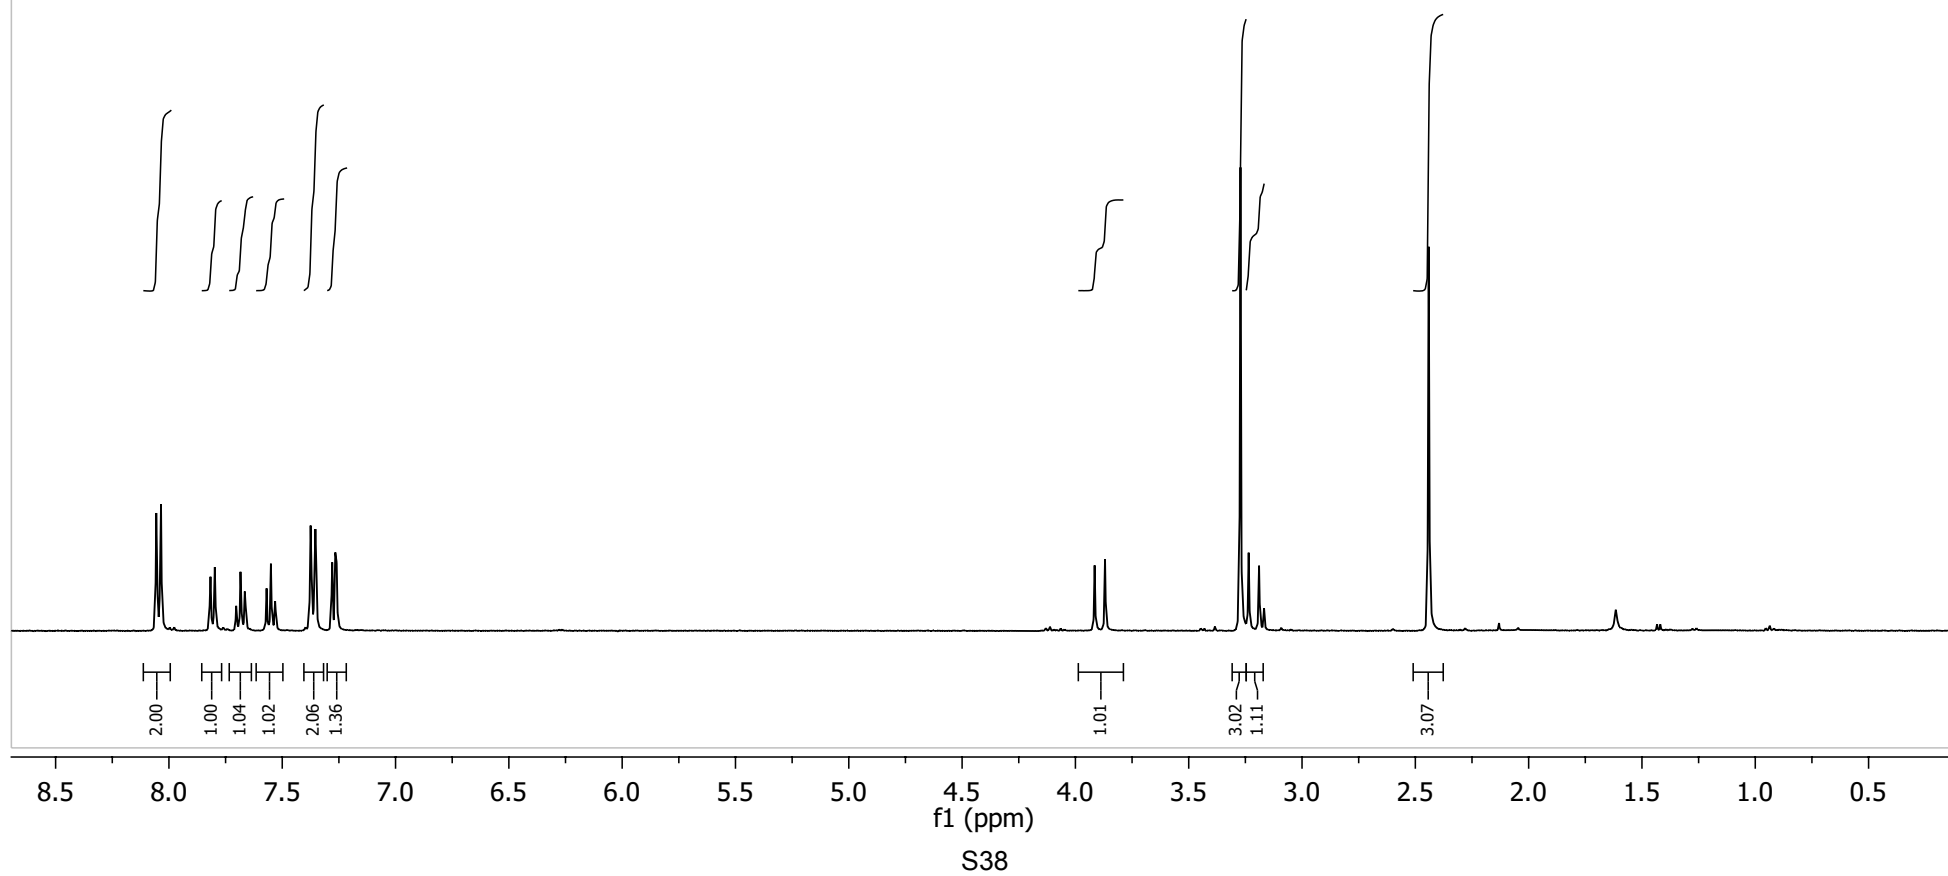

173.410  
172.925  
165.377  
146.295  
144.591  
135.416  
134.781  
129.659  
129.649  
128.581  
125.763  
120.499  
77.564  
77.247  
76.929  
69.321  
41.623  
26.313  
22.012

| Parameter                | Value      |
|--------------------------|------------|
| 1 Title                  | Std proton |
| 2 Origin                 | inova      |
| 3 Solvent                | cdcl3      |
| 4 Pulse Sequence         | s2pul      |
| 5 Temperature            | 50.0       |
| 6 Number of Scans        | 1264       |
| 7 Spectrometer Frequency | 100.54     |
| 8 Spectral Width         | 24125.5    |
| 9 Lowest Frequency       | -1507.7    |
| 10 Nucleus               | 13C        |
| 11 Acquired Size         | 31375      |
| 12 Spectral Size         | 65536      |

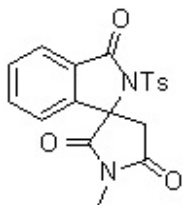

**31**

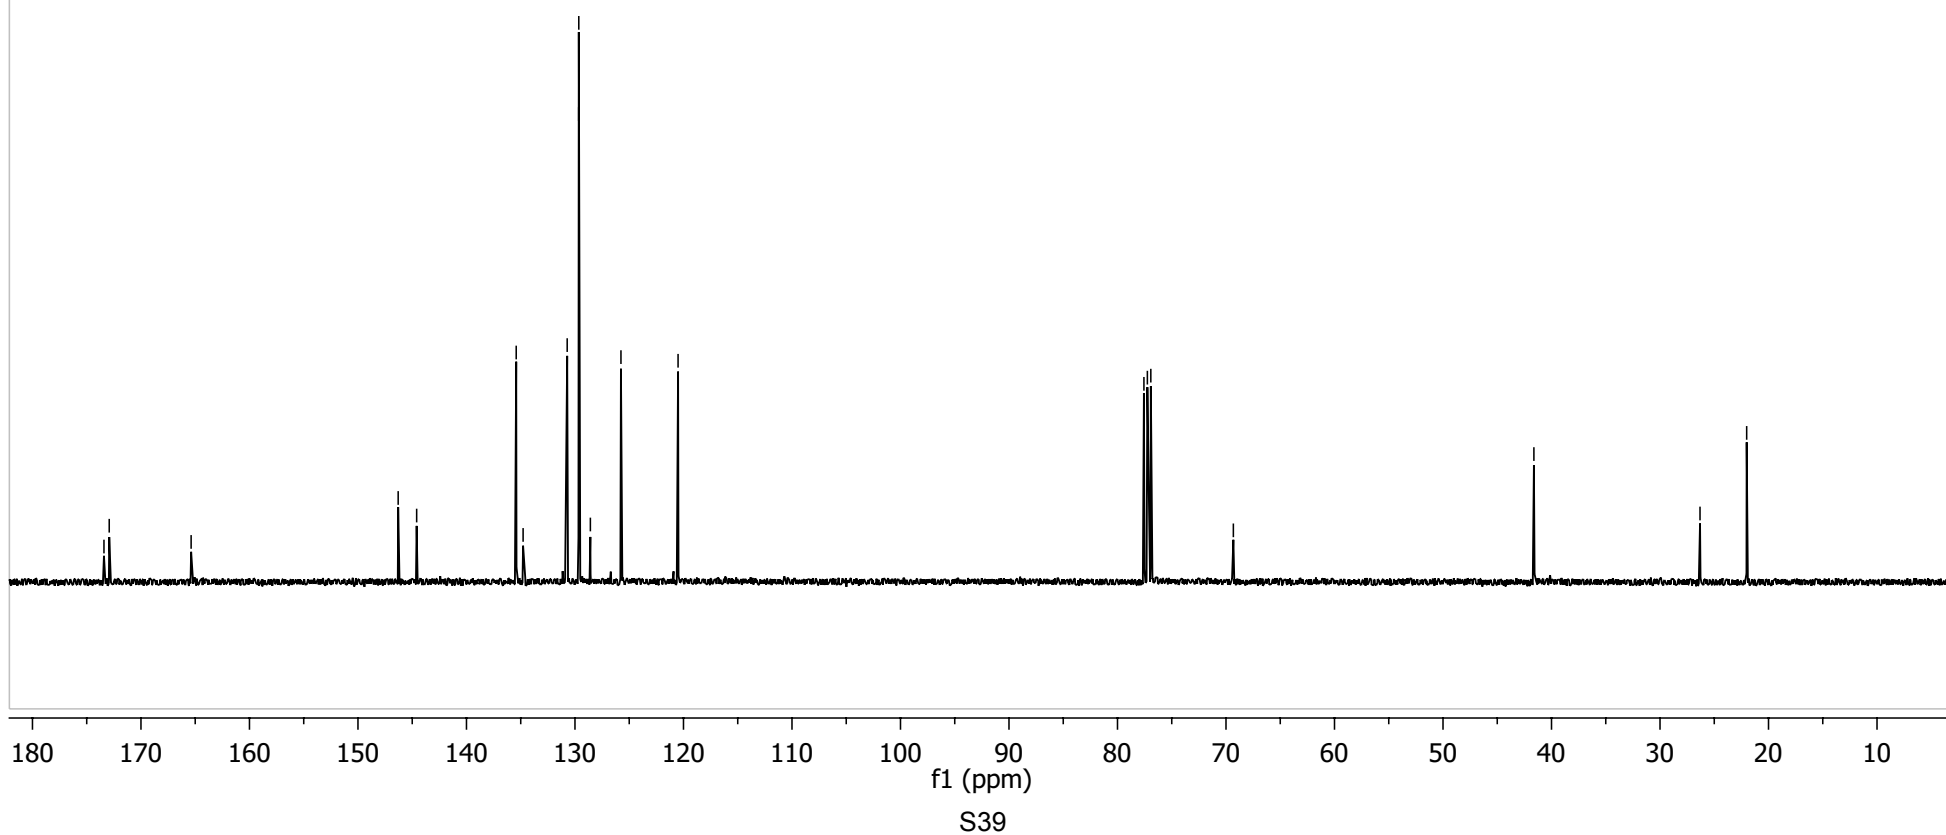



| Parameter                | Value      |
|--------------------------|------------|
| 1 Title                  | Std proton |
| 2 Origin                 | inova      |
| 3 Solvent                | cdcl3      |
| 4 Pulse Sequence         | s2pul      |
| 5 Temperature            | 30.0       |
| 6 Number of Scans        | 8          |
| 7 Spectrometer Frequency | 399.78     |
| 8 Spectral Width         | 6396.4     |
| 9 Lowest Frequency       | -799.5     |
| 10 Nucleus               | 1H         |
| 11 Acquired Size         | 13104      |
| 12 Spectral Size         | 32768      |

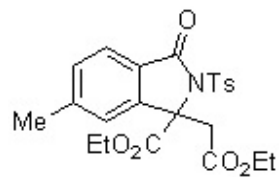

**3n**

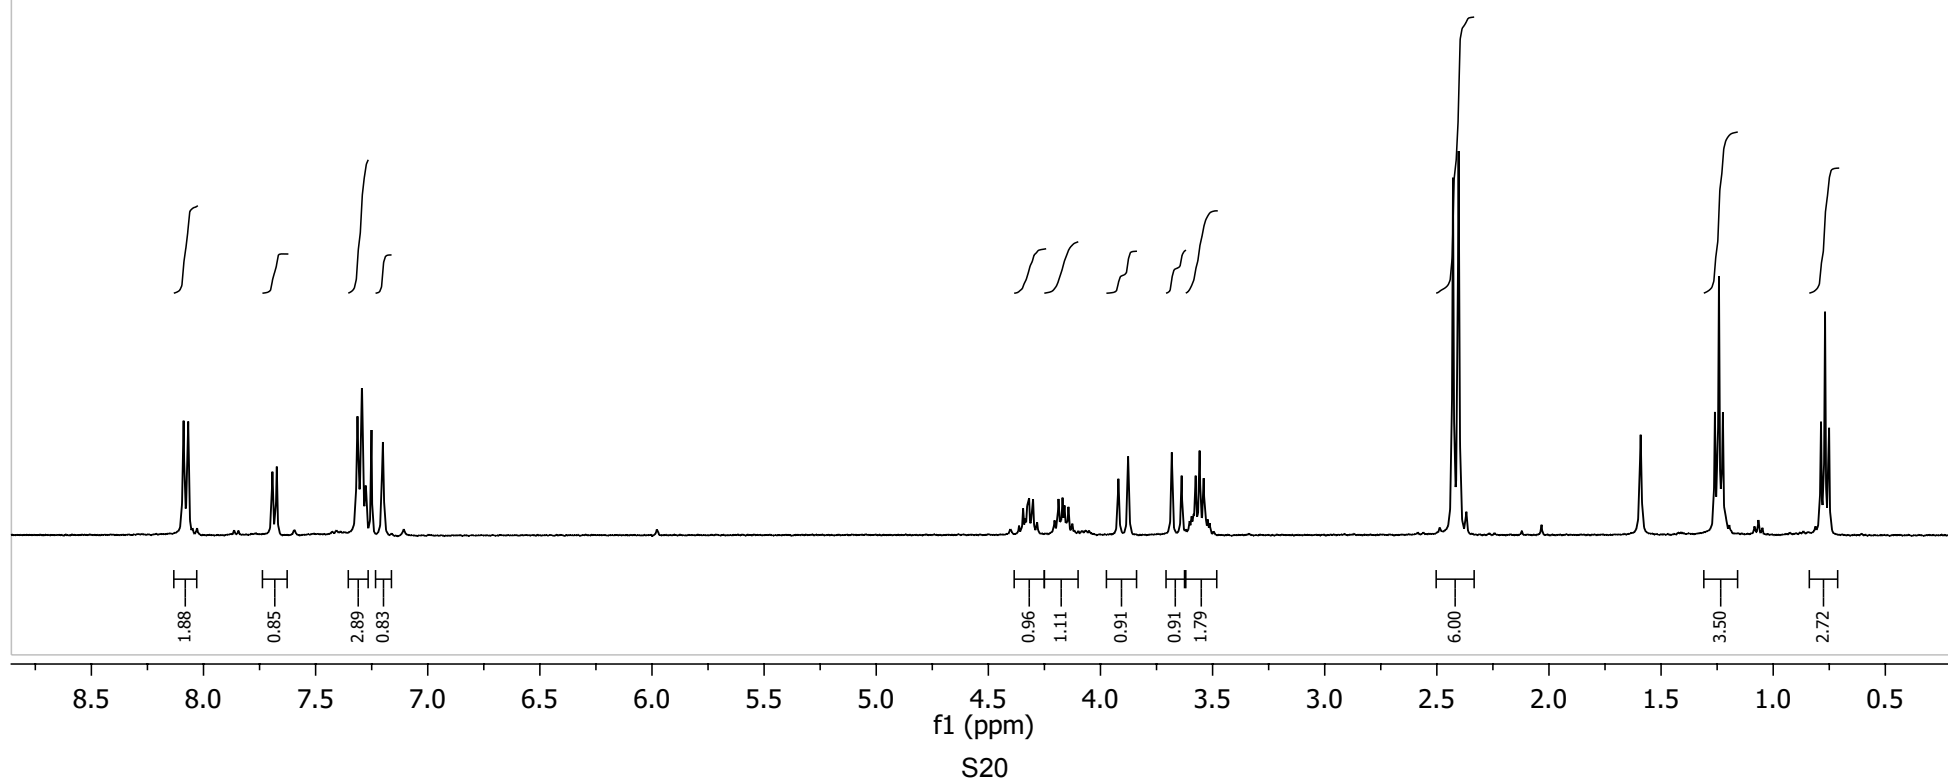

168.790  
167.960  
166.632

145.732  
145.255  
144.011

136.175

131.187

129.151

127.360

124.956

121.633

77.557  
77.239  
76.921

70.231

63.429

60.747

38.535

22.421  
21.885

14.024  
13.676

| Parameter                | Value      |
|--------------------------|------------|
| 1 Title                  | Std proton |
| 2 Origin                 | inova      |
| 3 Solvent                | cdcl3      |
| 4 Pulse Sequence         | s2pul      |
| 5 Temperature            | 3.0        |
| 6 Number of Scans        | 840        |
| 7 Spectrometer Frequency | 100.54     |
| 8 Spectral Width         | 24125.5    |
| 9 Lowest Frequency       | -1507.7    |
| 10 Nucleus               | 13C        |
| 11 Acquired Size         | 31375      |
| 12 Spectral Size         | 65536      |

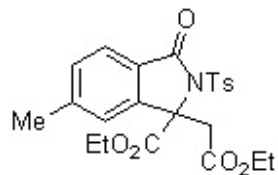

3n

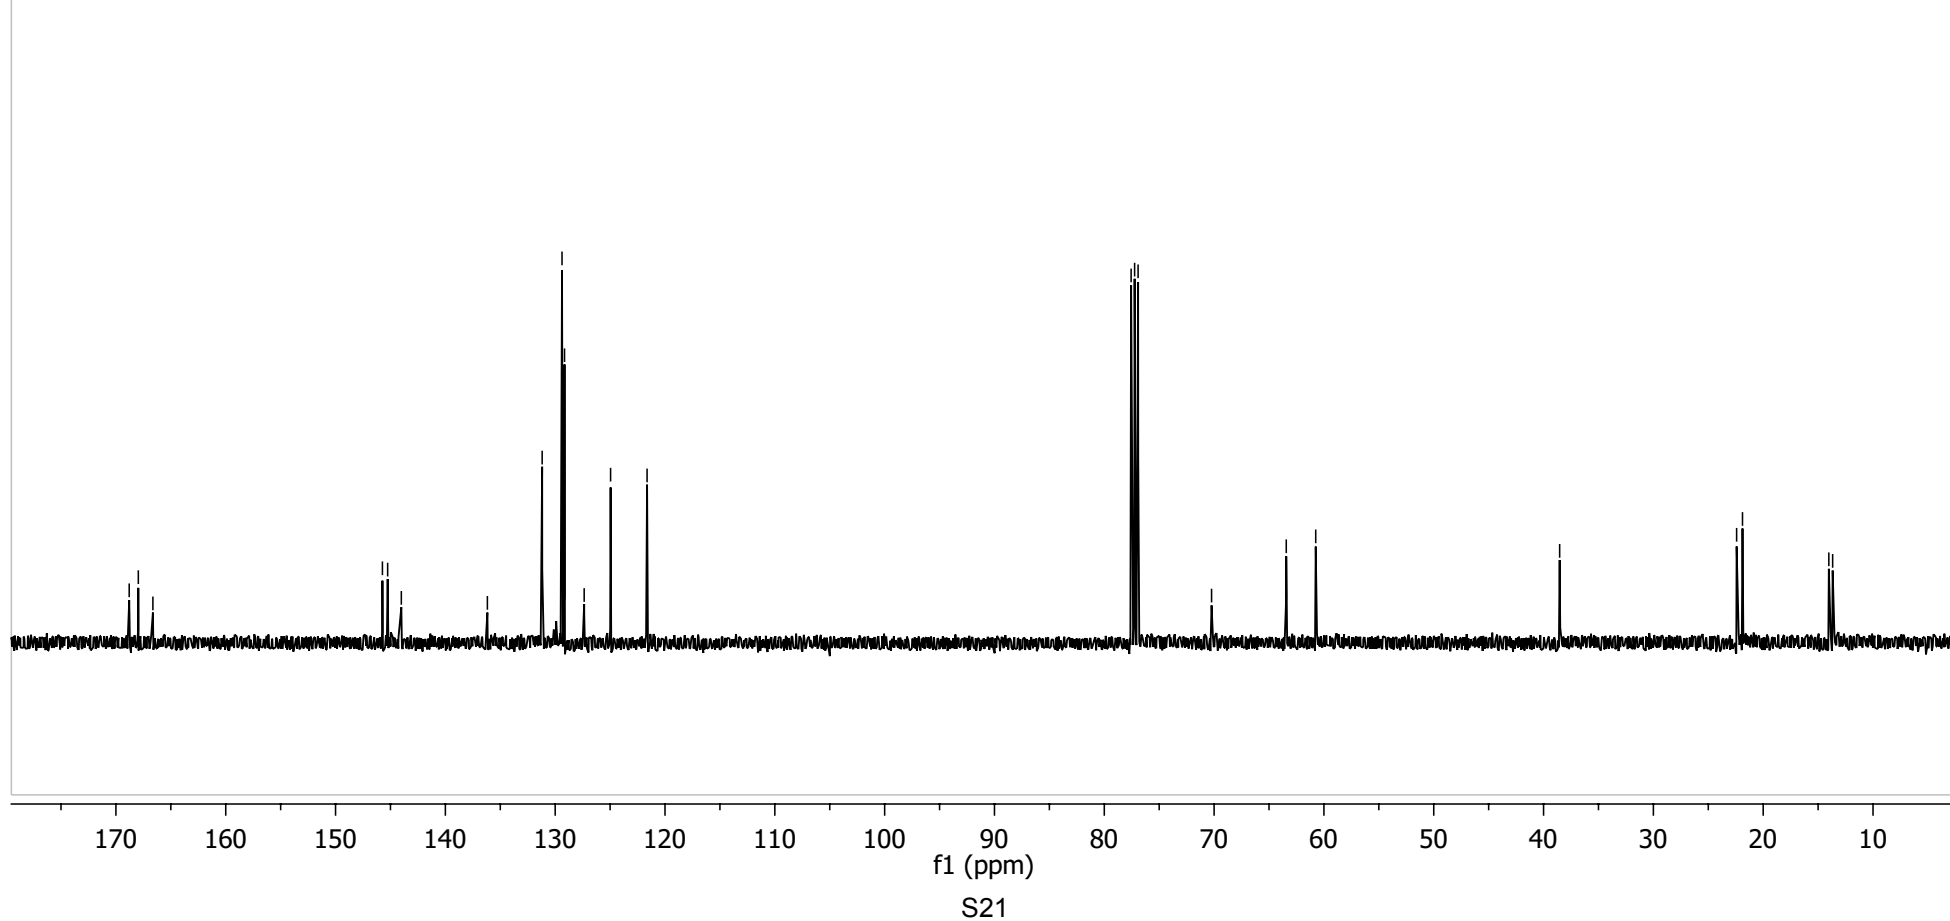

| Parameter                | Value      |
|--------------------------|------------|
| 1 Title                  | Std proton |
| 2 Origin                 | inova      |
| 3 Solvent                | cdcl3      |
| 4 Pulse Sequence         | s2pul      |
| 5 Temperature            | 22.0       |
| 6 Number of Scans        | 8          |
| 7 Spectrometer Frequency | 399.78     |
| 8 Spectral Width         | 6396.4     |
| 9 Lowest Frequency       | -799.5     |
| 10 Nucleus               | 1H         |
| 11 Acquired Size         | 13104      |
| 12 Spectral Size         | 32768      |

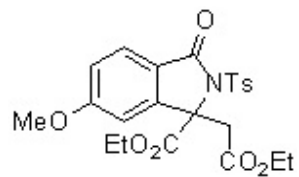

**30**

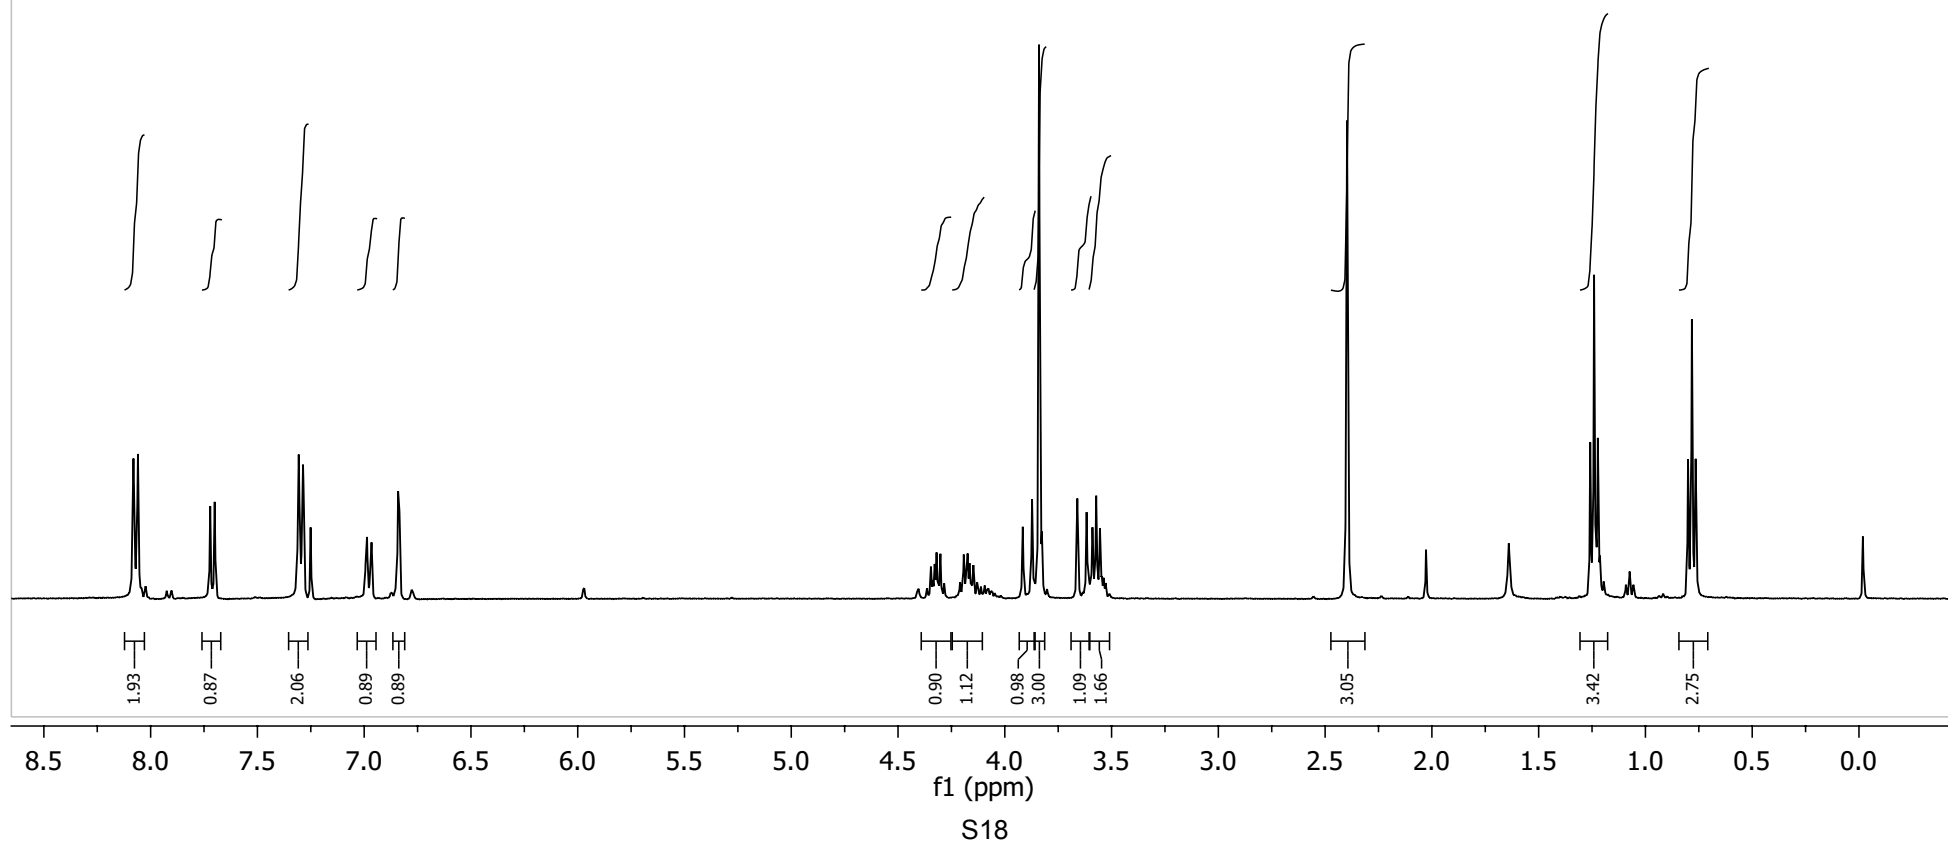

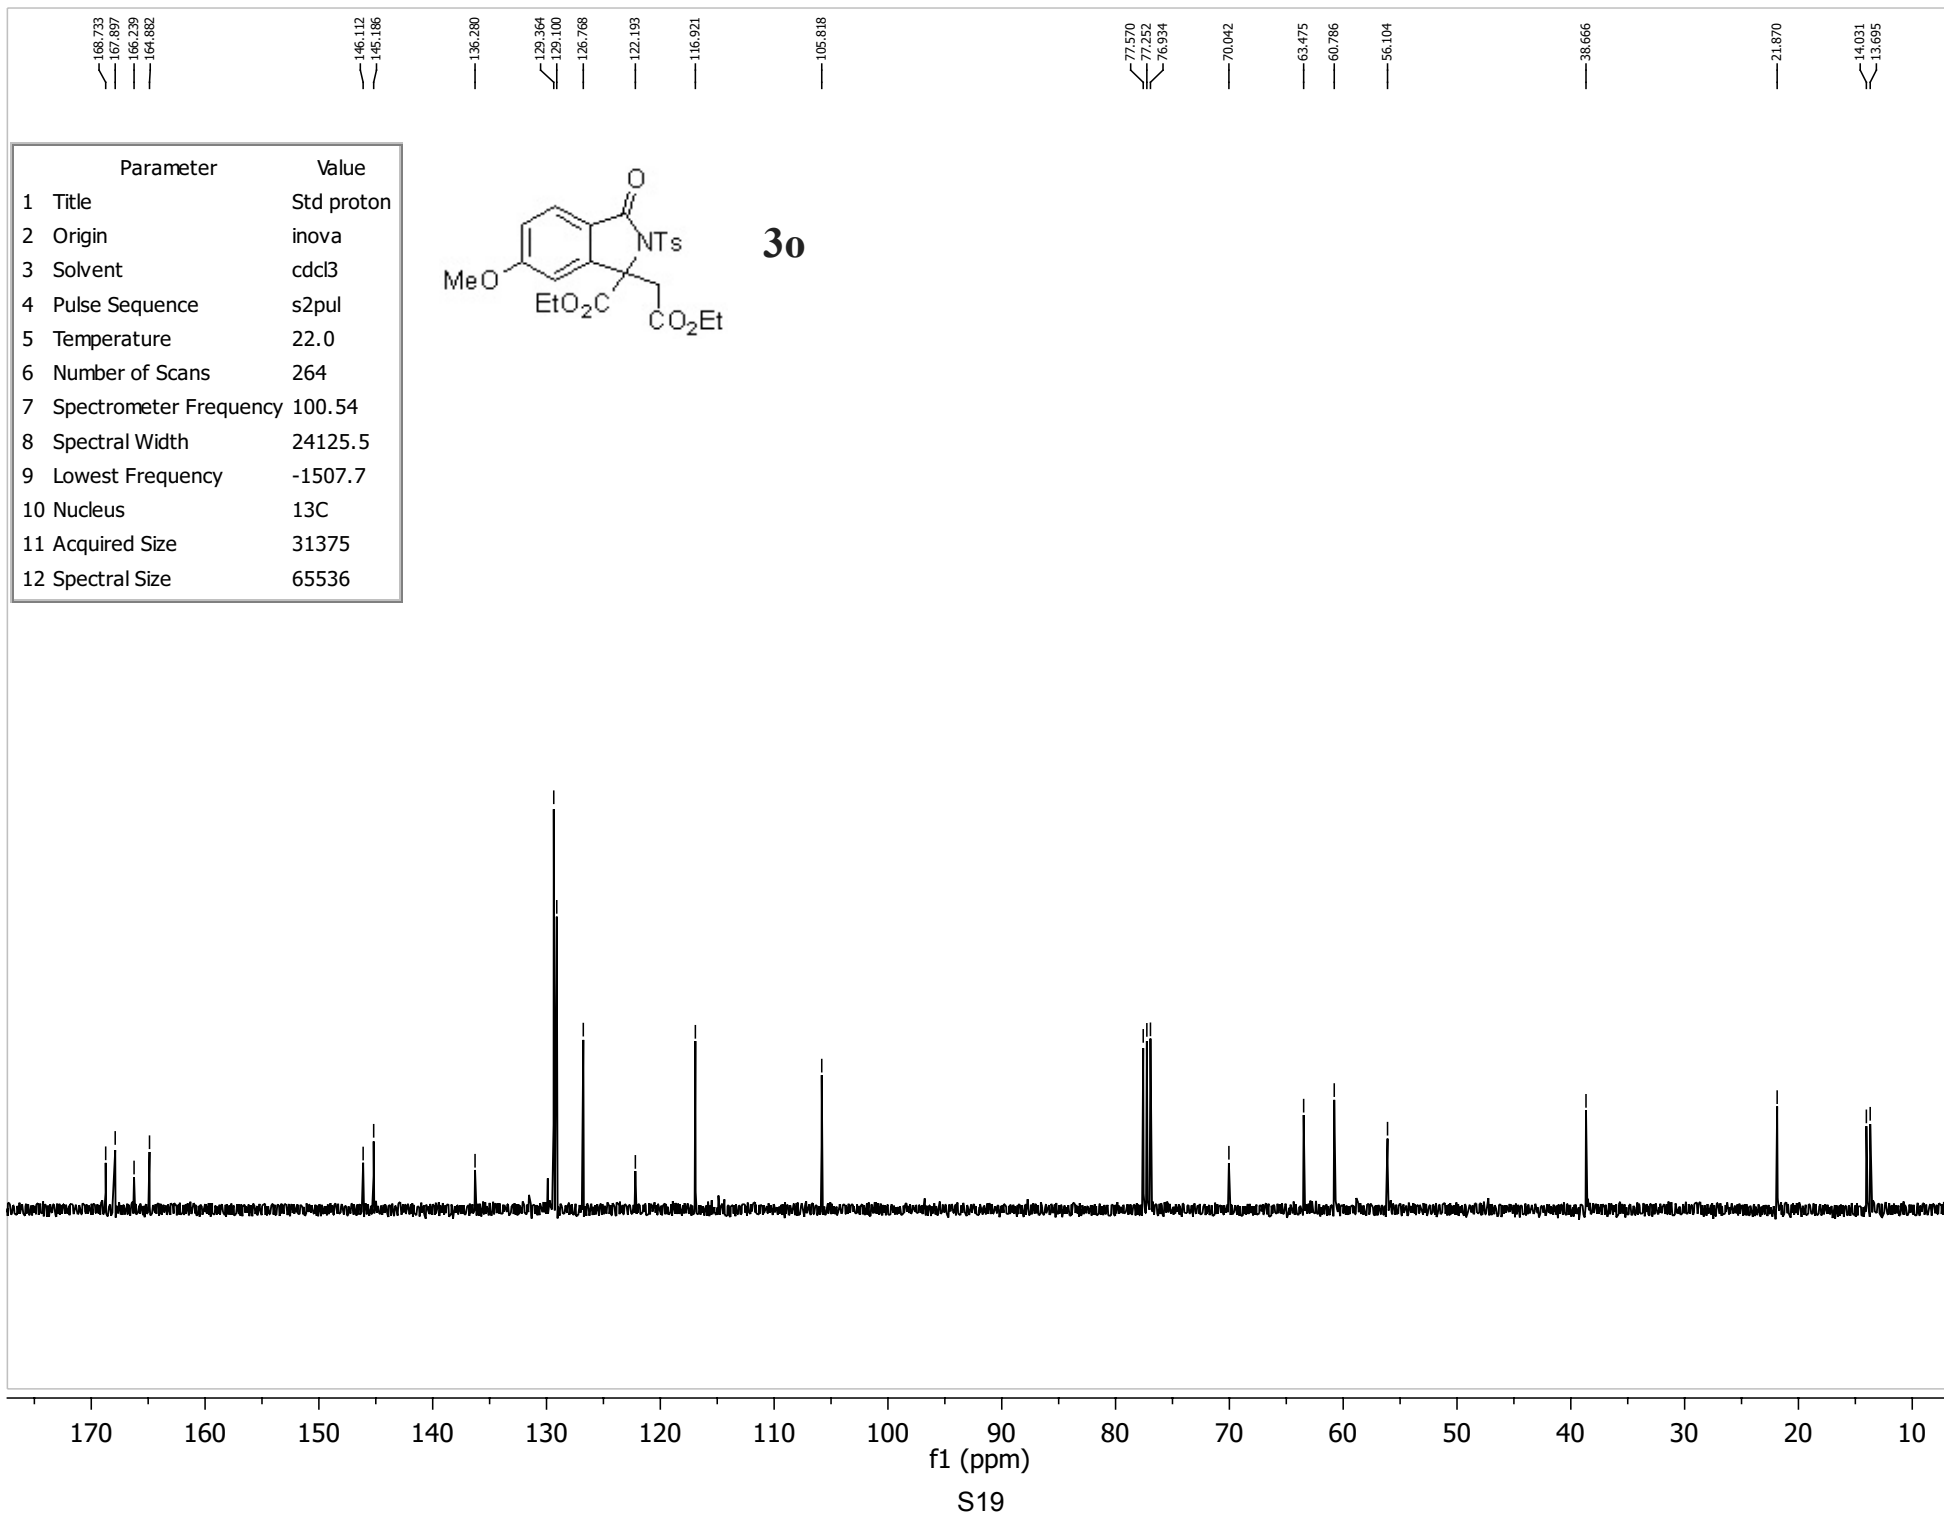

| Parameter                | Value      |
|--------------------------|------------|
| 1 Title                  | Std proton |
| 2 Origin                 | inova      |
| 3 Solvent                | cdcl3      |
| 4 Pulse Sequence         | s2pul      |
| 5 Temperature            | 22.0       |
| 6 Number of Scans        | 8          |
| 7 Spectrometer Frequency | 399.78     |
| 8 Spectral Width         | 6396.4     |
| 9 Lowest Frequency       | -799.5     |
| 10 Nucleus               | 1H         |
| 11 Acquired Size         | 13104      |
| 12 Spectral Size         | 32768      |

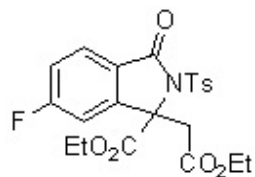

**3p**

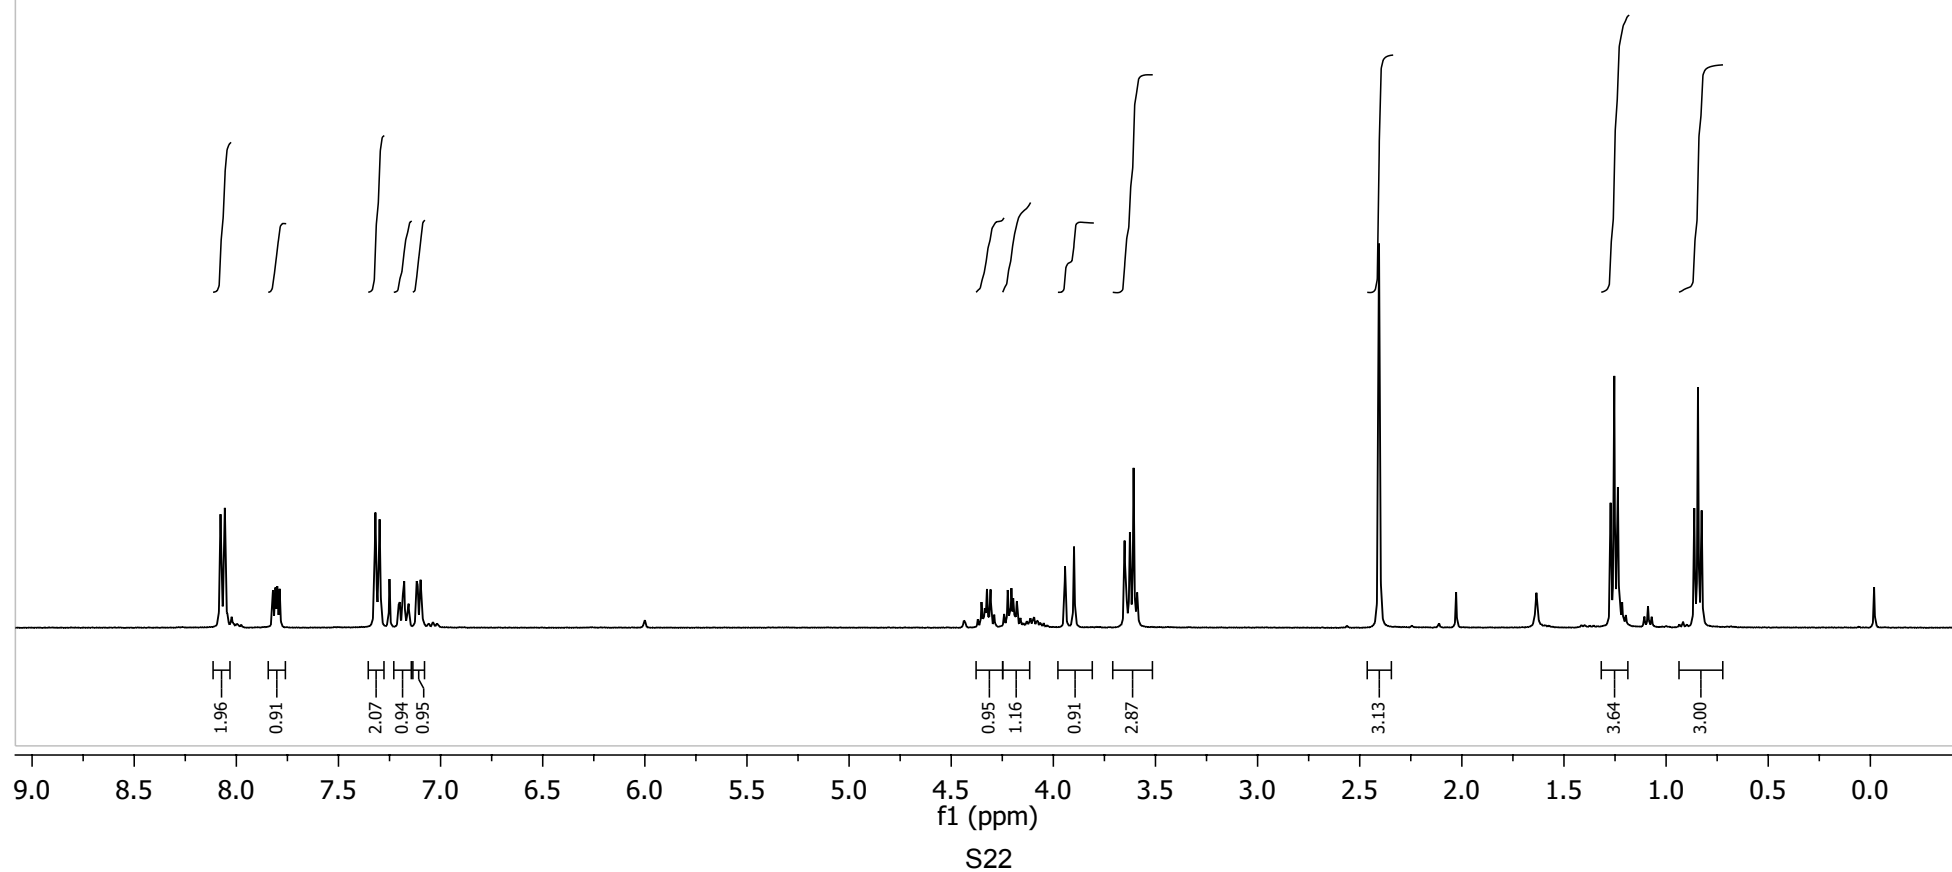

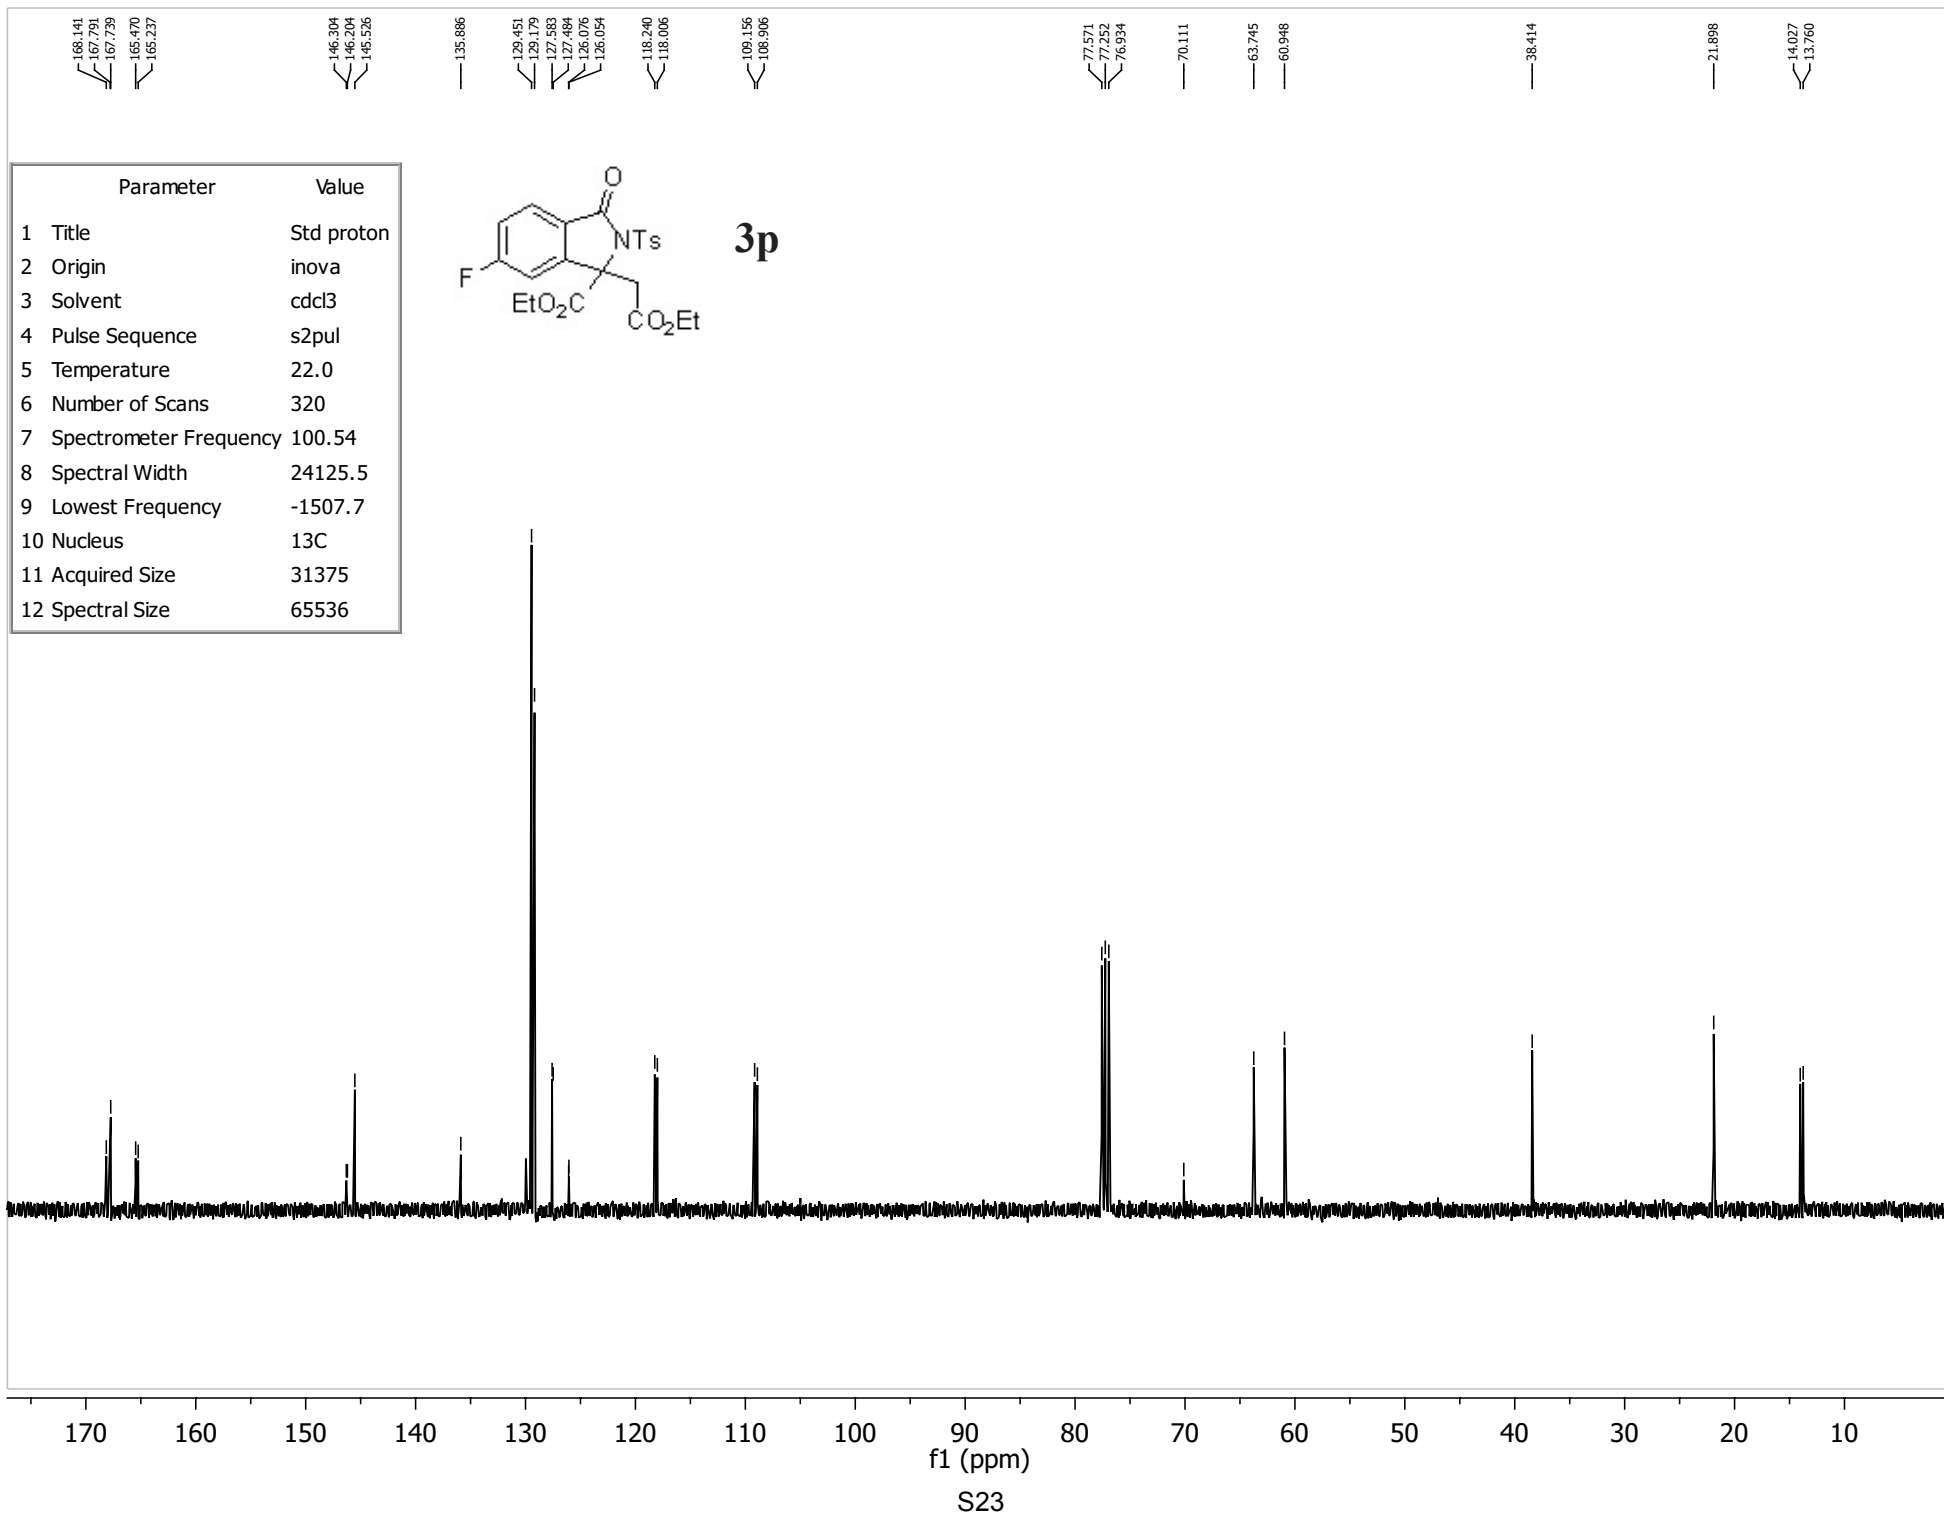

| Parameter                | Value      |
|--------------------------|------------|
| 1 Title                  | Std proton |
| 2 Origin                 | inova      |
| 3 Solvent                | cdcl3      |
| 4 Pulse Sequence         | s2pul      |
| 5 Temperature            | 30.0       |
| 6 Number of Scans        | 8          |
| 7 Spectrometer Frequency | 399.78     |
| 8 Spectral Width         | 6396.4     |
| 9 Lowest Frequency       | -799.5     |
| 10 Nucleus               | 1H         |
| 11 Acquired Size         | 13104      |
| 12 Spectral Size         | 32768      |

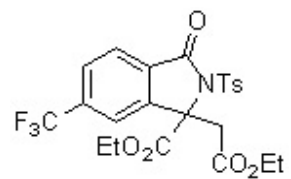

3q

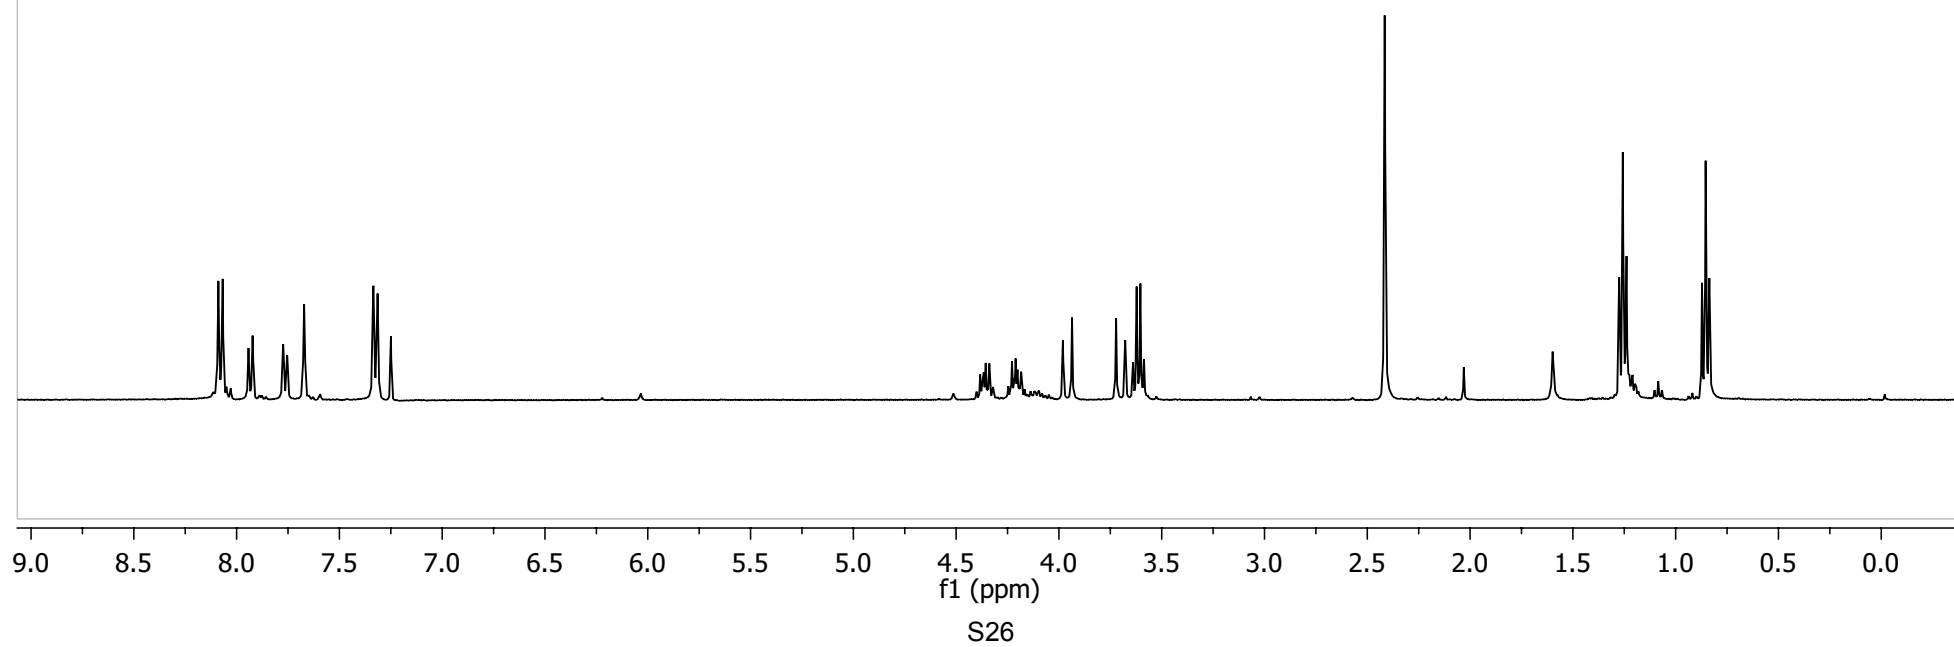

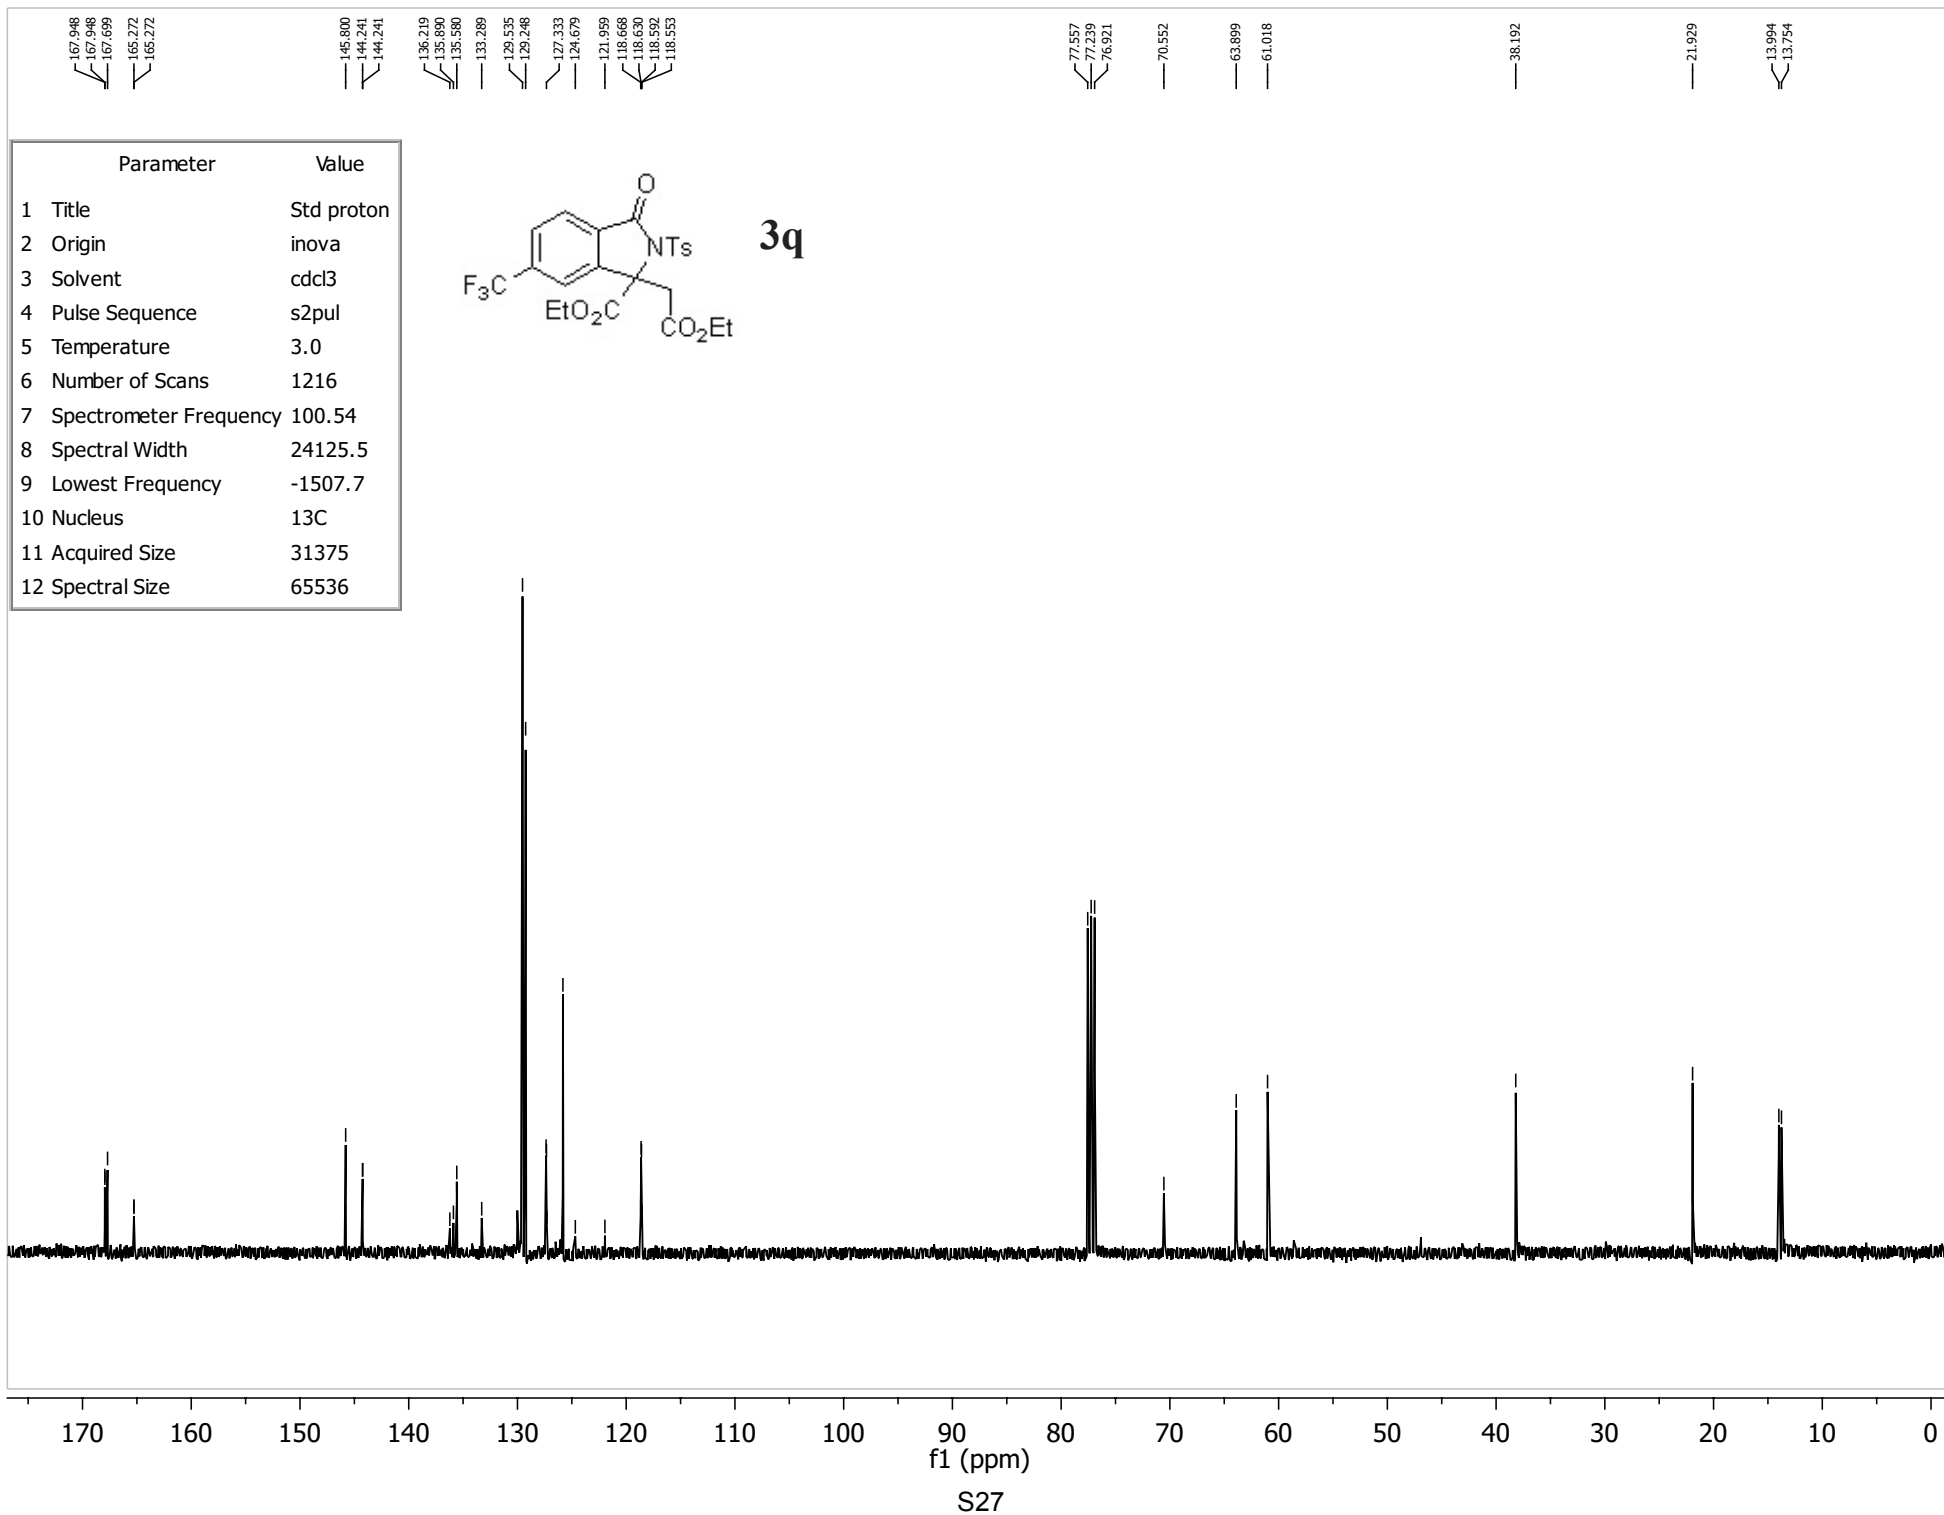



| Parameter                | Value      |
|--------------------------|------------|
| 1 Title                  | Std proton |
| 2 Origin                 | inova      |
| 3 Solvent                | cdcl3      |
| 4 Pulse Sequence         | s2pul      |
| 5 Temperature            | 30.0       |
| 6 Number of Scans        | 8          |
| 7 Spectrometer Frequency | 399.78     |
| 8 Spectral Width         | 6396.4     |
| 9 Lowest Frequency       | -799.5     |
| 10 Nucleus               | 1H         |
| 11 Acquired Size         | 13104      |
| 12 Spectral Size         | 32768      |

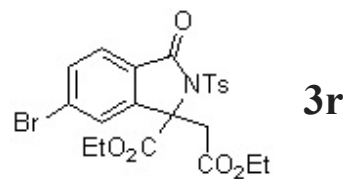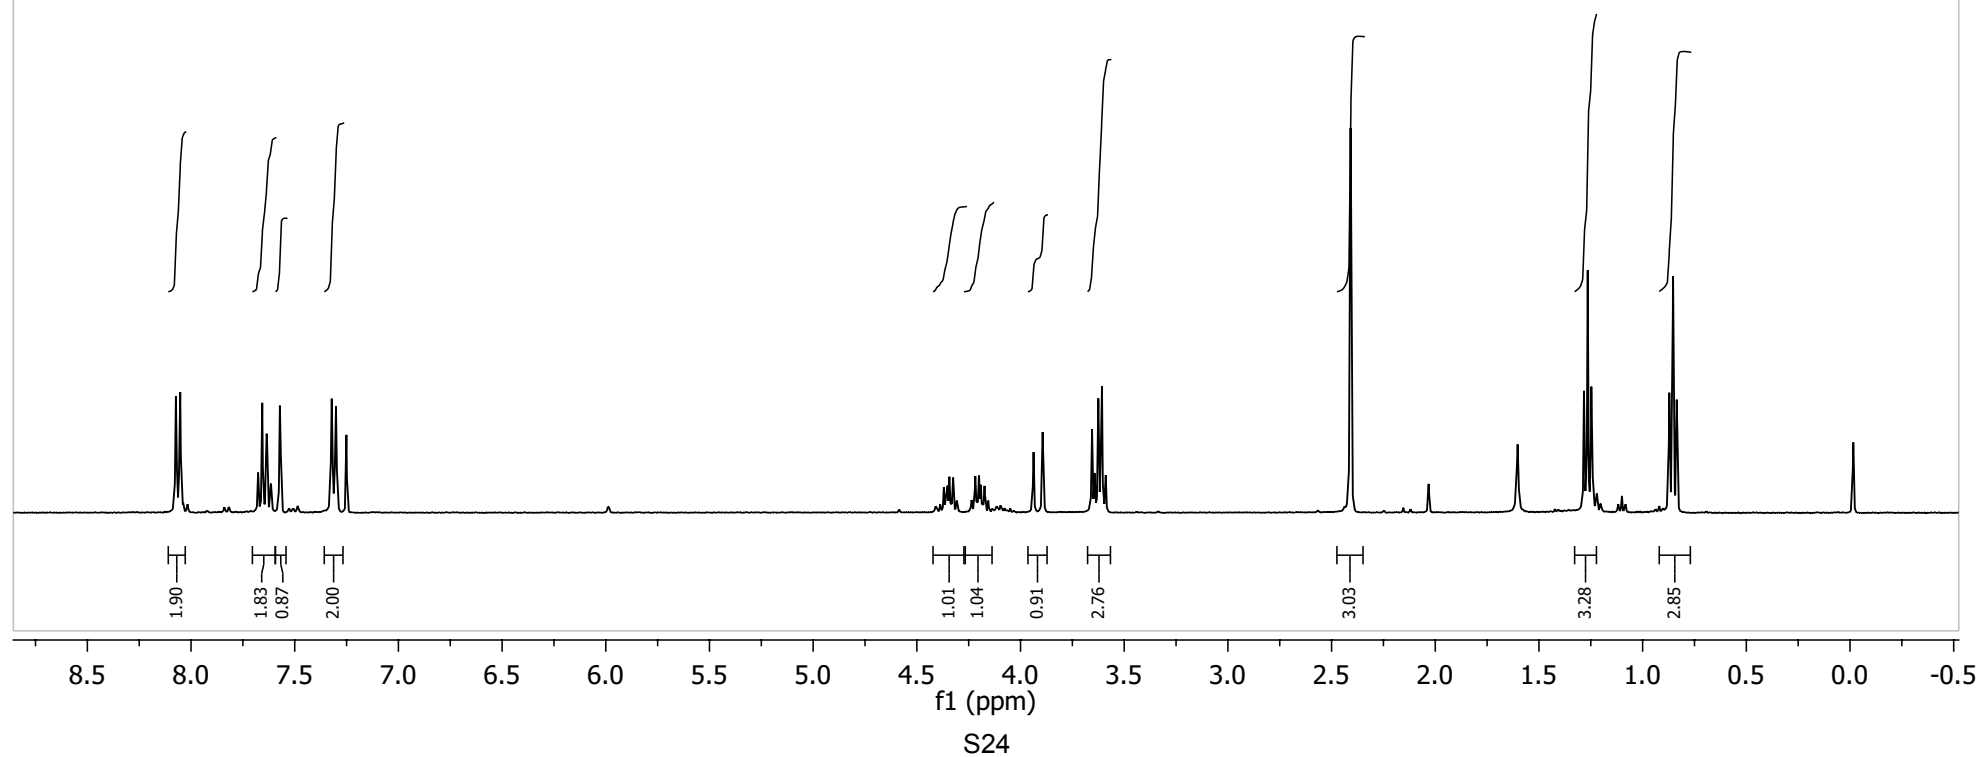

168.134  
167.731  
165.717

145.593  
145.288

135.805  
133.650  
129.203  
128.979  
126.439  
124.718

77.563  
77.246  
76.928

69.996

63.796  
60.968

38.280

21.916

14.041  
13.777

| Parameter                | Value      |
|--------------------------|------------|
| 1 Title                  | Std proton |
| 2 Origin                 | inova      |
| 3 Solvent                | cdcl3      |
| 4 Pulse Sequence         | s2pul      |
| 5 Temperature            | 3.0        |
| 6 Number of Scans        | 888        |
| 7 Spectrometer Frequency | 100.54     |
| 8 Spectral Width         | 24125.5    |
| 9 Lowest Frequency       | -1507.7    |
| 10 Nucleus               | 13C        |
| 11 Acquired Size         | 31375      |
| 12 Spectral Size         | 65536      |

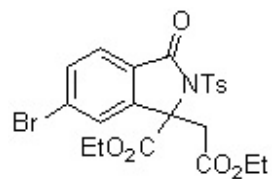

**3r**

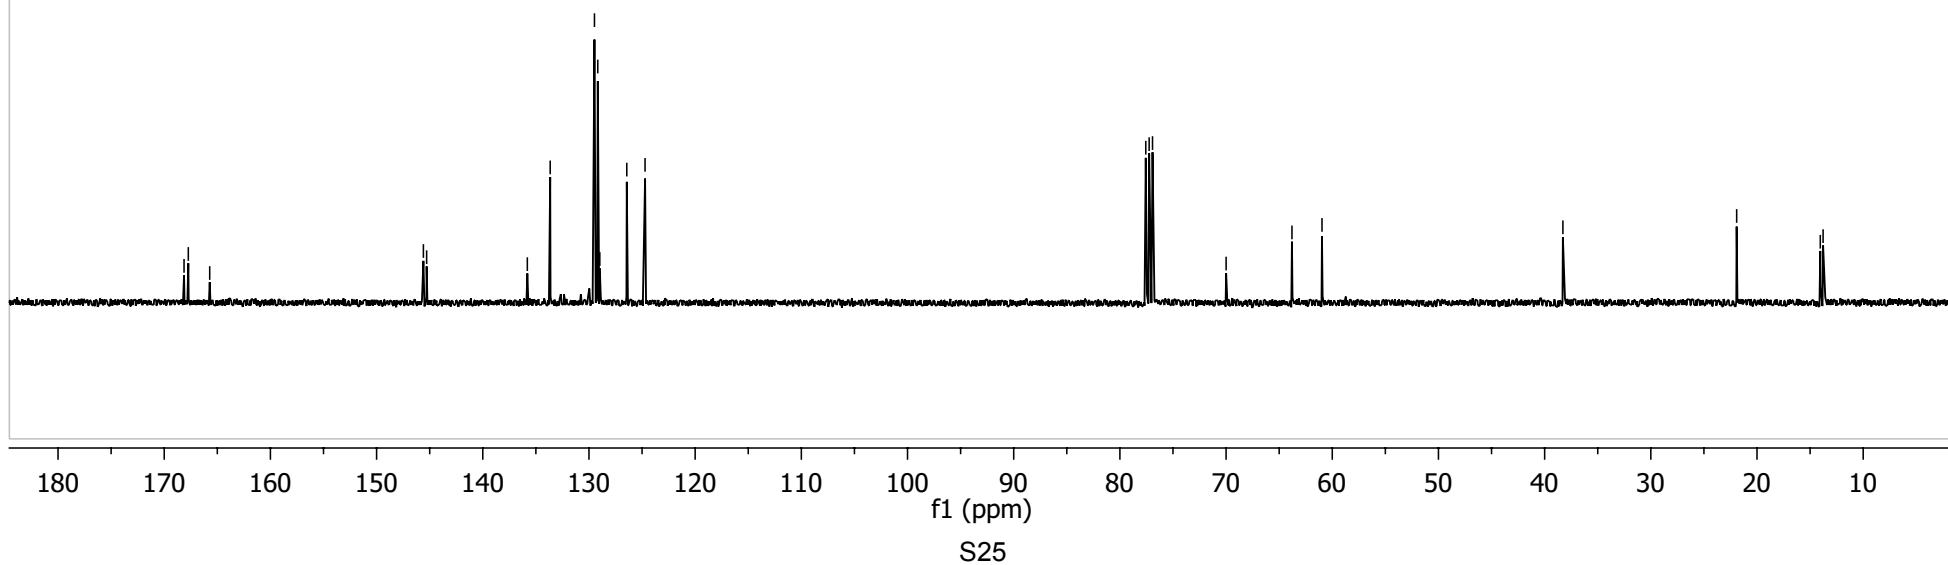

| Parameter                | Value      |
|--------------------------|------------|
| 1 Title                  | Std proton |
| 2 Origin                 | inova      |
| 3 Solvent                | cdcl3      |
| 4 Pulse Sequence         | s2pul      |
| 5 Temperature            | 30.0       |
| 6 Number of Scans        | 8          |
| 7 Spectrometer Frequency | 399.78     |
| 8 Spectral Width         | 6396.4     |
| 9 Lowest Frequency       | -799.5     |
| 10 Nucleus               | 1H         |
| 11 Acquired Size         | 13104      |
| 12 Spectral Size         | 32768      |

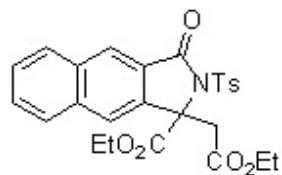

**3s**

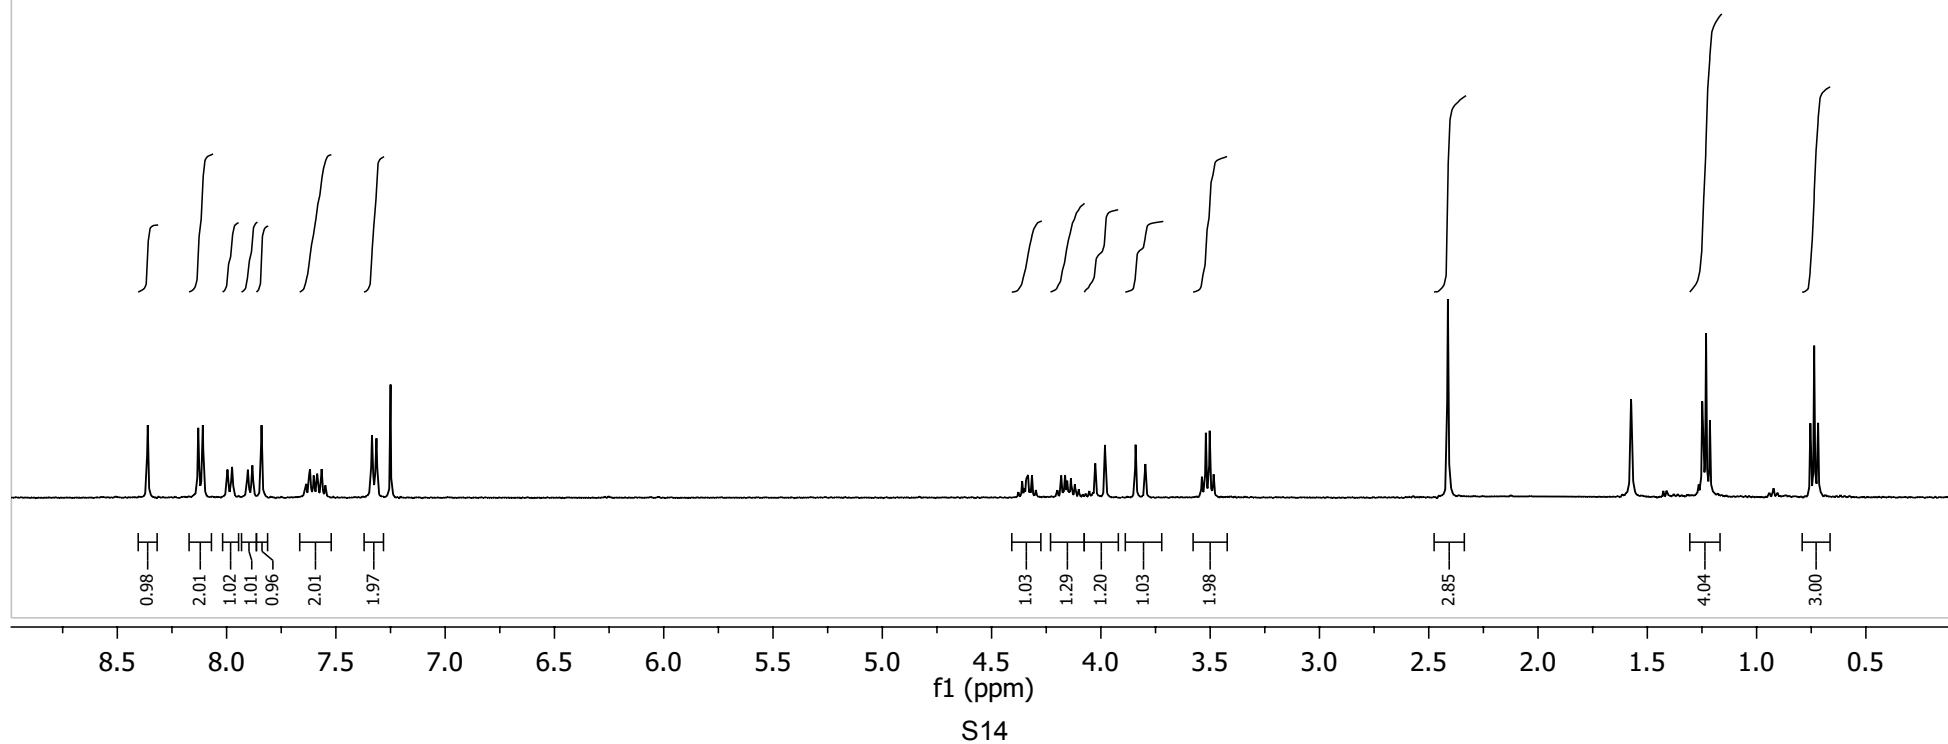

169.092  
168.083  
166.583

145.393

138.312

136.091

133.564

129.457

129.137

128.678

127.619

127.358

126.282

120.533

77.549

77.332

76.914

70.205

63.461

60.769

39.099

21.900

14.021

13.653

| Parameter                | Value      |
|--------------------------|------------|
| 1 Title                  | Std proton |
| 2 Origin                 | inova      |
| 3 Solvent                | cdcl3      |
| 4 Pulse Sequence         | s2pul      |
| 5 Temperature            | 3.0        |
| 6 Number of Scans        | 1440       |
| 7 Spectrometer Frequency | 100.54     |
| 8 Spectral Width         | 24125.5    |
| 9 Lowest Frequency       | -1507.7    |
| 10 Nucleus               | 13C        |
| 11 Acquired Size         | 31375      |
| 12 Spectral Size         | 65536      |

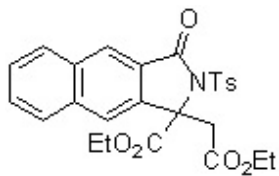

3s

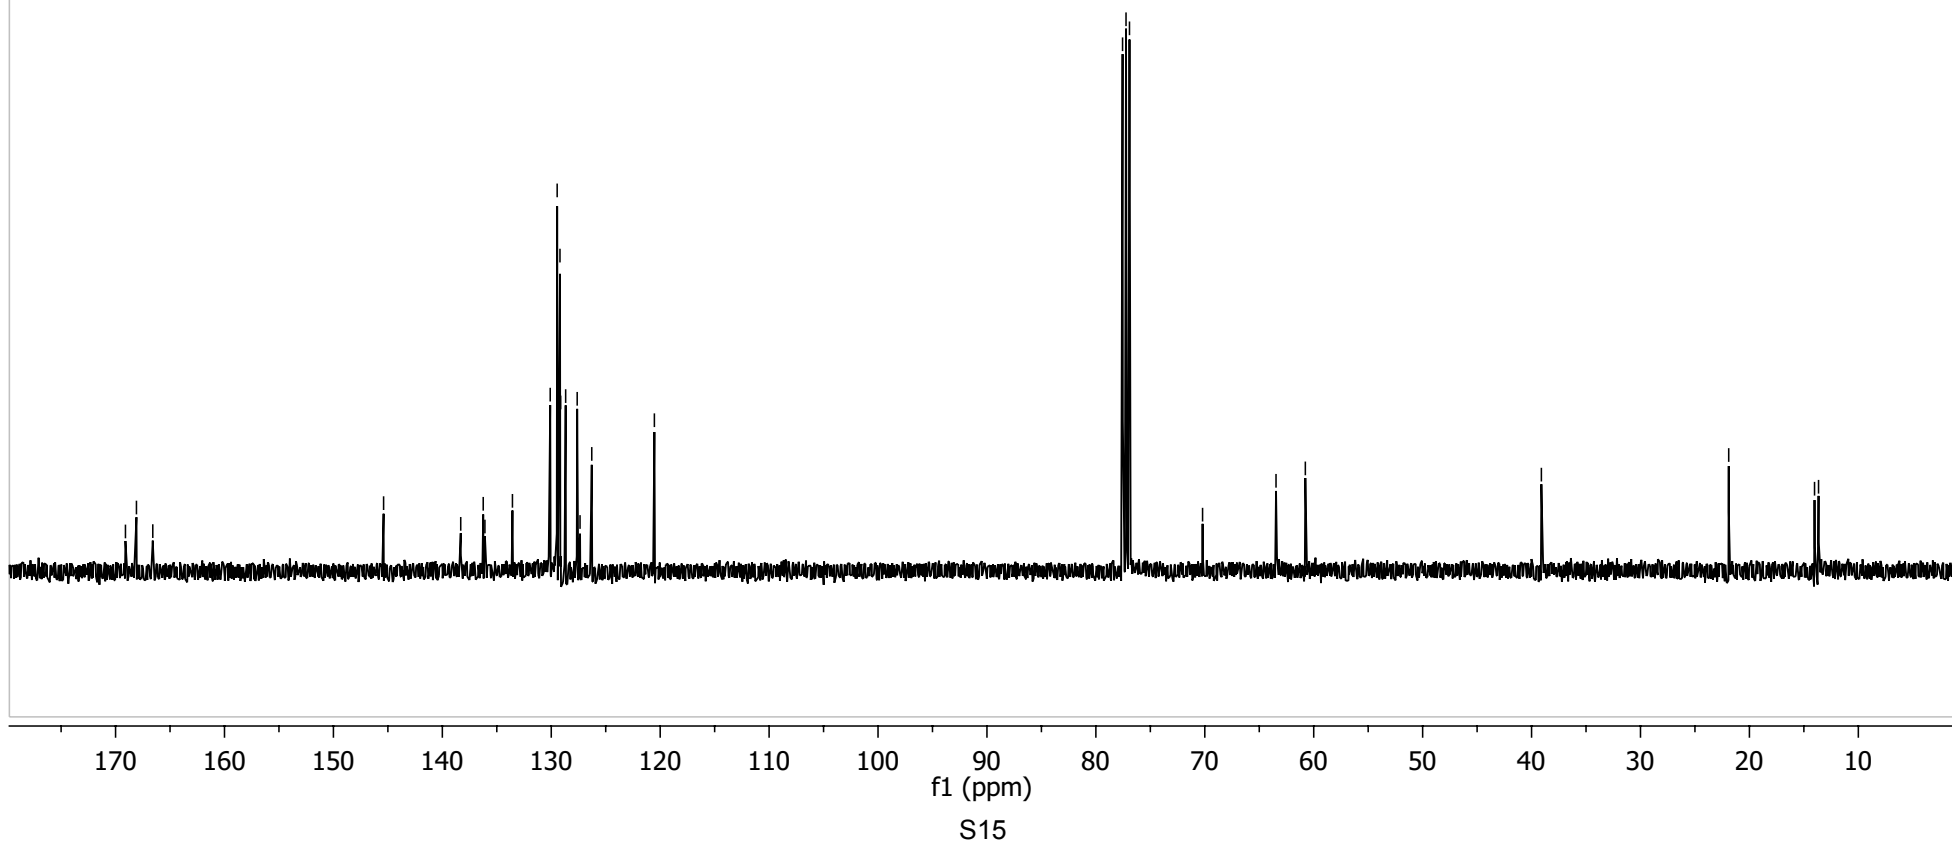

| Parameter                | Value      |
|--------------------------|------------|
| 1 Title                  | Std proton |
| 2 Origin                 | inova      |
| 3 Solvent                | cdcl3      |
| 4 Pulse Sequence         | s2pul      |
| 5 Temperature            | 30.0       |
| 6 Number of Scans        | 8          |
| 7 Spectrometer Frequency | 399.78     |
| 8 Spectral Width         | 6396.4     |
| 9 Lowest Frequency       | -799.5     |
| 10 Nucleus               | 1H         |
| 11 Acquired Size         | 13104      |
| 12 Spectral Size         | 32768      |

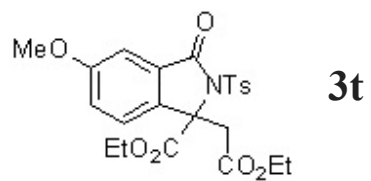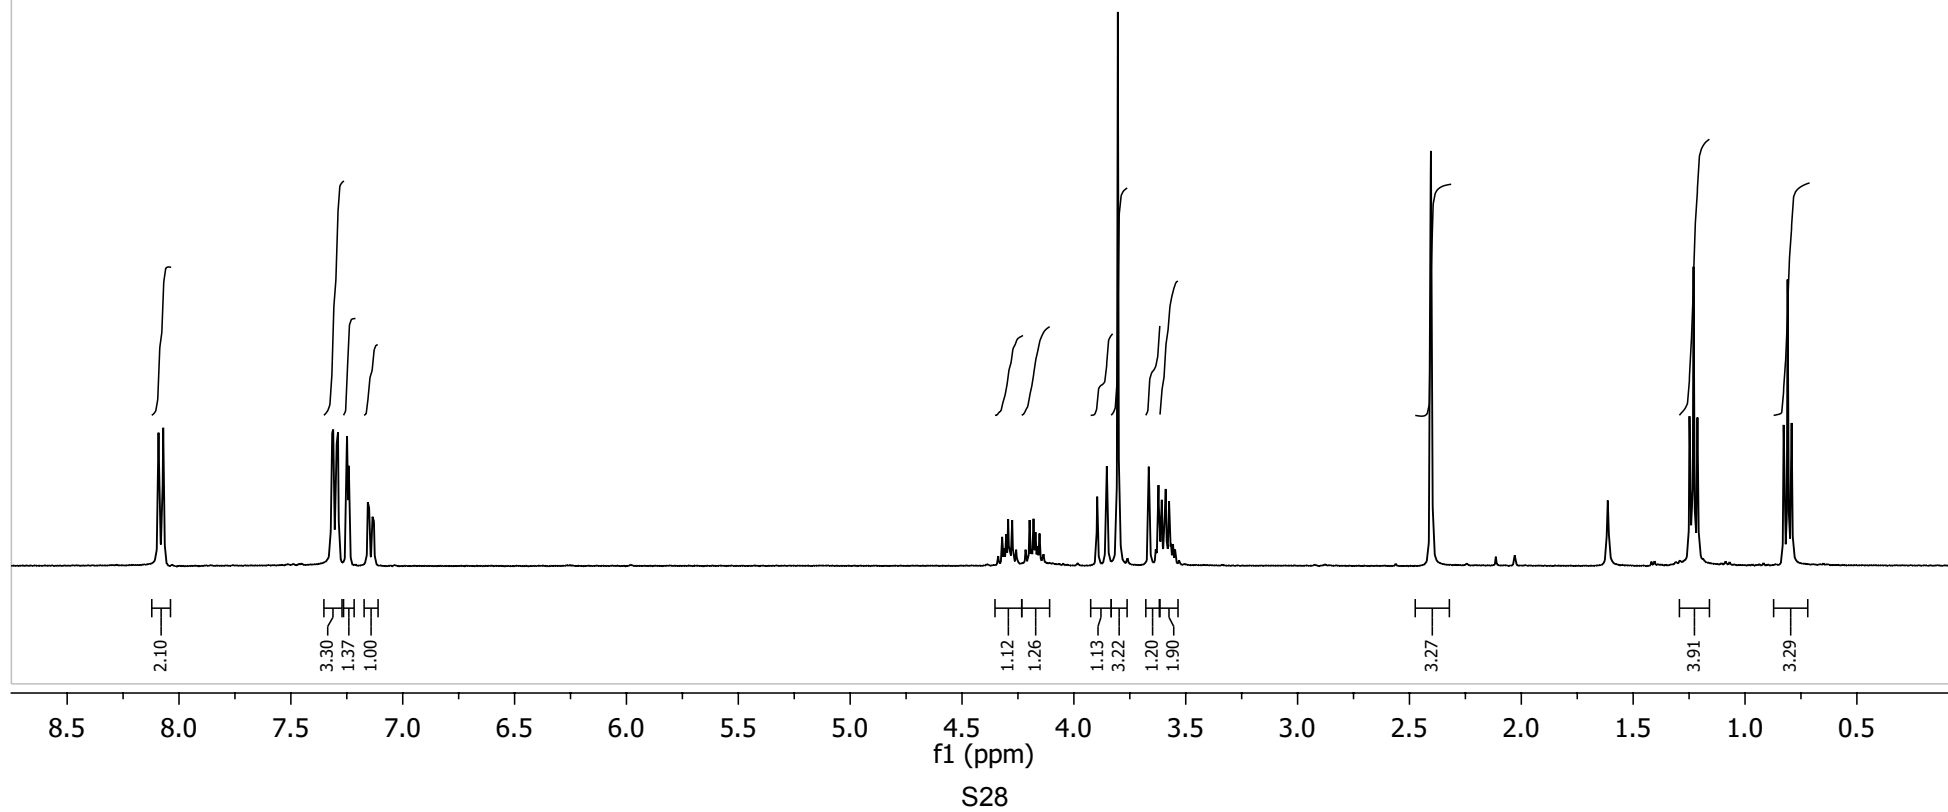

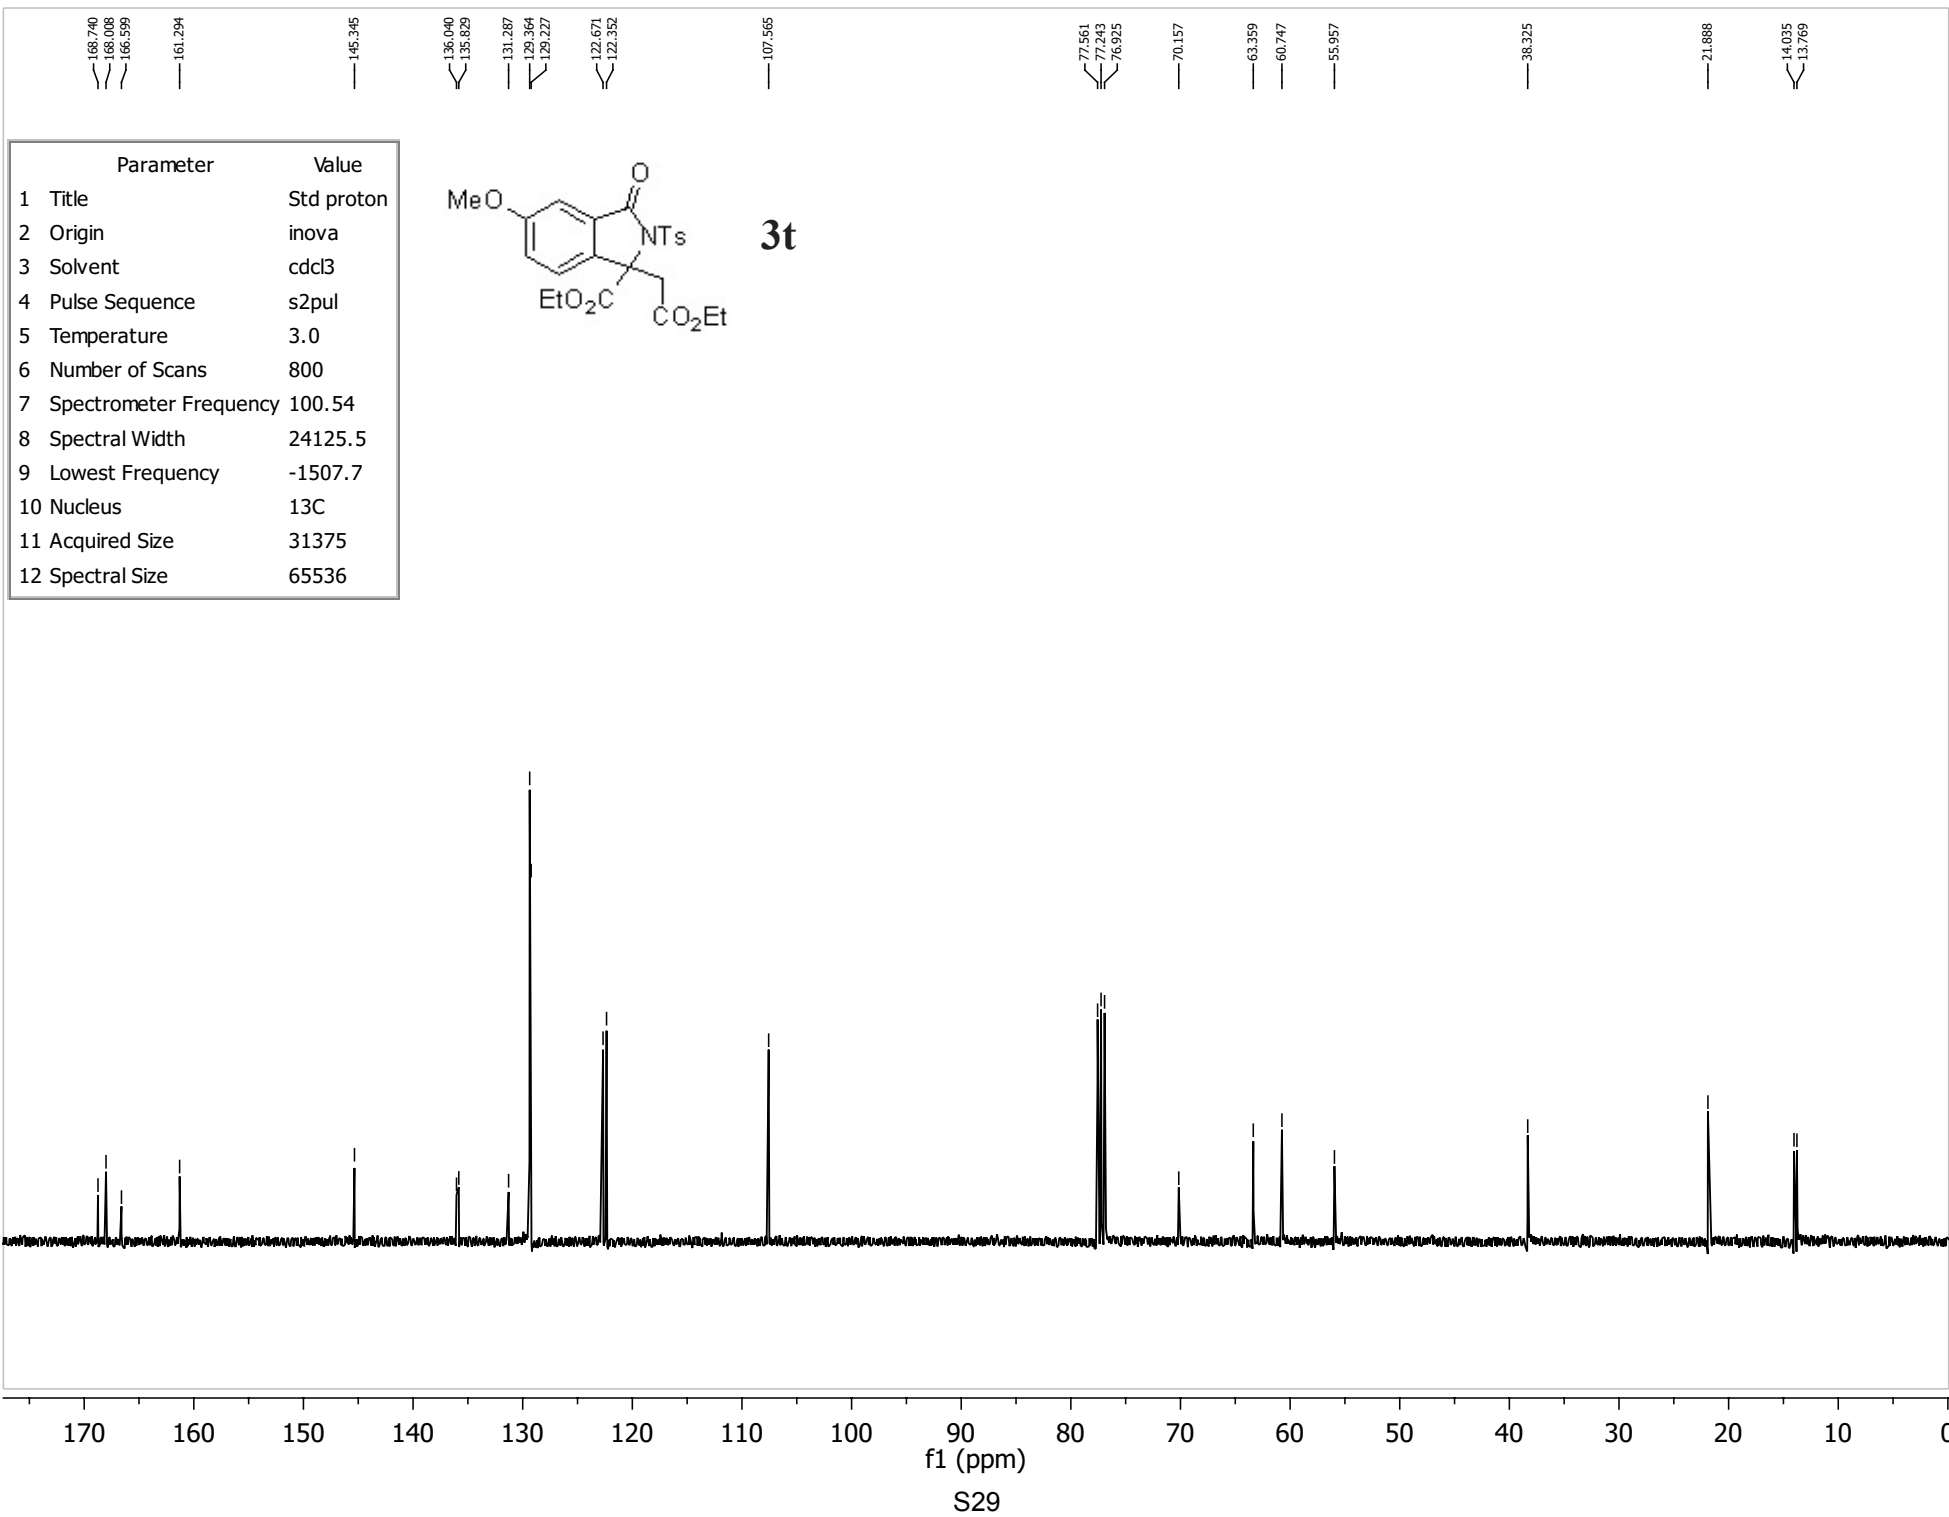

| Parameter                | Value      |
|--------------------------|------------|
| 1 Title                  | Std proton |
| 2 Origin                 | inova      |
| 3 Solvent                | cdcl3      |
| 4 Pulse Sequence         | s2pul      |
| 5 Temperature            | 30.0       |
| 6 Number of Scans        | 8          |
| 7 Spectrometer Frequency | 399.78     |
| 8 Spectral Width         | 6396.4     |
| 9 Lowest Frequency       | -793.5     |
| 10 Nucleus               | 1H         |
| 11 Acquired Size         | 13104      |
| 12 Spectral Size         | 32768      |

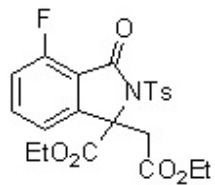

**3u**

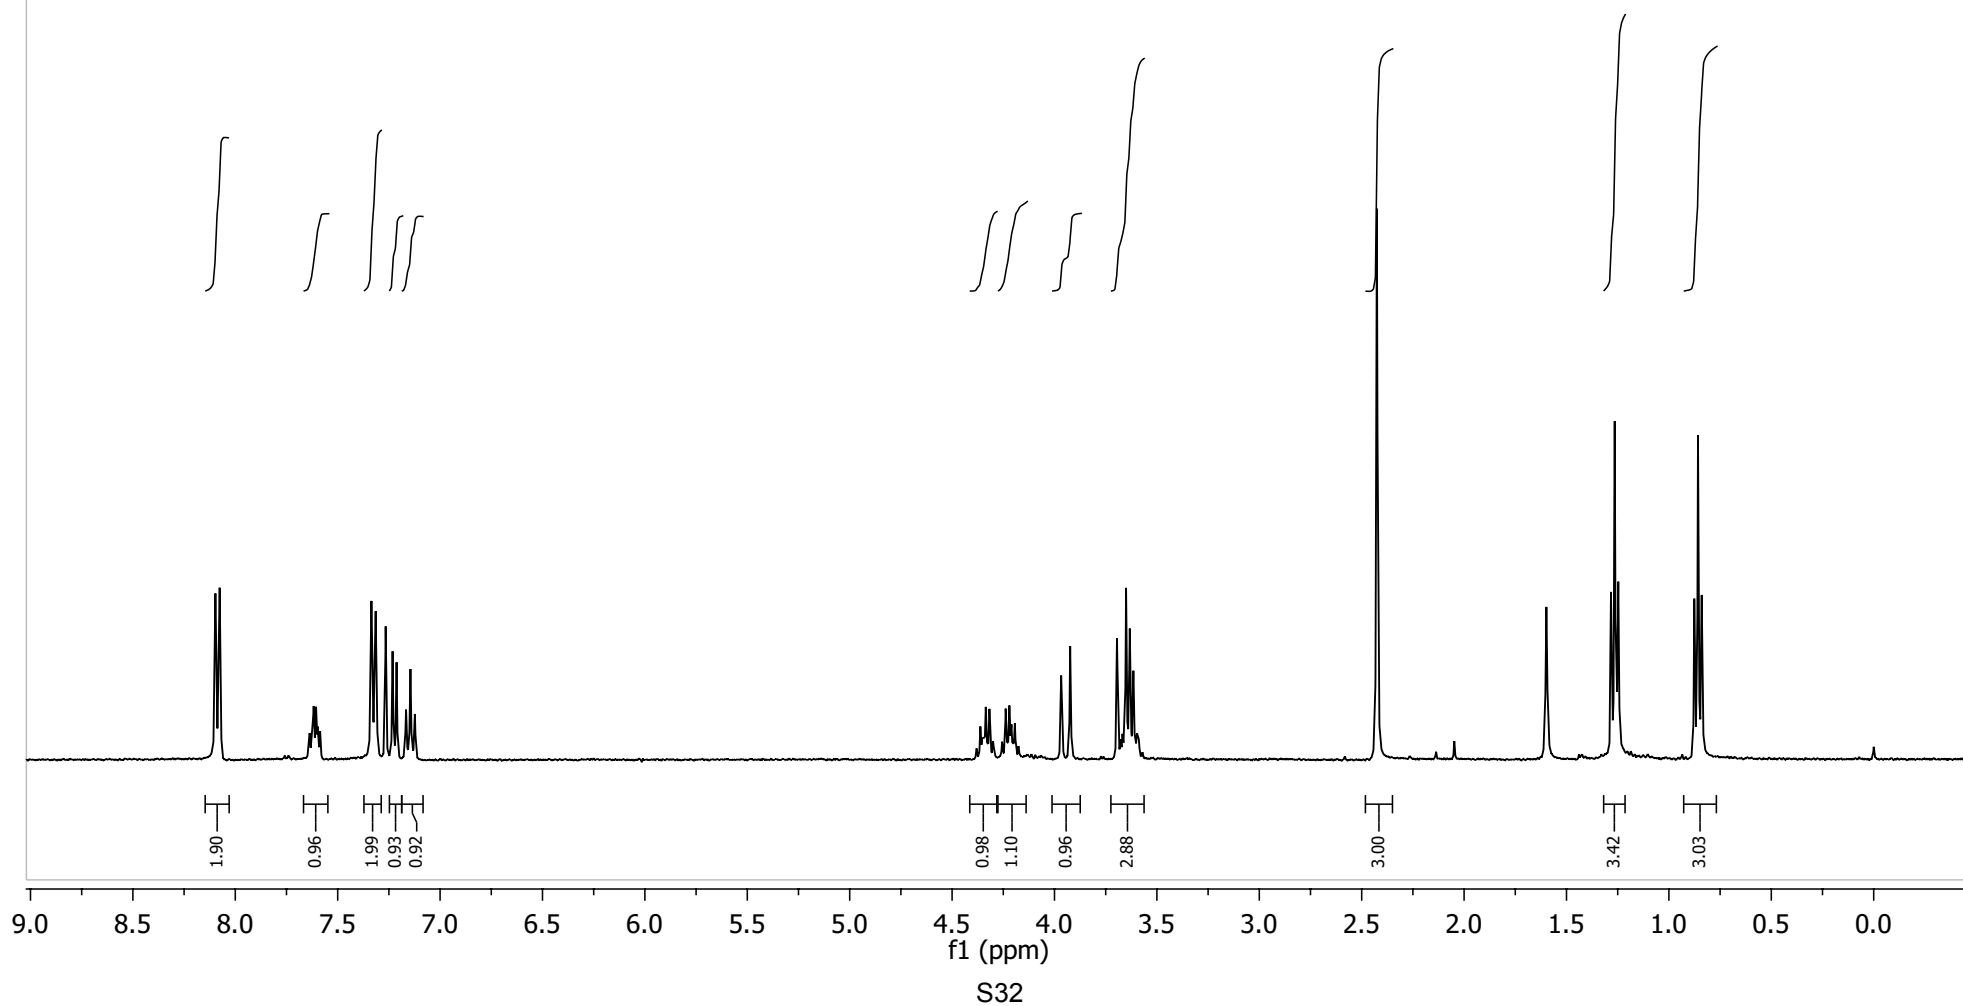

168.192  
167.782

163.311  
163.285

160.728

158.090

145.930  
145.907  
145.579

136.476  
136.397  
135.705

129.456  
129.301

117.524  
117.336  
117.210  
117.168

77.564  
77.246  
76.928

70.070

63.688  
60.937

38.632

21.905

14.016  
13.743

| Parameter                | Value      |
|--------------------------|------------|
| 1 Title                  | Std proton |
| 2 Origin                 | inova      |
| 3 Solvent                | cdcl3      |
| 4 Pulse Sequence         | s2pul      |
| 5 Temperature            | 3.0        |
| 6 Number of Scans        | 960        |
| 7 Spectrometer Frequency | 100.54     |
| 8 Spectral Width         | 24125.5    |
| 9 Lowest Frequency       | -1507.7    |
| 10 Nucleus               | 13C        |
| 11 Acquired Size         | 31375      |
| 12 Spectral Size         | 65536      |

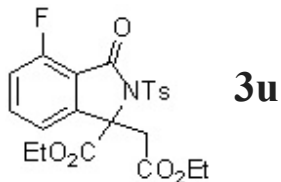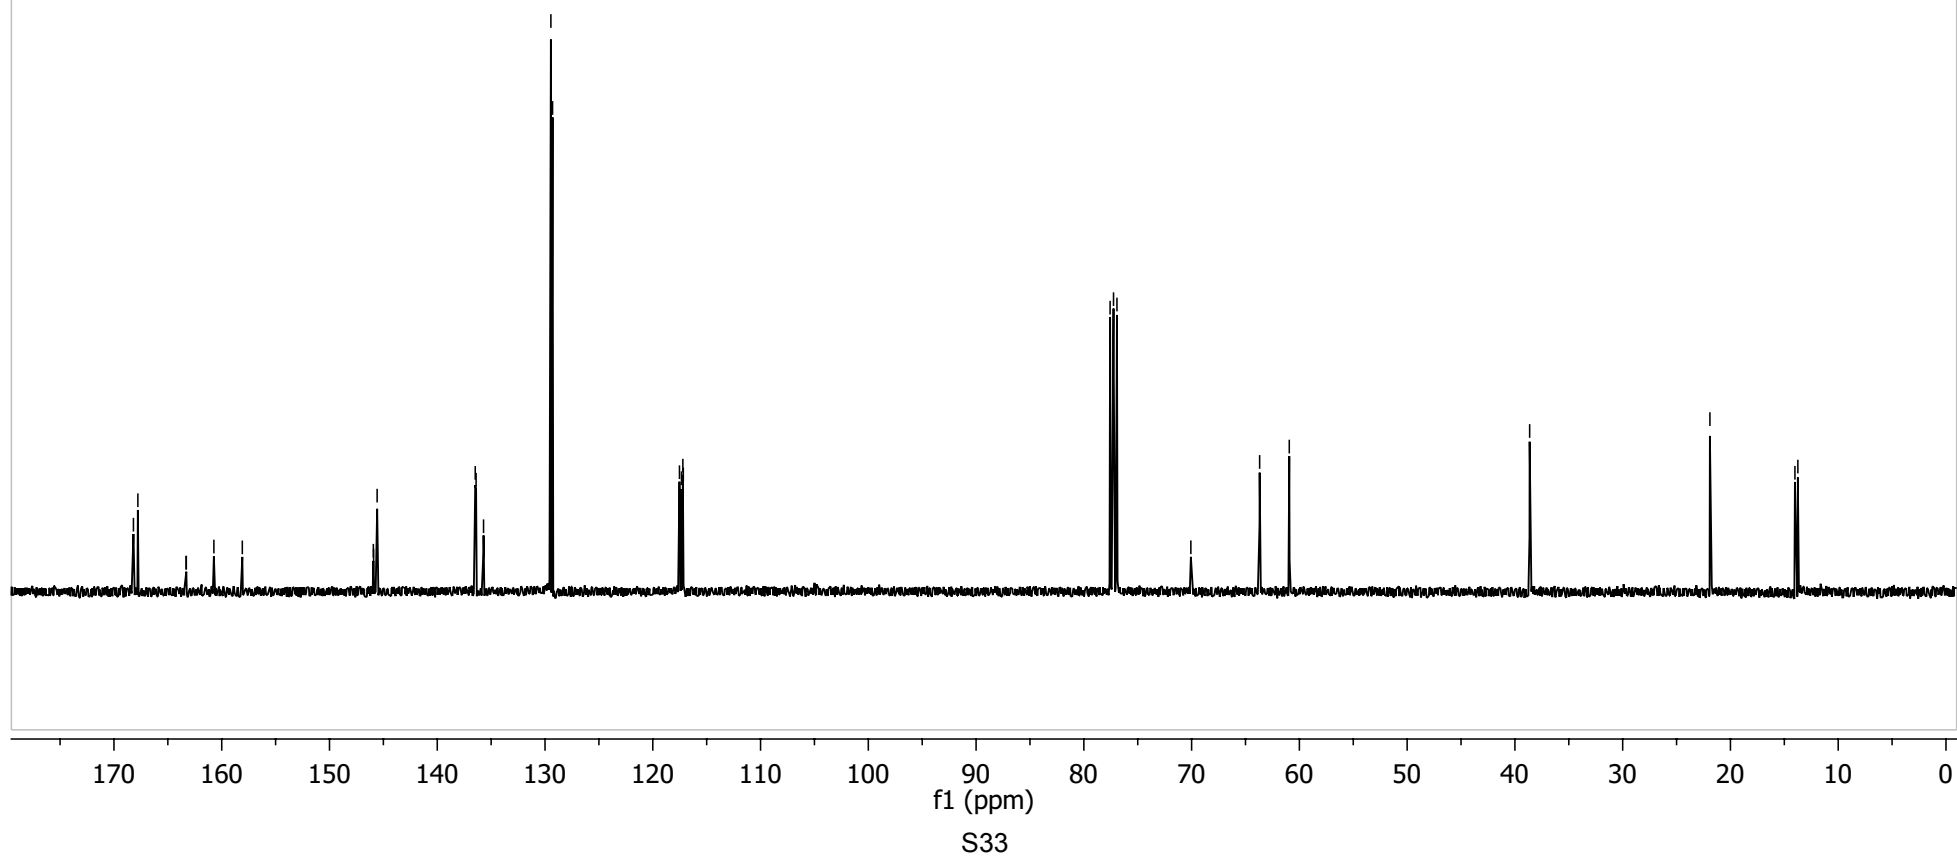



| Parameter                | Value      |
|--------------------------|------------|
| 1 Title                  | Std proton |
| 2 Origin                 | inova      |
| 3 Solvent                | cdcl3      |
| 4 Pulse Sequence         | s2pul      |
| 5 Temperature            | 50.0       |
| 6 Number of Scans        | 8          |
| 7 Spectrometer Frequency | 399.78     |
| 8 Spectral Width         | 6396.4     |
| 9 Lowest Frequency       | -799.5     |
| 10 Nucleus               | 1H         |
| 11 Acquired Size         | 13104      |
| 12 Spectral Size         | 32768      |

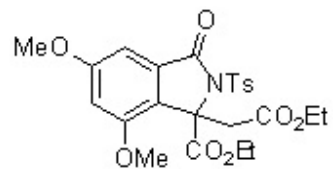

**3v**

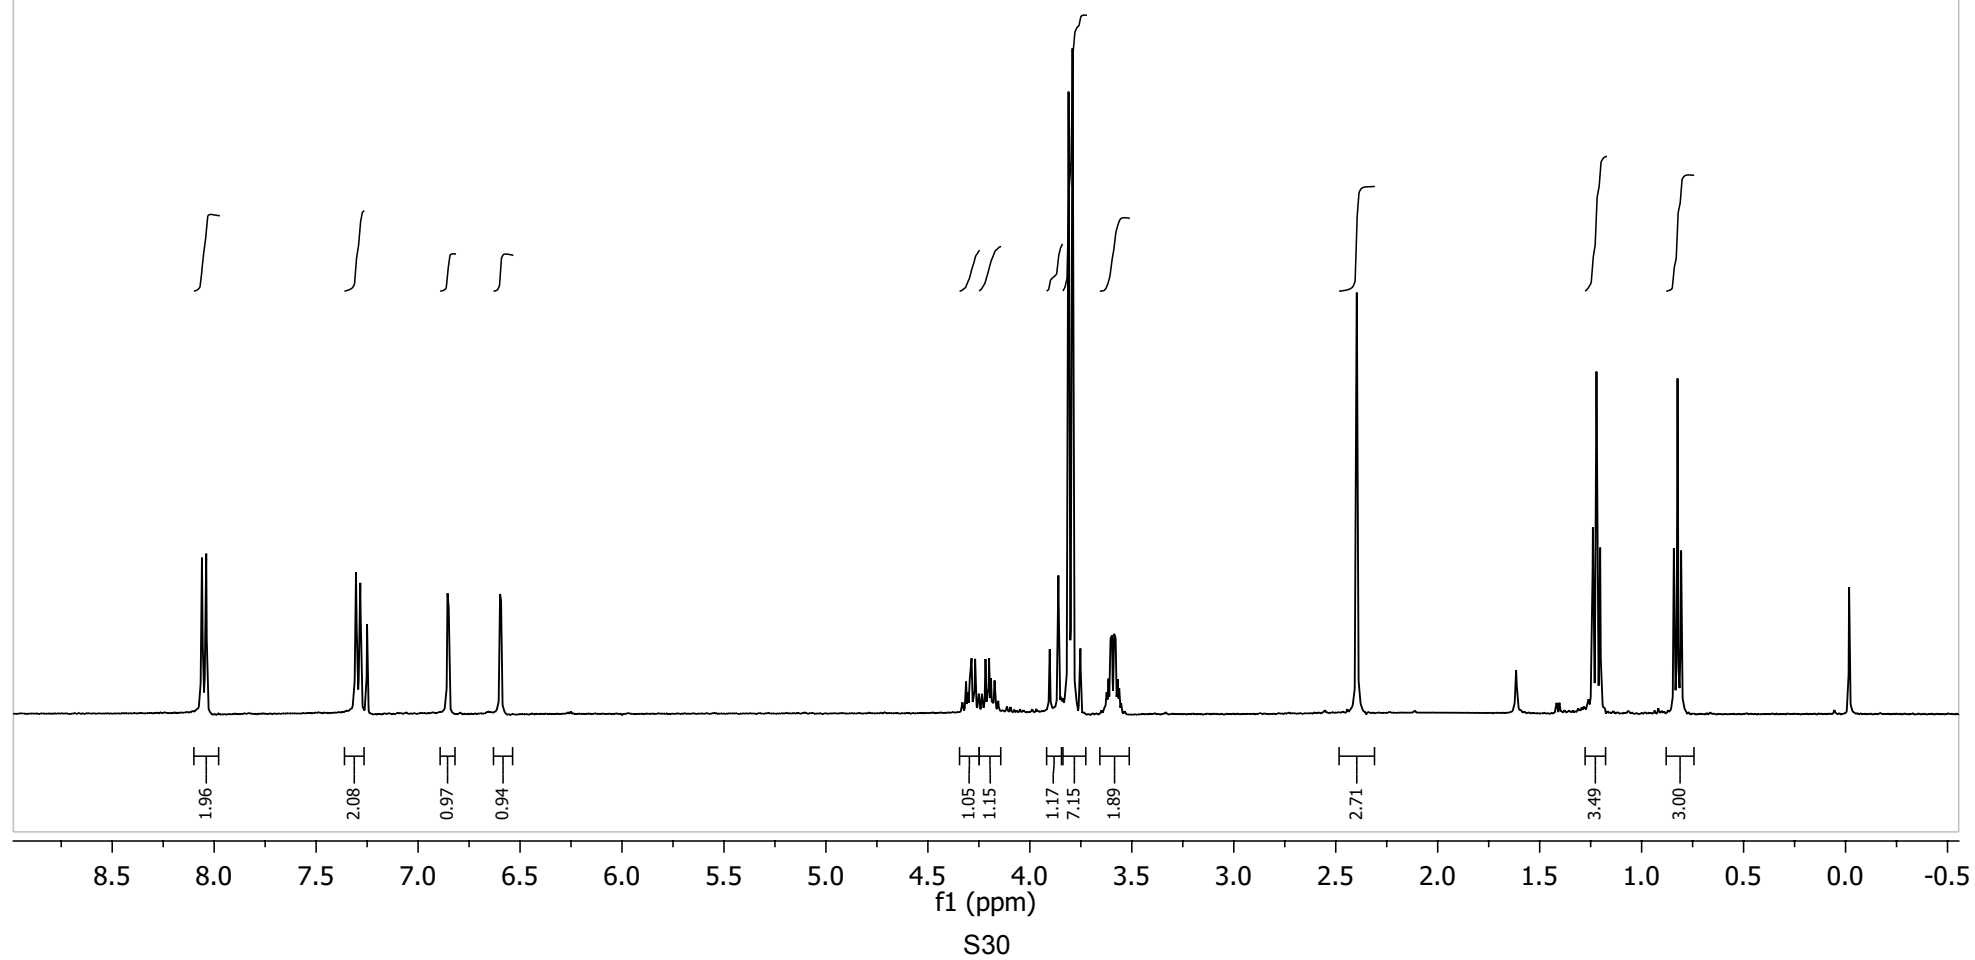

168.616  
167.752  
166.776  
162.852  
155.091  
145.264  
136.086  
132.509  
129.378  
129.097  
124.336  
105.091  
98.742  
77.563  
77.245  
76.927  
69.304  
62.928  
60.537  
56.075  
36.023  
21.874  
14.055  
13.819

| Parameter                | Value      |
|--------------------------|------------|
| 1 Title                  | Std proton |
| 2 Origin                 | inova      |
| 3 Solvent                | cdcl3      |
| 4 Pulse Sequence         | s2pul      |
| 5 Temperature            | 50.0       |
| 6 Number of Scans        | 1024       |
| 7 Spectrometer Frequency | 100.54     |
| 8 Spectral Width         | 24125.5    |
| 9 Lowest Frequency       | -1507.7    |
| 10 Nucleus               | 13C        |
| 11 Acquired Size         | 31375      |
| 12 Spectral Size         | 65536      |

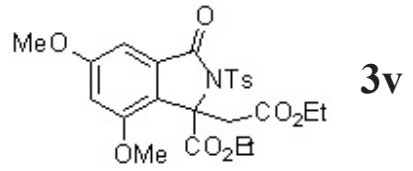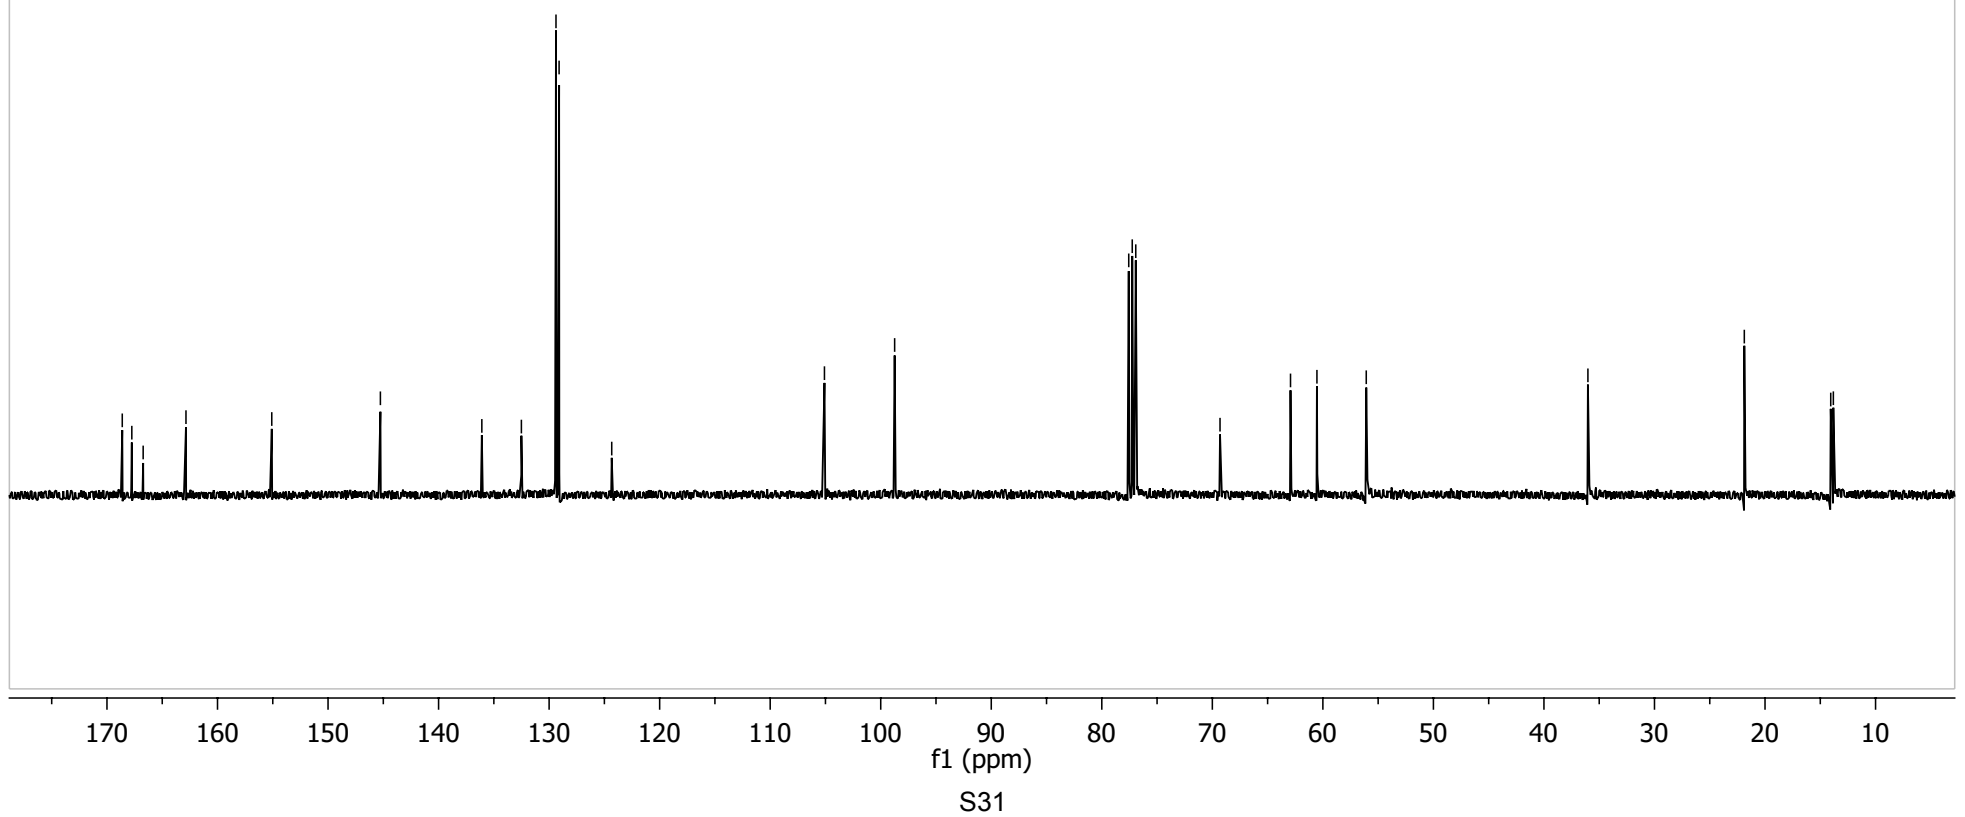

Supplement: NIHMS405393-supplement-01.pdf [file NIHMS405393-supplement-01.pdf]
